# Supplementary material for: Evaluation of the incidence and risk of hypoglycemic coma associated with selection of basal insulin in the treatment of diabetes: a Finnish register linkage study
Source: PubMed Central journal article supplement — Pharmacoepidemiol Drug Saf. 2013 Oct 21;22(12):1326–35. doi: 10.1002/pds.3534 (PMC4265848; doi:10.1002/pds.3534), 2013-10-21
Supplement: pds0022-1326-sd5.pdf [file pds0022-1326-sd5.pdf]

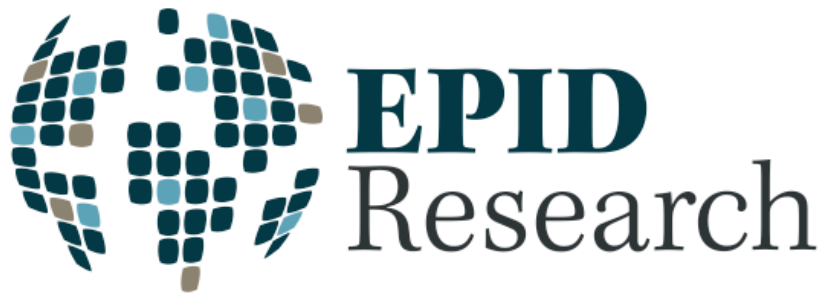

**APPENDIX 12.5**  
**Results for the NAIVE T2 population**

**Assessment of association between severe hypoglycemia and  
use of Detemir Glargine and NPH insulins**

Study #9417  
March 12th, 2013

Prepared for  
**Novo Nordisk Farma Oy**

By EPID Research Oy

# 1 List of tables

## List of Tables

|      |                                                                                                                                                                                                                                     |    |
|------|-------------------------------------------------------------------------------------------------------------------------------------------------------------------------------------------------------------------------------------|----|
| 1    | List of abbreviations . . . . .                                                                                                                                                                                                     | 7  |
| A.2  | Number of individuals stratified by first insulin at start of follow-up and by study cohort. . .                                                                                                                                    | 8  |
| A.3  | Number of individuals stratified by gender and by study cohort. . . . .                                                                                                                                                             | 9  |
| A.4  | Number of individuals stratified by gender and by first insulin in the naive cohort. . . . .                                                                                                                                        | 9  |
| A.5  | Number of individuals stratified by age at start of follow-up (10-year age groups) and by study cohort. . . . .                                                                                                                     | 10 |
| A.6  | Number of individuals stratified by age at start of follow-up (10-year age groups) and by first insulin in the naive cohort. . . . .                                                                                                | 10 |
| A.7  | Number of individuals stratified by calendar year at start of follow-up and by study cohort. .                                                                                                                                      | 11 |
| A.8  | Number of individuals stratified by calendar year at start of follow-up and by first insulin in the naive cohort. . . . .                                                                                                           | 11 |
| A.9  | Number of individuals stratified by calendar year of reimbursement decision (5-year age groups) and by study cohort. . . . .                                                                                                        | 12 |
| A.10 | Number of individuals stratified by calendar year of reimbursement decision (5-year age groups) and by first insulin in the naive cohort. . . . .                                                                                   | 12 |
| A.11 | Number of individuals stratified by hospital district at start of follow-up and by study cohort.                                                                                                                                    | 13 |
| A.12 | Number of individuals stratified by hospital district at start of follow-up and by first insulin in the naive cohort. . . . .                                                                                                       | 14 |
| B.13 | The number/risk time/incidence rate (95% CI) of first hypoglycemic coma event for detemir insulin, glargine insulin, and NPH-insulin stratified by gender. . . . .                                                                  | 15 |
| B.14 | The number/risk time/incidence rate (95% CI) of first hypoglycemic coma event for detemir insulin, glargine insulin, and NPH-insulin stratified by age at start of follow up. . . . .                                               | 16 |
| B.15 | The number/risk time/incidence rate (95% CI) of first hypoglycemic coma event for detemir insulin, glargine insulin, and NPH-insulin stratified by calendar year at start of follow-up. . .                                         | 17 |
| B.16 | The number/risk time/incidence rate (95% CI) of first hypoglycemic coma event for detemir insulin, glargine insulin, and NPH-insulin stratified by calendar time since diagnose (first reimbursement decision or purchase). . . . . | 18 |
| B.17 | The number/risk time/incidence rate (95% CI) of first hypoglycemic coma event for detemir insulin, glargine insulin, and NPH-insulin stratified by history use of oral diabetes medication (A10BB) at start of follow-up. . . . .   | 19 |
| B.18 | The number/risk time/incidence rate (95% CI) of first hypoglycemic coma event for detemir insulin, glargine insulin, and NPH-insulin stratified by history use of insulin medication (A10A) at start of follow-up. . . . .          | 19 |
| B.19 | The number/risk time/incidence rate (95% CI) of first hypoglycemic coma event for detemir insulin, glargine insulin, and NPH-insulin stratified by hospitalization history at start of follow-up. . . . .                           | 20 |
| B.20 | The number/risk time/incidence rate (95% CI) of first hypoglycemic coma event for detemir insulin, glargine insulin, and NPH-insulin stratified by hospital district at start of follow-up. .                                       | 21 |
| C.21 | The number/risk time/incidence rate (95% CI) for recurrence of hypoglycemic coma events for detemir insulin, glargine insulin, and NPH-insulin stratified by gender. . . . .                                                        | 22 |
| C.22 | The number/risk time/incidence rate (95% CI) for recurrence of hypoglycemic coma events for detemir insulin, glargine insulin, and NPH-insulin stratified by age at start of follow up. .                                           | 23 |
| C.23 | The number/risk time/incidence rate (95% CI) for recurrence of hypoglycemic coma events for detemir insulin, glargine insulin, and NPH-insulin stratified by calendar year at start of follow-up. . . . .                           | 24 |

|      |                                                                                                                                                                                                                                                                                                                                                                                                                                                                                                                                            |    |
|------|--------------------------------------------------------------------------------------------------------------------------------------------------------------------------------------------------------------------------------------------------------------------------------------------------------------------------------------------------------------------------------------------------------------------------------------------------------------------------------------------------------------------------------------------|----|
| C.24 | The number/risk time/incidence rate (95% CI) for recurrence of hypoglycemic coma events for detemir insulin, glargine insulin, and NPH-insulin stratified by calendar time since diagnose (first reimbursement decision or purchase). . . . .                                                                                                                                                                                                                                                                                              | 25 |
| C.25 | The number/risk time/incidence rate (95% CI) for recurrence of hypoglycemic coma events for detemir insulin, glargine insulin, and NPH-insulin stratified by history use of oral diabetes medication (A10BB) at start of follow-up. . . . .                                                                                                                                                                                                                                                                                                | 26 |
| C.26 | The number/risk time/incidence rate (95% CI) for recurrence of hypoglycemic coma events for detemir insulin, glargine insulin, and NPH-insulin stratified by hospitalization history at start of follow-up. . . . .                                                                                                                                                                                                                                                                                                                        | 26 |
| C.27 | The number/risk time/incidence rate (95% CI) for recurrence of hypoglycemic coma events for detemir insulin, glargine insulin, and NPH-insulin stratified by history use of insulin medication (A10A) at start of follow-up. . . . .                                                                                                                                                                                                                                                                                                       | 27 |
| C.28 | The number/risk time/incidence rate (95% CI) for recurrence of hypoglycemic coma events for detemir insulin, glargine insulin, and NPH-insulin stratified by hospital district at start of follow-up. . . . .                                                                                                                                                                                                                                                                                                                              | 28 |
| D.29 | The number/risk time/incidence rate (95% CI) of all hypoglycemic coma events for detemir insulin, glargine insulin, and NPH-insulin stratified by gender. . . . .                                                                                                                                                                                                                                                                                                                                                                          | 29 |
| D.30 | The number/risk time/incidence rate (95% CI) of all hypoglycemic coma events for detemir insulin, glargine insulin, and NPH-insulin stratified by age at start of follow up. . . . .                                                                                                                                                                                                                                                                                                                                                       | 30 |
| D.31 | The number/risk time/incidence rate (95% CI) of all hypoglycemic coma events for detemir insulin, glargine insulin, and NPH-insulin stratified by calendar year at start of follow-up. . . . .                                                                                                                                                                                                                                                                                                                                             | 31 |
| D.32 | The number/risk time/incidence rate (95% CI) of all hypoglycemic coma events for detemir insulin, glargine insulin, and NPH-insulin stratified by calendar time since diagnose (first reimbursement decision or purchase). . . . .                                                                                                                                                                                                                                                                                                         | 32 |
| D.33 | The number/risk time/incidence rate (95% CI) of all hypoglycemic coma events for detemir insulin, glargine insulin, and NPH-insulin stratified by history use of oral diabetes medication (A10BB) at start of follow-up. . . . .                                                                                                                                                                                                                                                                                                           | 33 |
| D.34 | The number/risk time/incidence rate (95% CI) of all hypoglycemic coma events for detemir insulin, glargine insulin, and NPH-insulin stratified by hospitalization history at start of follow-up. . . . .                                                                                                                                                                                                                                                                                                                                   | 33 |
| D.35 | The number/risk time/incidence rate (95% CI) of all hypoglycemic coma events for detemir insulin, glargine insulin, and NPH-insulin stratified by history use of insulin medication (A10A) at start of follow-up. . . . .                                                                                                                                                                                                                                                                                                                  | 34 |
| D.36 | The number/risk time/incidence rate (95% CI) of all hypoglycemic coma events for detemir insulin, glargine insulin, and NPH-insulin stratified by hospital district at start of follow-up. . . . .                                                                                                                                                                                                                                                                                                                                         | 35 |
| E.37 | The risk for the first hypoglycemic coma event estimated by the Cox's proportional hazards model. Hospital district as strata. Glargine insulin as reference . . . . .                                                                                                                                                                                                                                                                                                                                                                     | 36 |
| E.38 | The risk for the first hypoglycemic coma event estimated by the Cox's proportional hazards model. Hospital district as strata. NPH insulin as reference . . . . .                                                                                                                                                                                                                                                                                                                                                                          | 37 |
| E.39 | Sensitivity analysis for the risk of first hypoglycemic coma event estimated by the Cox's proportional hazards model. Hospital district as strata. NPH insulin as reference. I) Original estimates, II) Estimates assuming no gaps in use of detemir, glargine, and NPH-insulins, III) Estimates considering hypoglycemic events with main diagnose E10.00 or E11.00 only,IV) Periods with overlapping use of detemir, glargine, or NPH-insulins are removed, V) follow-up ends at first switch. . . . .                                   | 38 |
| E.40 | Sensitivity analysis for the risk of first hypoglycemic coma event estimated by the Cox's proportional hazards model. Hospital district as strata. NPH insulin as reference. I) Original estimates, II-IV) Inverse propensity score weighting (IPW). Individuals weighted by the inverse of the probability to start on their insulin conditional on covariates (gender, typedm, age-group2, calyear2, BB.stfup, A10A.stfup, hosph.stfup, time2diag), truncation points given in paranthesis, III) IPW-weights with no truncation. . . . . | 39 |

|                                                                                                                                                                                                                                                                                                                                                                                                                                                                                                                                                         |    |
|---------------------------------------------------------------------------------------------------------------------------------------------------------------------------------------------------------------------------------------------------------------------------------------------------------------------------------------------------------------------------------------------------------------------------------------------------------------------------------------------------------------------------------------------------------|----|
| E.41 sensitivity analysis for the risk for the first hypoglycemic coma event estimated by the Cox's proportional hazards model. The probability conditional on covariates (gender, typedm, agegroup2, calyear2, BB.stfup, A10A.stfup, hosph.stfup, time2diag) to initiate treatment with detemir and glargine as two additional covariates. Hospital district as strata. NPH insulin as reference . . . . .                                                                                                                                             | 40 |
| E.42 The risk for the first hypoglycemic coma event estimated by the Cox's proportional hazards model. Hospital district as strata. Glargine insulin as reference. Data before 2006 censored .                                                                                                                                                                                                                                                                                                                                                          | 41 |
| E.43 The risk for the first hypoglycemic coma event estimated by the Cox's proportional hazards model. Hospital district as strata. NPH insulin as reference. Data before 2006 censored . . . .                                                                                                                                                                                                                                                                                                                                                         | 42 |
| E.44 The risk for recurrence of hypoglycemic coma events estimated by the Cox's proportional hazards model. Hospital district as strata. Glargine insulin as reference . . . . .                                                                                                                                                                                                                                                                                                                                                                        | 43 |
| E.45 The risk for recurrence of hypoglycemic coma events estimated by the Cox's proportional hazards model. Hospital district as strata. NPH insulin as reference . . . . .                                                                                                                                                                                                                                                                                                                                                                             | 44 |
| E.46 Sensitivity analysis of the risk for recurrence of hypoglycemic coma events estimated by the Cox's proportional hazards model. Hospital district as strata. NPH insulin as reference. I) Original estimates, II) Estimates assuming no gaps in use of detemir, glargine, and NPH-insulins, III) Estimates considering hypoglycemic events with main diagnose E10.00 or E11.00 only, IV) Periods with overlapping use of detemir, glargine, or NPH-insulins are removed, V) follow-up ends at first switch. . . . .                                 | 45 |
| E.47 Sensitivity analysis of the risk for recurrence of hypoglycemic coma events estimated by the Cox's proportional hazards model. Hospital district as strata. NPH insulin as reference. I) Original estimates, II-IV) Inverse propensity score weighting (IPW). Individuals weighted by the inverse of the probability to start on their insulin conditional on covariates (gender, typedm, agegroup2, calyear2, BB.stfup, A10A.stfup, hosph.stfup, time2diag), truncation points given in paranthesis, III) IPW-weights with no truncation. . . . . | 46 |
| E.48 sensitivity analysis of the risk for recurrence of hypoglycemic coma events estimated by the Cox's proportional hazards model. The probability, conditional on covariates (gender, typedm, agegroup2, calyear2, BB.stfup, A10A.stfup, hosph.stfup, time2diag) to initiate treatment with detemir and glargine as two additional covariates. Hospital district as strata. NPH insulin as reference . . . . .                                                                                                                                        | 47 |
| E.49 The risk for recurrence of severe hypoglycemic events estimated by the Cox's proportional hazards model. Hospital district as strata. Glargine insulin as reference. Data before 2006 censored . . . . .                                                                                                                                                                                                                                                                                                                                           | 48 |
| E.50 The risk for recurrence of severe hypoglycemic events estimated by the Cox's proportional hazards model. Hospital district as strata. NPH insulin as reference. Data before 2006 censored                                                                                                                                                                                                                                                                                                                                                          | 49 |
| E.51 The risk for all hypoglycemic coma events estimated by the Cox's proportional hazards model. Hospital district as strata. Glargine insulin as reference . . . . .                                                                                                                                                                                                                                                                                                                                                                                  | 50 |
| E.52 The risk for all hypoglycemic coma events estimated by the Cox's proportional hazards model. Hospital district as strata. NPH insulin as reference . . . . .                                                                                                                                                                                                                                                                                                                                                                                       | 51 |
| F.53 Hospitalizations and secondary care visits due to severe hypoglycemic coma events stratified by insulin at start of follow-up and by present insulin. The number of visits and the distribution of the length of the visits. . . . .                                                                                                                                                                                                                                                                                                               | 52 |
| F.54 Hospitalizations and secondary care visits due to severe hypoglycemic coma events stratified by insulin at start of follow-up and by present insulin. The number of visits and the distribution of visit length (Days) described by the minimum, the 25% quantile, the median, the mean, the 75% quantile and the maximum. . . . .                                                                                                                                                                                                                 | 53 |
| F.55 Hospitalizations and secondary care visits due to severe hypoglycemic coma events stratified by reimbursement diagnose and by insulin. The number of visits and the distribution of the length of the visits. . . . .                                                                                                                                                                                                                                                                                                                              | 54 |

|                                                                                                                                                                                                                                                                                                                                                                                        |    |
|----------------------------------------------------------------------------------------------------------------------------------------------------------------------------------------------------------------------------------------------------------------------------------------------------------------------------------------------------------------------------------------|----|
| F.56 Hospitalizations and secondary care visits due to severe hypoglycemic coma events stratified by reimbursement diagnose and by insulin. The number of visits and the distribution of visit length (Days) described by the minimum, the 25% quantile, the median, the mean, the 75% quantile and the maximum. . . . .                                                               | 55 |
| F.57 Hospitalizations and secondary care visits due to severe hypoglycemic coma events stratified by gender and by insulin. The number of visits and the distribution of the length of the visits.                                                                                                                                                                                     | 56 |
| F.58 Hospitalizations and secondary care visits due to severe hypoglycemic coma events stratified by gender and by insulin. The number of visits and the distribution of visit length (Days) described by the minimum, the 25% quantile, the median, the mean, the 75% quantile and the maximum. . . . .                                                                               | 57 |
| F.59 Hospitalizations and secondary care visits due to severe hypoglycemic coma events stratified by age at start of follow-up and by insulin. The number of visits and the distribution of the length of the visits. . . . .                                                                                                                                                          | 58 |
| F.60 Hospitalizations and secondary care visits due to severe hypoglycemic coma events stratified by age at start of follow-up and by insulin. The number of visits and the distribution of visit length (Days) described by the minimum, the 25% quantile, the median, the mean, the 75% quantile and the maximum. . . . .                                                            | 59 |
| F.61 Hospitalizations and secondary care visits due to severe hypoglycemic coma events stratified by calendar year at start of follow-up and by insulin. The number of visits and the distribution of the length of the visits. . . . .                                                                                                                                                | 60 |
| F.62 Hospitalizations and secondary care visits due to severe hypoglycemic coma events stratified by calendar year at start of follow-up and by insulin. The number of visits and the distribution of visit length (Days) described by the minimum, the 25% quantile, the median, the mean, the 75% quantile and the maximum. . . . .                                                  | 61 |
| F.63 Hospitalizations and secondary care visits due to severe hypoglycemic coma events stratified by time (Years) from year of diagnose (first reimbursement decision or purchase) at start of follow-up. The number of visits and the distribution of the length of the visits. . . . .                                                                                               | 62 |
| F.64 Hospitalizations and secondary care visits due to severe hypoglycemic coma events stratified by time (Years) from year of diagnose (first reimbursement decision or purchase) at start of follow-up. The number of visits and the distribution of visit length (Days) described by the minimum, the 25% quantile, the median, the mean, the 75% quantile and the maximum. . . . . | 63 |
| F.65 Hospitalizations and secondary care visits due to severe hypoglycemic coma events stratified by hospital district at start of follow-up and by insulin. . . . .                                                                                                                                                                                                                   | 64 |
| F.66 Hospitalizations and secondary care visits due to severe hypoglycemic coma events stratified by hospital district at start of follow-up and by insulin. . . . .                                                                                                                                                                                                                   | 65 |
| G.67 The number/risk time/incidence rate (95% CI) for all-cause mortality for detemir insulin, glargine insulin, and NPH-insulin stratified by gender. . . . .                                                                                                                                                                                                                         | 66 |
| G.68 The number/risk time/incidence rate (95% CI) for all-cause mortality for detemir insulin, glargine insulin, and NPH-insulin stratified by age at start of follow up. . . . .                                                                                                                                                                                                      | 67 |
| G.69 The number/risk time/incidence rate (95% CI) for all-cause mortality for detemir insulin, glargine insulin, and NPH-insulin stratified by calendar year at start of follow-up. . . . .                                                                                                                                                                                            | 68 |
| G.70 The number/risk time/incidence rate (95% CI) for all-cause mortality for detemir insulin, glargine insulin, and NPH-insulin stratified by calendar time since diagnose (first reimbursement decision or purchase). . . . .                                                                                                                                                        | 69 |
| G.71 The number/risk time/incidence rate (95% CI) for all-cause mortality for detemir insulin, glargine insulin, and NPH-insulin stratified by history use of oral diabetes medication (A10BB) at start of follow-up. . . . .                                                                                                                                                          | 70 |
| G.72 The number/risk time/incidence rate (95% CI) for all-cause mortality for detemir insulin, glargine insulin, and NPH-insulin stratified by history use of insulin medication (A10A) at start of follow-up. . . . .                                                                                                                                                                 | 70 |

|                                                                                                                                                                                                                                                                                                                                                                                                                                                                                                                           |    |
|---------------------------------------------------------------------------------------------------------------------------------------------------------------------------------------------------------------------------------------------------------------------------------------------------------------------------------------------------------------------------------------------------------------------------------------------------------------------------------------------------------------------------|----|
| G.73 The number/risk time/incidence rate (95% CI) for all-cause mortality for detemir insulin, glargine insulin, and NPH-insulin stratified by hospitalization history at start of follow-up. . .                                                                                                                                                                                                                                                                                                                         | 71 |
| G.74 The number/risk time/incidence rate (95% CI) for all-cause mortality for detemir insulin, glargine insulin, and NPH-insulin stratified by hospital district at start of follow-up. . . . .                                                                                                                                                                                                                                                                                                                           | 72 |
| G.75 The risk for all-cause mortality estimated by the Cox’s proportional hazards model. Hospital district as strata. Glargine insulin as reference . . . . .                                                                                                                                                                                                                                                                                                                                                             | 73 |
| G.76 The risk for all-cause mortality estimated by the Cox’s proportional hazards model. Hospital district as strata. NPH insulin as reference . . . . .                                                                                                                                                                                                                                                                                                                                                                  | 74 |
| G.77 Sensitivity analysis for all-cause mortality estimated by the Cox’s proportional hazards model. Hospital district as strata. NPH insulin as reference. I) Original estimates, II-IV) Inverse propensity score weighting (IPW). Individuals weighted by the inverse of the probability to start on their insulin conditional on covariates (gender, typedm, agegroup2, calyear2, BB.stfup, A10A.stfup, hosp.h.stfup, time2diag), truncation points given in paranthesis, III) IPW-weights with no truncation. . . . . | 75 |

## 2 List of abbreviations

Table 1: List of abbreviations

| S.No. | Abbreviation        | 2. Abbrev<br>Cox's model | Expansion                                                                          |
|-------|---------------------|--------------------------|------------------------------------------------------------------------------------|
| 1     | Gender              | gender                   | Gender (Male or Female)                                                            |
| 2     | Age-group           | agegroup                 | Age-group at start of follow-up (10 years intervals)                               |
| 3     | Diagnose            | typedm                   | Diagnose as given in the reimbursement decision (T1, T2, or Undefined)             |
| 4     | First Insulin       |                          | Insulin at start of follow-up, (detemir, glargine, NPH, or none of these (no DGN)) |
| 5     | Calender year       | calyear                  | Calender year at start of follow-up (00-05, 06, 07, 08, 09)                        |
| 6     | Year of diagnose    |                          | Year of diagnose (5 year intervals)                                                |
| 7     | Time since diagnose | time2diag                | Time since diagnose at start of follow-up, (under 1, 1-2, 2-5, over 5 years)       |
| 8     | A10BB hist          | BB.stfup                 | History use of oral diabetes medication, (ICD10 code A10BB) at start of follow-up  |
| 9     | A10A hist           | A10A.stfup               | History use of insulins (ICD10 codes A10A) at start of follow-up                   |
| 10    | Hosp hist           | hosph.stfup              | History of hospitalizations due to severe hypoglycaemic coma at start of follow-up |
| 11    |                     | useBB                    | Present use of oral diabetes medication (A10BB)                                    |
| 12    |                     | useA10A                  | Present use of insulins (A10A) other than glargine , detemir and NPH-insulins      |
| 13    | Hospital district   |                          | Hospital district at start of follow-up                                            |
| 14    | DGN                 |                          | Detemir, Glargine or NPH                                                           |



## A Appendix 1: Study population description

Table A.2: Number of individuals stratified by first insulin at start of follow-up and by study cohort.

| S.No. | Insulin | Naive |       | Non-naive |       | Other |       | Total |       |
|-------|---------|-------|-------|-----------|-------|-------|-------|-------|-------|
|       |         | N     | %     | N         | %     | N     | %     | N     | %     |
| 1     | A10AA01 | 0     | 0.0   | 0         | 0.0   | 0     | 0.0   | 0     | 0.0   |
| 2     | A10AB01 | 0     | 0.0   | 0         | 0.0   | 320   | 8.3   | 320   | 0.5   |
| 3     | A10AB04 | 0     | 0.0   | 0         | 0.0   | 65    | 1.7   | 65    | 0.1   |
| 4     | A10AB05 | 0     | 0.0   | 0         | 0.0   | 273   | 7.1   | 273   | 0.5   |
| 5     | A10AB06 | 0     | 0.0   | 0         | 0.0   | 4     | 0.1   | 4     | 0.0   |
| 6     | A10AC01 | 30450 | 63.5  | 6412      | 98.3  | 0     | 0.0   | 36862 | 63.2  |
| 7     | A10AC30 | 0     | 0.0   | 0         | 0.0   | 1     | 0.0   | 1     | 0.0   |
| 8     | A10AD01 | 0     | 0.0   | 0         | 0.0   | 1015  | 26.3  | 1015  | 1.7   |
| 9     | A10AD04 | 0     | 0.0   | 0         | 0.0   | 104   | 2.7   | 104   | 0.2   |
| 10    | A10AD05 | 0     | 0.0   | 0         | 0.0   | 2082  | 53.9  | 2082  | 3.6   |
| 11    | A10AE01 | 0     | 0.0   | 0         | 0.0   | 0     | 0.0   | 0     | 0.0   |
| 12    | A10AE02 | 0     | 0.0   | 0         | 0.0   | 1     | 0.0   | 1     | 0.0   |
| 13    | A10AE04 | 12504 | 26.1  | 86        | 1.3   | 0     | 0.0   | 12590 | 21.6  |
| 14    | A10AE05 | 4972  | 10.4  | 28        | 0.4   | 0     | 0.0   | 5000  | 8.6   |
| 15    | Total   | 47926 | 100.0 | 6526      | 100.0 | 3865  | 100.0 | 58317 | 100.0 |

Data 28th December 2011



Table A.3: Number of individuals stratified by gender and by study cohort.

| S.No.                   | Gender | Naive |       | Non-naive |       | Other |       | Total |     |
|-------------------------|--------|-------|-------|-----------|-------|-------|-------|-------|-----|
|                         |        | N     | %     | N         | %     | N     | %     | N     | %   |
| 1                       | Male   | 27247 | 56.9  | 3400      | 52.1  | 2017  | 52.2  | 32664 | 56  |
| 2                       | Female | 20679 | 43.1  | 3126      | 47.9  | 1848  | 47.8  | 25653 | 44  |
| 3                       | Total  | 47926 | 100.0 | 6526      | 100.0 | 3865  | 100.0 | 58317 | 100 |
| Data 28th December 2011 |        |       |       |           |       |       |       |       |     |

Table A.4: Number of individuals stratified by gender and by first insulin in the naive cohort.

| S.No.                   | Gender | NPH   |       | Detemir |       | Glargine |       | Total |       |
|-------------------------|--------|-------|-------|---------|-------|----------|-------|-------|-------|
|                         |        | N     | %     | N       | %     | N        | %     | N     | %     |
| 1                       | Male   | 16996 | 55.8  | 2920    | 58.7  | 7331     | 58.6  | 27247 | 56.9  |
| 2                       | Female | 13454 | 44.2  | 2052    | 41.3  | 5173     | 41.4  | 20679 | 43.1  |
| 3                       | Total  | 30450 | 100.0 | 4972    | 100.0 | 12504    | 100.0 | 47926 | 100.0 |
| Data 28th December 2011 |        |       |       |         |       |          |       |       |       |

Table A.5: Number of individuals stratified by age at start of follow-up (10-year age groups) and by study cohort.

| S.No.                   | Age group | Naive |       | Non-naive |       | Other |       | Total |       |
|-------------------------|-----------|-------|-------|-----------|-------|-------|-------|-------|-------|
|                         |           | N     | %     | N         | %     | N     | %     | N     | %     |
| 1                       | 0-9       | 49    | 0.1   | 9         | 0.1   | 0     | 0.0   | 58    | 0.1   |
| 2                       | 10-19     | 99    | 0.2   | 34        | 0.5   | 0     | 0.0   | 133   | 0.2   |
| 3                       | 20-29     | 350   | 0.7   | 77        | 1.2   | 15    | 0.4   | 442   | 0.8   |
| 4                       | 30-39     | 1510  | 3.2   | 270       | 4.1   | 87    | 2.3   | 1867  | 3.2   |
| 5                       | 40-49     | 4609  | 9.6   | 778       | 11.9  | 225   | 5.8   | 5612  | 9.6   |
| 6                       | 50-59     | 12095 | 25.2  | 1816      | 27.8  | 596   | 15.4  | 14507 | 24.9  |
| 7                       | 60-69     | 13010 | 27.1  | 1620      | 24.8  | 958   | 24.8  | 15588 | 26.7  |
| 8                       | 70-79     | 10452 | 21.8  | 1419      | 21.7  | 1168  | 30.2  | 13039 | 22.4  |
| 9                       | 80+       | 5752  | 12.0  | 503       | 7.7   | 816   | 21.1  | 7071  | 12.1  |
| 10                      | Total     | 47926 | 100.0 | 6526      | 100.0 | 3865  | 100.0 | 58317 | 100.0 |
| Data 28th December 2011 |           |       |       |           |       |       |       |       |       |

Table A.6: Number of individuals stratified by age at start of follow-up (10-year age groups) and by first insulin in the naive cohort.

| S.No.                   | Age group | NPH   |       | Detemir |       | Glargine |       | Total |       |
|-------------------------|-----------|-------|-------|---------|-------|----------|-------|-------|-------|
|                         |           | N     | %     | N       | %     | N        | %     | N     | %     |
| 1                       | 0-9       | 35    | 0.1   | 5       | 0.1   | 9        | 0.1   | 49    | 0.1   |
| 2                       | 10-19     | 53    | 0.2   | 19      | 0.4   | 27       | 0.2   | 99    | 0.2   |
| 3                       | 20-29     | 236   | 0.8   | 35      | 0.7   | 79       | 0.6   | 350   | 0.7   |
| 4                       | 30-39     | 1055  | 3.5   | 152     | 3.1   | 303      | 2.4   | 1510  | 3.2   |
| 5                       | 40-49     | 2943  | 9.7   | 507     | 10.2  | 1159     | 9.3   | 4609  | 9.6   |
| 6                       | 50-59     | 7920  | 26.0  | 1238    | 24.9  | 2937     | 23.5  | 12095 | 25.2  |
| 7                       | 60-69     | 8192  | 26.9  | 1483    | 29.8  | 3335     | 26.7  | 13010 | 27.1  |
| 8                       | 70-79     | 6633  | 21.8  | 1000    | 20.1  | 2819     | 22.5  | 10452 | 21.8  |
| 9                       | 80+       | 3383  | 11.1  | 533     | 10.7  | 1836     | 14.7  | 5752  | 12.0  |
| 10                      | Total     | 30450 | 100.0 | 4972    | 100.0 | 12504    | 100.0 | 47926 | 100.0 |
| Data 28th December 2011 |           |       |       |         |       |          |       |       |       |

Table A.7: Number of individuals stratified by calendar year at start of follow-up and by study cohort.

| S.No.                   | Calendar year | Naive |       | Non-naive |       | Other |       | Total |       |
|-------------------------|---------------|-------|-------|-----------|-------|-------|-------|-------|-------|
|                         |               | N     | %     | N         | %     | N     | %     | N     | %     |
| 1                       | 2000          | 2989  | 6.2   | 6037      | 92.5  | 638   | 16.5  | 9664  | 16.6  |
| 2                       | 2001          | 3290  | 6.9   | 110       | 1.7   | 220   | 5.7   | 3620  | 6.2   |
| 3                       | 2002          | 3612  | 7.5   | 69        | 1.1   | 213   | 5.5   | 3894  | 6.7   |
| 4                       | 2003          | 4137  | 8.6   | 65        | 1.0   | 229   | 5.9   | 4431  | 7.6   |
| 5                       | 2004          | 4707  | 9.8   | 63        | 1.0   | 268   | 6.9   | 5038  | 8.6   |
| 6                       | 2005          | 4576  | 9.5   | 40        | 0.6   | 313   | 8.1   | 4929  | 8.5   |
| 7                       | 2006          | 4321  | 9.0   | 44        | 0.7   | 434   | 11.2  | 4799  | 8.2   |
| 8                       | 2007          | 6083  | 12.7  | 33        | 0.5   | 728   | 18.8  | 6844  | 11.7  |
| 9                       | 2008          | 7071  | 14.8  | 39        | 0.6   | 492   | 12.7  | 7602  | 13.0  |
| 10                      | 2009          | 7140  | 14.9  | 26        | 0.4   | 330   | 8.5   | 7496  | 12.9  |
| 11                      | Total         | 47926 | 100.0 | 6526      | 100.0 | 3865  | 100.0 | 58317 | 100.0 |
| Data 28th December 2011 |               |       |       |           |       |       |       |       |       |

Table A.8: Number of individuals stratified by calendar year at start of follow-up and by first insulin in the naive cohort.

| S.No.                   | Calendar year | NPH   |       | Detemir |       | Glargine |       | Total |       |
|-------------------------|---------------|-------|-------|---------|-------|----------|-------|-------|-------|
|                         |               | N     | %     | N       | %     | N        | %     | N     | %     |
| 1                       | 2000          | 2989  | 9.8   | 0       | 0.0   | 0        | 0.0   | 2989  | 6.2   |
| 2                       | 2001          | 3290  | 10.8  | 0       | 0.0   | 0        | 0.0   | 3290  | 6.9   |
| 3                       | 2002          | 3612  | 11.9  | 0       | 0.0   | 0        | 0.0   | 3612  | 7.5   |
| 4                       | 2003          | 3874  | 12.7  | 0       | 0.0   | 263      | 2.1   | 4137  | 8.6   |
| 5                       | 2004          | 4002  | 13.1  | 0       | 0.0   | 705      | 5.6   | 4707  | 9.8   |
| 6                       | 2005          | 3831  | 12.6  | 18      | 0.4   | 727      | 5.8   | 4576  | 9.5   |
| 7                       | 2006          | 3779  | 12.4  | 63      | 1.3   | 479      | 3.8   | 4321  | 9.0   |
| 8                       | 2007          | 2631  | 8.6   | 771     | 15.5  | 2681     | 21.4  | 6083  | 12.7  |
| 9                       | 2008          | 1490  | 4.9   | 1763    | 35.5  | 3818     | 30.5  | 7071  | 14.8  |
| 10                      | 2009          | 952   | 3.1   | 2357    | 47.4  | 3831     | 30.6  | 7140  | 14.9  |
| 11                      | Total         | 30450 | 100.0 | 4972    | 100.0 | 12504    | 100.0 | 47926 | 100.0 |
| Data 28th December 2011 |               |       |       |         |       |          |       |       |       |

Table A.9: Number of individuals stratified by calendar year of reimbursement decision (5-year age groups) and by study cohort.

| S.No.                   | Year of diagnose | Naive |       | Non-naive |       | Other |       | Total |       |
|-------------------------|------------------|-------|-------|-----------|-------|-------|-------|-------|-------|
|                         |                  | N     | %     | N         | %     | N     | %     | N     | %     |
| 1                       | 1965-1969        | 0     | 0.0   | 1         | 0.0   | 0     | 0.0   | 1     | 0.0   |
| 2                       | 1970-1974        | 2     | 0.0   | 4         | 0.1   | 1     | 0.0   | 7     | 0.0   |
| 3                       | 1975-1979        | 3     | 0.0   | 3         | 0.0   | 0     | 0.0   | 6     | 0.0   |
| 4                       | 1980-1984        | 2     | 0.0   | 10        | 0.2   | 1     | 0.0   | 13    | 0.0   |
| 5                       | 1985-1989        | 18    | 0.0   | 35        | 0.5   | 5     | 0.1   | 58    | 0.1   |
| 6                       | 1990-1994        | 1410  | 2.9   | 1494      | 22.9  | 174   | 4.5   | 3078  | 5.3   |
| 7                       | 1995-1999        | 11606 | 24.2  | 4475      | 68.6  | 1007  | 26.1  | 17088 | 29.3  |
| 8                       | 2000-2004        | 20665 | 43.1  | 426       | 6.5   | 1438  | 37.2  | 22529 | 38.6  |
| 9                       | 2005-2009        | 13170 | 27.5  | 69        | 1.1   | 1149  | 29.7  | 14388 | 24.7  |
| 10                      | 2010             | 1050  | 2.2   | 9         | 0.1   | 90    | 2.3   | 1149  | 2.0   |
| 11                      | Total            | 47926 | 100.0 | 6526      | 100.0 | 3865  | 100.0 | 58317 | 100.0 |
| Data 28th December 2011 |                  |       |       |           |       |       |       |       |       |

Table A.10: Number of individuals stratified by calendar year of reimbursement decision (5-year age groups) and by first insulin in the naive cohort.

| S.No.                   | Year of diagnose | NPH   |       | Detemir |       | Glargine |       | Total |       |
|-------------------------|------------------|-------|-------|---------|-------|----------|-------|-------|-------|
|                         |                  | N     | %     | N       | %     | N        | %     | N     | %     |
| 1                       | 1970-1974        | 2     | 0.0   | 0       | 0.0   | 0        | 0.0   | 2     | 0.0   |
| 2                       | 1975-1979        | 2     | 0.0   | 0       | 0.0   | 1        | 0.0   | 3     | 0.0   |
| 3                       | 1980-1984        | 2     | 0.0   | 0       | 0.0   | 0        | 0.0   | 2     | 0.0   |
| 4                       | 1985-1989        | 16    | 0.1   | 0       | 0.0   | 2        | 0.0   | 18    | 0.0   |
| 5                       | 1990-1994        | 1133  | 3.7   | 50      | 1.0   | 227      | 1.8   | 1410  | 2.9   |
| 6                       | 1995-1999        | 9030  | 29.7  | 585     | 11.8  | 1991     | 15.9  | 11606 | 24.2  |
| 7                       | 2000-2004        | 14195 | 46.6  | 1760    | 35.4  | 4710     | 37.7  | 20665 | 43.1  |
| 8                       | 2005-2009        | 5748  | 18.9  | 2328    | 46.8  | 5094     | 40.7  | 13170 | 27.5  |
| 9                       | 2010             | 322   | 1.1   | 249     | 5.0   | 479      | 3.8   | 1050  | 2.2   |
| 10                      | Total            | 30450 | 100.0 | 4972    | 100.0 | 12504    | 100.0 | 47926 | 100.0 |
| Data 28th December 2011 |                  |       |       |         |       |          |       |       |       |

Table A.11: Number of individuals stratified by hospital district at start of follow-up and by study cohort.

| S.No. | Hosp. District    | Naive |       | Non-naive |       | Other |       | Total |       |
|-------|-------------------|-------|-------|-----------|-------|-------|-------|-------|-------|
|       |                   | N     | %     | N         | %     | N     | %     | N     | %     |
| 1     | Unknown           | 6302  | 13.1  | 6151      | 94.3  | 862   | 22.3  | 13315 | 22.8  |
| 2     | HUS               | 9388  | 19.6  | 101       | 1.5   | 477   | 12.3  | 9966  | 17.1  |
| 3     | Varsinais-Suomi   | 2969  | 6.2   | 15        | 0.2   | 180   | 4.7   | 3164  | 5.4   |
| 4     | Satakunta         | 1962  | 4.1   | 14        | 0.2   | 146   | 3.8   | 2122  | 3.6   |
| 5     | Kantahame         | 1476  | 3.1   | 6         | 0.1   | 130   | 3.4   | 1612  | 2.8   |
| 6     | Pirkanmaa         | 3801  | 7.9   | 19        | 0.3   | 251   | 6.5   | 4071  | 7.0   |
| 7     | Paijat-Hame       | 1800  | 3.8   | 27        | 0.4   | 104   | 2.7   | 1931  | 3.3   |
| 8     | Kymenlaakso       | 1652  | 3.4   | 14        | 0.2   | 95    | 2.5   | 1761  | 3.0   |
| 9     | Etela-Karjala     | 1127  | 2.4   | 9         | 0.1   | 39    | 1.0   | 1175  | 2.0   |
| 10    | Etela-Savo        | 982   | 2.0   | 9         | 0.1   | 65    | 1.7   | 1056  | 1.8   |
| 11    | Ita-Savo          | 705   | 1.5   | 6         | 0.1   | 32    | 0.8   | 743   | 1.3   |
| 12    | Pohjois-Karjala   | 1822  | 3.8   | 17        | 0.3   | 126   | 3.3   | 1965  | 3.4   |
| 13    | Pohjois-Savo      | 2252  | 4.7   | 25        | 0.4   | 246   | 6.4   | 2523  | 4.3   |
| 14    | Keski-Suomi       | 2128  | 4.4   | 37        | 0.6   | 178   | 4.6   | 2343  | 4.0   |
| 15    | Etela-Pohjanmaa   | 2345  | 4.9   | 23        | 0.4   | 246   | 6.4   | 2614  | 4.5   |
| 16    | Vaasa             | 823   | 1.7   | 9         | 0.1   | 270   | 7.0   | 1102  | 1.9   |
| 17    | Keski-Pohjanmaa   | 727   | 1.5   | 6         | 0.1   | 104   | 2.7   | 837   | 1.4   |
| 18    | Pohjois-Pohjanmaa | 2880  | 6.0   | 21        | 0.3   | 148   | 3.8   | 3049  | 5.2   |
| 19    | Kainuu            | 969   | 2.0   | 8         | 0.1   | 33    | 0.9   | 1010  | 1.7   |
| 20    | Lansi-Pohja       | 701   | 1.5   | 2         | 0.0   | 64    | 1.7   | 767   | 1.3   |
| 21    | Lappi             | 1031  | 2.2   | 6         | 0.1   | 50    | 1.3   | 1087  | 1.9   |
| 22    | Ahvenanmaa        | 84    | 0.2   | 1         | 0.0   | 19    | 0.5   | 104   | 0.2   |
| 23    | Total             | 47926 | 100.0 | 6526      | 100.0 | 3865  | 100.0 | 58317 | 100.0 |

Data 28th December 2011

Table A.12: Number of individuals stratified by hospital district at start of follow-up and by first insulin in the naive cohort.

| S.No. | Hosp. District    | NPH   |       | Detemir |       | Glargine |       | Total |       |
|-------|-------------------|-------|-------|---------|-------|----------|-------|-------|-------|
|       |                   | N     | %     | N       | %     | N        | %     | N     | %     |
| 1     | Unknown           | 6288  | 20.7  | 2       | 0.0   | 12       | 0.1   | 6302  | 13.1  |
| 2     | HUS               | 5472  | 18.0  | 1034    | 20.8  | 2882     | 23.0  | 9388  | 19.6  |
| 3     | Varsinais-Suomi   | 1468  | 4.8   | 375     | 7.5   | 1126     | 9.0   | 2969  | 6.2   |
| 4     | Satakunta         | 1158  | 3.8   | 351     | 7.1   | 453      | 3.6   | 1962  | 4.1   |
| 5     | Kantahame         | 823   | 2.7   | 130     | 2.6   | 523      | 4.2   | 1476  | 3.1   |
| 6     | Pirkanmaa         | 2311  | 7.6   | 387     | 7.8   | 1103     | 8.8   | 3801  | 7.9   |
| 7     | Paijat-Hame       | 1130  | 3.7   | 188     | 3.8   | 482      | 3.9   | 1800  | 3.8   |
| 8     | Kymenlaakso       | 993   | 3.3   | 196     | 3.9   | 463      | 3.7   | 1652  | 3.4   |
| 9     | Etela-Karjala     | 625   | 2.1   | 109     | 2.2   | 393      | 3.1   | 1127  | 2.4   |
| 10    | Etela-Savo        | 640   | 2.1   | 123     | 2.5   | 219      | 1.8   | 982   | 2.0   |
| 11    | Ita-Savo          | 438   | 1.4   | 70      | 1.4   | 197      | 1.6   | 705   | 1.5   |
| 12    | Pohjois-Karjala   | 1150  | 3.8   | 268     | 5.4   | 404      | 3.2   | 1822  | 3.8   |
| 13    | Pohjois-Savo      | 1139  | 3.7   | 256     | 5.1   | 857      | 6.9   | 2252  | 4.7   |
| 14    | Keski-Suomi       | 1252  | 4.1   | 294     | 5.9   | 582      | 4.7   | 2128  | 4.4   |
| 15    | Etela-Pohjanmaa   | 1255  | 4.1   | 437     | 8.8   | 653      | 5.2   | 2345  | 4.9   |
| 16    | Vaasa             | 498   | 1.6   | 160     | 3.2   | 165      | 1.3   | 823   | 1.7   |
| 17    | Keski-Pohjanmaa   | 439   | 1.4   | 114     | 2.3   | 174      | 1.4   | 727   | 1.5   |
| 18    | Pohjois-Pohjanmaa | 1574  | 5.2   | 260     | 5.2   | 1046     | 8.4   | 2880  | 6.0   |
| 19    | Kainuu            | 618   | 2.0   | 84      | 1.7   | 267      | 2.1   | 969   | 2.0   |
| 20    | Lansi-Pohja       | 421   | 1.4   | 45      | 0.9   | 235      | 1.9   | 701   | 1.5   |
| 21    | Lappi             | 683   | 2.2   | 86      | 1.7   | 262      | 2.1   | 1031  | 2.2   |
| 22    | Ahvenanmaa        | 75    | 0.2   | 3       | 0.1   | 6        | 0.0   | 84    | 0.2   |
| 23    | Total             | 30450 | 100.0 | 4972    | 100.0 | 12504    | 100.0 | 47926 | 100.0 |

Data 28th December 2011

## B Appendix 2: Crude rate estimates for *first* severe hypoglycemic coma event

Table B.13: The number/risk time/incidence rate (95% CI) of first hypoglycemic coma event for detemir insulin, glargine insulin, and NPH-insulin stratified by gender.

| S.No. | Gender | Insulin  | Npat  | Events | Years | Rate  | lower limit | upper limit |
|-------|--------|----------|-------|--------|-------|-------|-------------|-------------|
| 1     | Male   | glargine | 11633 | 386    | 19811 | 19.48 | 17.63       | 21.53       |
| 2     | Male   | detemir  | 5329  | 75     | 5784  | 12.97 | 10.34       | 16.26       |
| 3     | Male   | NPH      | 17111 | 1112   | 53663 | 20.72 | 19.54       | 21.98       |
| 4     | Male   | no DGN   | 18993 | 241    | 14210 | 16.96 | 14.95       | 19.24       |
| 5     | Female | glargine | 8455  | 274    | 14147 | 19.37 | 17.21       | 21.80       |
| 6     | Female | detemir  | 3976  | 60     | 4337  | 13.84 | 10.74       | 17.82       |
| 7     | Female | NPH      | 13596 | 825    | 42501 | 19.41 | 18.13       | 20.78       |
| 8     | Female | no DGN   | 14795 | 233    | 13165 | 17.70 | 15.57       | 20.12       |
| 9     | Total  | glargine | 20088 | 660    | 33958 | 19.44 | 18.01       | 20.98       |
| 10    | Total  | detemir  | 9305  | 135    | 10120 | 13.34 | 11.27       | 15.79       |
| 11    | Total  | NPH      | 30707 | 1937   | 96164 | 20.14 | 19.27       | 21.06       |
| 12    | Total  | no DGN   | 33788 | 474    | 27375 | 17.32 | 15.82       | 18.95       |

Naive T2 cohort. Data 28th December 2011



Table B.14: The number/risk time/incidence rate (95% CI) of first hypoglycemic coma event for detemir insulin, glargine insulin, and NPH-insulin stratified by age at start of follow up.

| S.No. | Age group | Insulin  | Npat  | Events | Years | Rate  | lower limit | upper limit |
|-------|-----------|----------|-------|--------|-------|-------|-------------|-------------|
| 1     | 0-9       | glargine | 23    | 0      | 49    | NA    | NA          | NA          |
| 2     | 0-9       | detemir  | 27    | 0      | 45    | NA    | NA          | NA          |
| 3     | 0-9       | NPH      | 37    | 1      | 106   | 9.44  | 1.33        | 67.01       |
| 4     | 0-9       | no DGN   | 38    | 0      | 26    | NA    | NA          | NA          |
| 5     | 10-19     | glargine | 51    | 4      | 141   | 28.44 | 10.68       | 75.79       |
| 6     | 10-19     | detemir  | 36    | 0      | 53    | NA    | NA          | NA          |
| 7     | 10-19     | NPH      | 54    | 4      | 136   | 29.50 | 11.07       | 78.61       |
| 8     | 10-19     | no DGN   | 76    | 3      | 94    | 31.81 | 10.26       | 98.64       |
| 9     | 20-29     | glargine | 145   | 4      | 271   | 14.77 | 5.54        | 39.34       |
| 10    | 20-29     | detemir  | 85    | 0      | 115   | NA    | NA          | NA          |
| 11    | 20-29     | NPH      | 239   | 11     | 531   | 20.73 | 11.48       | 37.43       |
| 12    | 20-29     | no DGN   | 281   | 9      | 570   | 15.80 | 8.22        | 30.37       |
| 13    | 30-39     | glargine | 620   | 22     | 1145  | 19.21 | 12.65       | 29.17       |
| 14    | 30-39     | detemir  | 356   | 4      | 443   | 9.03  | 3.39        | 24.07       |
| 15    | 30-39     | NPH      | 1064  | 56     | 2963  | 18.90 | 14.55       | 24.56       |
| 16    | 30-39     | no DGN   | 1227  | 10     | 2114  | 4.73  | 2.54        | 8.79        |
| 17    | 40-49     | glargine | 2112  | 75     | 3938  | 19.05 | 15.19       | 23.88       |
| 18    | 40-49     | detemir  | 1169  | 18     | 1427  | 12.61 | 7.95        | 20.02       |
| 19    | 40-49     | NPH      | 2970  | 183    | 9672  | 18.92 | 16.37       | 21.87       |
| 20    | 40-49     | no DGN   | 3532  | 51     | 3230  | 15.79 | 12.00       | 20.78       |
| 21    | 50-59     | glargine | 5381  | 161    | 10065 | 16.00 | 13.71       | 18.67       |
| 22    | 50-59     | detemir  | 2710  | 38     | 3146  | 12.08 | 8.79        | 16.60       |
| 23    | 50-59     | NPH      | 7986  | 458    | 28192 | 16.25 | 14.82       | 17.80       |
| 24    | 50-59     | no DGN   | 8974  | 116    | 6989  | 16.60 | 13.84       | 19.91       |
| 25    | 60-69     | glargine | 5401  | 173    | 9153  | 18.90 | 16.28       | 21.94       |
| 26    | 60-69     | detemir  | 2634  | 33     | 2800  | 11.79 | 8.38        | 16.58       |
| 27    | 60-69     | NPH      | 8248  | 549    | 27773 | 19.77 | 18.18       | 21.49       |
| 28    | 60-69     | no DGN   | 8957  | 119    | 6183  | 19.25 | 16.08       | 23.03       |
| 29    | 70-79     | glargine | 4072  | 145    | 6297  | 23.03 | 19.57       | 27.10       |
| 30    | 70-79     | detemir  | 1592  | 31     | 1525  | 20.33 | 14.30       | 28.90       |
| 31    | 70-79     | NPH      | 6691  | 475    | 19856 | 23.92 | 21.86       | 26.17       |
| 32    | 70-79     | no DGN   | 7043  | 106    | 5474  | 19.37 | 16.01       | 23.43       |
| 33    | 80+       | glargine | 2283  | 76     | 2900  | 26.21 | 20.93       | 32.81       |
| 34    | 80+       | detemir  | 696   | 11     | 566   | 19.42 | 10.76       | 35.06       |
| 35    | 80+       | NPH      | 3418  | 200    | 6936  | 28.83 | 25.10       | 33.12       |
| 36    | 80+       | no DGN   | 3660  | 60     | 2695  | 22.26 | 17.29       | 28.67       |
| 37    | Total     | glargine | 20088 | 660    | 33958 | 19.44 | 18.01       | 20.98       |
| 38    | Total     | detemir  | 9305  | 135    | 10120 | 13.34 | 11.27       | 15.79       |
| 39    | Total     | NPH      | 30707 | 1937   | 96164 | 20.14 | 19.27       | 21.06       |
| 40    | Total     | no DGN   | 33788 | 474    | 27375 | 17.32 | 15.82       | 18.95       |

Naive T2 cohort. Data 28th December 2011

Table B.15: The number/risk time/incidence rate (95% CI) of first hypoglycemic coma event for detemir insulin, glargine insulin, and NPH-insulin stratified by calendar year at start of follow-up.

| S.No. | Calender year | Insulin  | Npat  | Events | Years | Rate  | lower limit | upper limit |
|-------|---------------|----------|-------|--------|-------|-------|-------------|-------------|
| 1     | 00-05         | glargine | 7262  | 361    | 17841 | 20.23 | 18.25       | 22.43       |
| 2     | 00-05         | detemir  | 2876  | 35     | 3775  | 9.27  | 6.66        | 12.91       |
| 3     | 00-05         | NPH      | 21741 | 1654   | 81985 | 20.17 | 19.23       | 21.17       |
| 4     | 00-05         | no DGN   | 20618 | 397    | 22862 | 17.36 | 15.74       | 19.16       |
| 5     | 06            | glargine | 1404  | 52     | 2629  | 19.78 | 15.07       | 25.96       |
| 6     | 06            | detemir  | 675   | 11     | 880   | 12.50 | 6.92        | 22.57       |
| 7     | 06            | NPH      | 3794  | 154    | 7898  | 19.50 | 16.65       | 22.83       |
| 8     | 06            | no DGN   | 3360  | 36     | 2006  | 17.95 | 12.95       | 24.88       |
| 9     | 07            | glargine | 3300  | 120    | 6227  | 19.27 | 16.11       | 23.05       |
| 10    | 07            | detemir  | 1246  | 27     | 1955  | 13.81 | 9.47        | 20.14       |
| 11    | 07            | NPH      | 2668  | 77     | 4269  | 18.04 | 14.43       | 22.55       |
| 12    | 07            | no DGN   | 4246  | 32     | 1497  | 21.38 | 15.12       | 30.23       |
| 13    | 08            | glargine | 4155  | 97     | 5334  | 18.18 | 14.90       | 22.19       |
| 14    | 08            | detemir  | 2049  | 45     | 2450  | 18.37 | 13.71       | 24.60       |
| 15    | 08            | NPH      | 1525  | 37     | 1612  | 22.95 | 16.63       | 31.67       |
| 16    | 08            | no DGN   | 3746  | 7      | 777   | 9.01  | 4.30        | 18.91       |
| 17    | 09            | glargine | 3967  | 30     | 1927  | 15.57 | 10.89       | 22.27       |
| 18    | 09            | detemir  | 2459  | 17     | 1060  | 16.03 | 9.97        | 25.79       |
| 19    | 09            | NPH      | 979   | 15     | 399   | 37.58 | 22.66       | 62.34       |
| 20    | 09            | no DGN   | 1818  | 2      | 233   | 8.57  | 2.14        | 34.28       |
| 21    | Total         | glargine | 20088 | 660    | 33958 | 19.44 | 18.01       | 20.98       |
| 22    | Total         | detemir  | 9305  | 135    | 10120 | 13.34 | 11.27       | 15.79       |
| 23    | Total         | NPH      | 30707 | 1937   | 96164 | 20.14 | 19.27       | 21.06       |
| 24    | Total         | no DGN   | 33788 | 474    | 27375 | 17.32 | 15.82       | 18.95       |

Naive T2 cohort. Data 28th December 2011

Table B.16: The number/risk time/incidence rate (95% CI) of first hypoglycemic coma event for detemir insulin, glargine insulin, and NPH-insulin stratified by calendar time since diagnose (first reimbursement decision or purchase).

| S.No. | Time since diag | Insulin  | Npat  | Events | Years | Rate  | lower limit | upper limit |
|-------|-----------------|----------|-------|--------|-------|-------|-------------|-------------|
| 1     | -1              | glargine | 4673  | 147    | 7533  | 19.51 | 16.60       | 22.94       |
| 2     | -1              | detemir  | 2344  | 23     | 2574  | 8.94  | 5.94        | 13.45       |
| 3     | -1              | NPH      | 8605  | 550    | 25113 | 21.90 | 20.14       | 23.81       |
| 4     | -1              | no DGN   | 9046  | 132    | 11127 | 11.86 | 10.00       | 14.07       |
| 5     | 1-2             | glargine | 1549  | 51     | 2759  | 18.49 | 14.05       | 24.33       |
| 6     | 1-2             | detemir  | 748   | 9      | 916   | 9.83  | 5.11        | 18.89       |
| 7     | 1-2             | NPH      | 2610  | 193    | 8692  | 22.21 | 19.28       | 25.57       |
| 8     | 1-2             | no DGN   | 2784  | 44     | 2213  | 19.88 | 14.80       | 26.72       |
| 9     | 2-5             | glargine | 5205  | 197    | 9632  | 20.45 | 17.79       | 23.52       |
| 10    | 2-5             | detemir  | 2469  | 35     | 2740  | 12.77 | 9.17        | 17.79       |
| 11    | 2-5             | NPH      | 8850  | 556    | 31188 | 17.83 | 16.41       | 19.37       |
| 12    | 2-5             | no DGN   | 9627  | 132    | 6827  | 19.33 | 16.30       | 22.93       |
| 13    | 5-10            | glargine | 6679  | 214    | 11451 | 18.69 | 16.35       | 21.37       |
| 14    | 5-10            | detemir  | 2950  | 42     | 3151  | 13.33 | 9.85        | 18.03       |
| 15    | 5-10            | NPH      | 9203  | 569    | 28465 | 19.99 | 18.41       | 21.70       |
| 16    | 5-10            | no DGN   | 10416 | 152    | 6430  | 23.64 | 20.17       | 27.71       |
| 17    | 10-             | glargine | 1982  | 51     | 2584  | 19.74 | 15.00       | 25.97       |
| 18    | 10-             | detemir  | 794   | 26     | 739   | 35.18 | 23.95       | 51.67       |
| 19    | 10-             | NPH      | 1439  | 69     | 2706  | 25.50 | 20.14       | 32.29       |
| 20    | 10-             | no DGN   | 1915  | 14     | 778   | 17.99 | 10.66       | 30.38       |
| 21    | Total           | glargine | 20088 | 660    | 33958 | 19.44 | 18.01       | 20.98       |
| 22    | Total           | detemir  | 9305  | 135    | 10120 | 13.34 | 11.27       | 15.79       |
| 23    | Total           | NPH      | 30707 | 1937   | 96164 | 20.14 | 19.27       | 21.06       |
| 24    | Total           | no DGN   | 33788 | 474    | 27375 | 17.32 | 15.82       | 18.95       |

Naive T2 cohort. Data 28th December 2011

Table B.17: The number/risk time/incidence rate (95% CI) of first hypoglycemic coma event for detemir insulin, glargine insulin, and NPH-insulin stratified by history use of oral diabetes medication (A10BB) at start of follow-up.

| S.No. | A10BB hist | Insulin  | Npat  | Events | Years | Rate  | lower limit | upper limit |
|-------|------------|----------|-------|--------|-------|-------|-------------|-------------|
| 1     | No         | glargine | 5404  | 161    | 7885  | 20.42 | 17.50       | 23.83       |
| 2     | No         | detemir  | 2907  | 33     | 2961  | 11.14 | 7.92        | 15.68       |
| 3     | No         | NPH      | 8433  | 470    | 23533 | 19.97 | 18.25       | 21.86       |
| 4     | No         | no DGN   | 9254  | 128    | 10356 | 12.36 | 10.39       | 14.70       |
| 5     | Yes        | glargine | 14684 | 499    | 26073 | 19.14 | 17.53       | 20.89       |
| 6     | Yes        | detemir  | 6398  | 102    | 7159  | 14.25 | 11.73       | 17.30       |
| 7     | Yes        | NPH      | 22274 | 1467   | 72631 | 20.20 | 19.19       | 21.26       |
| 8     | Yes        | no DGN   | 24534 | 346    | 17018 | 20.33 | 18.30       | 22.59       |
| 9     | Total      | glargine | 20088 | 660    | 33958 | 19.44 | 18.01       | 20.98       |
| 10    | Total      | detemir  | 9305  | 135    | 10120 | 13.34 | 11.27       | 15.79       |
| 11    | Total      | NPH      | 30707 | 1937   | 96164 | 20.14 | 19.27       | 21.06       |
| 12    | Total      | no DGN   | 33788 | 474    | 27375 | 17.32 | 15.82       | 18.95       |

Naive T2 cohort. Data 28th December 2011

Table B.18: The number/risk time/incidence rate (95% CI) of first hypoglycemic coma event for detemir insulin, glargine insulin, and NPH-insulin stratified by history use of insulin medication (A10A) at start of follow-up.

| S.No. | A10A hist | Insulin  | Npat  | Events | Years | Rate  | lower limit | upper limit |
|-------|-----------|----------|-------|--------|-------|-------|-------------|-------------|
| 1     | No        | glargine | 19086 | 608    | 32258 | 18.85 | 17.41       | 20.41       |
| 2     | No        | detemir  | 8756  | 124    | 9468  | 13.10 | 10.98       | 15.62       |
| 3     | No        | NPH      | 29471 | 1852   | 93314 | 19.85 | 18.96       | 20.77       |
| 4     | No        | no DGN   | 32352 | 449    | 25965 | 17.29 | 15.76       | 18.97       |
| 5     | Yes       | glargine | 1002  | 52     | 1700  | 30.59 | 23.31       | 40.14       |
| 6     | Yes       | detemir  | 549   | 11     | 653   | 16.85 | 9.33        | 30.43       |
| 7     | Yes       | NPH      | 1236  | 85     | 2849  | 29.83 | 24.12       | 36.90       |
| 8     | Yes       | no DGN   | 1436  | 25     | 1409  | 17.74 | 11.99       | 26.25       |
| 9     | Total     | glargine | 20088 | 660    | 33958 | 19.44 | 18.01       | 20.98       |
| 10    | Total     | detemir  | 9305  | 135    | 10120 | 13.34 | 11.27       | 15.79       |
| 11    | Total     | NPH      | 30707 | 1937   | 96164 | 20.14 | 19.27       | 21.06       |
| 12    | Total     | no DGN   | 33788 | 474    | 27375 | 17.32 | 15.82       | 18.95       |

Naive T2 cohort. Data 28th December 2011

Table B.19: The number/risk time/incidence rate (95% CI) of first hypoglycemic coma event for detemir insulin, glargine insulin, and NPH-insulin stratified by hospitalization history at start of follow-up.

| S.No. | Hosp hist | Insulin  | Npat  | Events | Years | Rate  | lower limit | upper limit |
|-------|-----------|----------|-------|--------|-------|-------|-------------|-------------|
| 1     | No        | glargine | 18645 | 515    | 31821 | 16.18 | 14.85       | 17.64       |
| 2     | No        | detemir  | 8778  | 106    | 9645  | 10.99 | 9.09        | 13.30       |
| 3     | No        | NPH      | 28631 | 1494   | 91671 | 16.30 | 15.49       | 17.15       |
| 4     | No        | no DGN   | 31778 | 419    | 25931 | 16.16 | 14.68       | 17.78       |
| 5     | Yes       | glargine | 1443  | 145    | 2137  | 67.85 | 57.66       | 79.84       |
| 6     | Yes       | detemir  | 527   | 29     | 476   | 60.96 | 42.36       | 87.73       |
| 7     | Yes       | NPH      | 2076  | 443    | 4493  | 98.60 | 89.83       | 108.22      |
| 8     | Yes       | no DGN   | 2010  | 55     | 1444  | 38.09 | 29.24       | 49.61       |
| 9     | Total     | glargine | 20088 | 660    | 33958 | 19.44 | 18.01       | 20.98       |
| 10    | Total     | detemir  | 9305  | 135    | 10120 | 13.34 | 11.27       | 15.79       |
| 11    | Total     | NPH      | 30707 | 1937   | 96164 | 20.14 | 19.27       | 21.06       |
| 12    | Total     | no DGN   | 33788 | 474    | 27375 | 17.32 | 15.82       | 18.95       |

Naive T2 cohort. Data 28th December 2011

Table B.20: The number/risk time/incidence rate (95% CI) of first hypoglycemic coma event for detemir insulin, glargine insulin, and NPH-insulin stratified by hospital district at start of follow-up.

| S.No. | Hosp. District    | Insulin  | Npat  | Events | Years | Rate  | lower limit | upper limit |
|-------|-------------------|----------|-------|--------|-------|-------|-------------|-------------|
| 1     | Unknown           | glargine | 1557  | 73     | 3646  | 20.02 | 15.92       | 25.18       |
| 2     | Unknown           | detemir  | 696   | 10     | 967   | 10.35 | 5.57        | 19.23       |
| 3     | Unknown           | NPH      | 6289  | 578    | 29826 | 19.38 | 17.86       | 21.02       |
| 4     | Unknown           | no DGN   | 5745  | 155    | 8660  | 17.90 | 15.29       | 20.95       |
| 5     | HUS               | glargine | 4441  | 187    | 7434  | 25.16 | 21.80       | 29.03       |
| 6     | HUS               | detemir  | 1895  | 34     | 2111  | 16.10 | 11.51       | 22.54       |
| 7     | HUS               | NPH      | 5533  | 377    | 14580 | 25.86 | 23.37       | 28.60       |
| 8     | HUS               | no DGN   | 6622  | 94     | 4487  | 20.95 | 17.11       | 25.64       |
| 9     | Varsinais-Suomi   | glargine | 1591  | 44     | 2821  | 15.60 | 11.61       | 20.96       |
| 10    | Varsinais-Suomi   | detemir  | 603   | 11     | 650   | 16.92 | 9.37        | 30.56       |
| 11    | Varsinais-Suomi   | NPH      | 1499  | 94     | 4153  | 22.64 | 18.49       | 27.71       |
| 12    | Varsinais-Suomi   | no DGN   | 1962  | 20     | 1167  | 17.14 | 11.06       | 26.57       |
| 13    | Satakunta         | glargine | 671   | 11     | 1027  | 10.72 | 5.93        | 19.35       |
| 14    | Satakunta         | detemir  | 555   | 6      | 585   | 10.26 | 4.61        | 22.85       |
| 15    | Satakunta         | NPH      | 1170  | 60     | 2882  | 20.82 | 16.17       | 26.82       |
| 16    | Satakunta         | no DGN   | 1266  | 10     | 978   | 10.22 | 5.50        | 19.00       |
| 17    | Kantahame         | glargine | 739   | 28     | 1286  | 21.77 | 15.03       | 31.53       |
| 18    | Kantahame         | detemir  | 212   | 1      | 218   | 4.59  | 0.65        | 32.62       |
| 19    | Kantahame         | NPH      | 831   | 76     | 2328  | 32.65 | 26.08       | 40.88       |
| 20    | Kantahame         | no DGN   | 993   | 19     | 606   | 31.33 | 19.99       | 49.12       |
| 21    | Pirkanmaa         | glargine | 1780  | 23     | 2779  | 8.28  | 5.50        | 12.46       |
| 22    | Pirkanmaa         | detemir  | 731   | 7      | 814   | 8.60  | 4.10        | 18.05       |
| 23    | Pirkanmaa         | NPH      | 2328  | 34     | 6715  | 5.06  | 3.62        | 7.09        |
| 24    | Pirkanmaa         | no DGN   | 2648  | 10     | 1779  | 5.62  | 3.02        | 10.45       |
| 25    | Paijat-Hame       | glargine | 692   | 21     | 1134  | 18.52 | 12.08       | 28.41       |
| 26    | Paijat-Hame       | detemir  | 334   | 5      | 356   | 14.04 | 5.84        | 33.74       |
| 27    | Paijat-Hame       | NPH      | 1145  | 115    | 3069  | 37.47 | 31.21       | 44.99       |
| 28    | Paijat-Hame       | no DGN   | 1146  | 18     | 699   | 25.75 | 16.22       | 40.87       |
| 29    | Kymenlaakso       | glargine | 688   | 22     | 1081  | 20.35 | 13.40       | 30.90       |
| 30    | Kymenlaakso       | detemir  | 311   | 4      | 307   | 13.05 | 4.90        | 34.77       |
| 31    | Kymenlaakso       | NPH      | 1004  | 62     | 2841  | 21.82 | 17.02       | 27.99       |
| 32    | Kymenlaakso       | no DGN   | 1133  | 20     | 711   | 28.13 | 18.15       | 43.60       |
| 33    | Etela-Karjala     | glargine | 551   | 21     | 940   | 22.34 | 14.56       | 34.26       |
| 34    | Etela-Karjala     | detemir  | 192   | 5      | 203   | 24.58 | 10.23       | 59.06       |
| 35    | Etela-Karjala     | NPH      | 641   | 33     | 1773  | 18.61 | 13.23       | 26.18       |
| 36    | Etela-Karjala     | no DGN   | 731   | 10     | 478   | 20.92 | 11.26       | 38.89       |
| 37    | Etela-Savo        | glargine | 336   | 7      | 481   | 14.54 | 6.93        | 30.50       |
| 38    | Etela-Savo        | detemir  | 197   | 2      | 208   | 9.63  | 2.41        | 38.52       |
| 39    | Etela-Savo        | NPH      | 646   | 32     | 1757  | 18.21 | 12.88       | 25.75       |
| 40    | Etela-Savo        | no DGN   | 674   | 6      | 460   | 13.03 | 5.85        | 29.01       |
| 41    | Ita-Savo          | glargine | 289   | 3      | 420   | 7.15  | 2.31        | 22.17       |
| 42    | Ita-Savo          | detemir  | 118   | 0      | 97    | NA    | NA          | NA          |
| 43    | Ita-Savo          | NPH      | 440   | 11     | 1236  | 8.90  | 4.93        | 16.07       |
| 44    | Ita-Savo          | no DGN   | 470   | 5      | 367   | 13.64 | 5.68        | 32.76       |
| 45    | Pohjois-Karjala   | glargine | 614   | 5      | 906   | 5.52  | 2.30        | 13.26       |
| 46    | Pohjois-Karjala   | detemir  | 405   | 1      | 366   | 2.73  | 0.38        | 19.39       |
| 47    | Pohjois-Karjala   | NPH      | 1157  | 15     | 3453  | 4.34  | 2.62        | 7.20        |
| 48    | Pohjois-Karjala   | no DGN   | 1165  | 0      | 837   | NA    | NA          | NA          |
| 49    | Pohjois-Savo      | glargine | 1166  | 45     | 2051  | 21.94 | 16.38       | 29.39       |
| 50    | Pohjois-Savo      | detemir  | 426   | 7      | 481   | 14.56 | 6.94        | 30.55       |
| 51    | Pohjois-Savo      | NPH      | 1154  | 68     | 2967  | 22.92 | 18.07       | 29.06       |
| 52    | Pohjois-Savo      | no DGN   | 1506  | 20     | 999   | 20.01 | 12.91       | 31.02       |
| 53    | Keski-Suomi       | glargine | 855   | 29     | 1415  | 20.50 | 14.25       | 29.50       |
| 54    | Keski-Suomi       | detemir  | 514   | 6      | 560   | 10.72 | 4.81        | 23.85       |
| 55    | Keski-Suomi       | NPH      | 1267  | 64     | 3318  | 19.29 | 15.10       | 24.64       |
| 56    | Keski-Suomi       | no DGN   | 1414  | 14     | 966   | 14.49 | 8.58        | 24.47       |
| 57    | Etela-Pohjanmaa   | glargine | 958   | 31     | 1451  | 21.37 | 15.03       | 30.38       |
| 58    | Etela-Pohjanmaa   | detemir  | 721   | 13     | 701   | 18.55 | 10.77       | 31.95       |
| 59    | Etela-Pohjanmaa   | NPH      | 1265  | 102    | 3381  | 30.17 | 24.85       | 36.63       |
| 60    | Etela-Pohjanmaa   | no DGN   | 1497  | 22     | 1004  | 21.90 | 14.42       | 33.26       |
| 61    | Vaasa             | glargine | 249   | 10     | 383   | 26.13 | 14.06       | 48.56       |
| 62    | Vaasa             | detemir  | 280   | 5      | 269   | 18.57 | 7.73        | 44.62       |
| 63    | Vaasa             | NPH      | 498   | 30     | 1400  | 21.43 | 14.99       | 30.66       |
| 64    | Vaasa             | no DGN   | 560   | 10     | 432   | 23.16 | 12.46       | 43.05       |
| 65    | Keski-Pohjanmaa   | glargine | 237   | 3      | 300   | 10.00 | 3.22        | 31.00       |
| 66    | Keski-Pohjanmaa   | detemir  | 198   | 1      | 193   | 5.19  | 0.73        | 36.81       |
| 67    | Keski-Pohjanmaa   | NPH      | 441   | 6      | 1409  | 4.26  | 1.91        | 9.48        |
| 68    | Keski-Pohjanmaa   | no DGN   | 469   | 1      | 323   | 3.09  | 0.44        | 21.96       |
| 69    | Pohjois-Pohjanmaa | glargine | 1488  | 51     | 2531  | 20.15 | 15.31       | 26.51       |
| 70    | Pohjois-Pohjanmaa | detemir  | 490   | 10     | 562   | 17.79 | 9.57        | 33.07       |
| 71    | Pohjois-Pohjanmaa | NPH      | 1591  | 78     | 4185  | 18.64 | 14.93       | 23.27       |
| 72    | Pohjois-Pohjanmaa | no DGN   | 1918  | 15     | 1261  | 11.89 | 7.17        | 19.73       |
| 73    | Kainuu            | glargine | 397   | 11     | 646   | 17.02 | 9.43        | 30.74       |
| 74    | Kainuu            | detemir  | 180   | 0      | 203   | NA    | NA          | NA          |
| 75    | Kainuu            | NPH      | 623   | 17     | 1692  | 10.05 | 6.25        | 16.17       |
| 76    | Kainuu            | no DGN   | 643   | 3      | 357   | 8.41  | 2.71        | 26.08       |
| 77    | Lansi-Pohja       | glargine | 358   | 24     | 527   | 45.52 | 30.51       | 67.91       |
| 78    | Lansi-Pohja       | detemir  | 90    | 5      | 89    | 56.07 | 23.34       | 134.72      |
| 79    | Lansi-Pohja       | NPH      | 421   | 49     | 1058  | 46.31 | 35.00       | 61.27       |
| 80    | Lansi-Pohja       | no DGN   | 461   | 14     | 321   | 43.62 | 25.83       | 73.65       |
| 81    | Lappi             | glargine | 416   | 11     | 680   | 16.17 | 8.95        | 29.20       |
| 82    | Lappi             | detemir  | 151   | 2      | 175   | 11.46 | 2.87        | 45.83       |
| 83    | Lappi             | NPH      | 687   | 34     | 1949  | 17.45 | 12.47       | 24.41       |
| 84    | Lappi             | no DGN   | 699   | 7      | 436   | 16.07 | 7.66        | 33.72       |
| 85    | Ahvenanmaa        | glargine | 15    | 0      | 20    | NA    | NA          | NA          |
| 86    | Ahvenanmaa        | detemir  | 6     | 0      | 8     | NA    | NA          | NA          |
| 87    | Ahvenanmaa        | NPH      | 77    | 2      | 192   | 10.43 | 2.61        | 41.70       |
| 88    | Ahvenanmaa        | no DGN   | 66    | 1      | 46    | 21.52 | 3.03        | 152.73      |
| 89    | Total             | glargine | 20088 | 660    | 33958 | 19.44 | 18.01       | 20.98       |
| 90    | Total             | detemir  | 9305  | 135    | 10120 | 13.34 | 11.27       | 15.79       |
| 91    | Total             | NPH      | 30707 | 1937   | 96164 | 20.14 | 19.27       | 21.06       |
| 92    | Total             | no DGN   | 33788 | 474    | 27375 | 17.32 | 15.82       | 18.95       |

Naive T2 cohort. Data 28th December 2011

### C Appendix 3: Crude rate estimates for *recurrence* of hypoglycemic coma events

Table C.21: The number/risk time/incidence rate (95% CI) for recurrence of hypoglycemic coma events for detemir insulin, glargine insulin, and NPH-insulin stratified by gender.

| S.No. | Gender | Insulin  | Npat | Events | Years | Rate   | lower limit | upper limit |
|-------|--------|----------|------|--------|-------|--------|-------------|-------------|
| 1     | Male   | glargine | 712  | 336    | 1116  | 301.03 | 270.51      | 335.00      |
| 2     | Male   | detemir  | 248  | 33     | 258   | 127.85 | 90.89       | 179.83      |
| 3     | Male   | NPH      | 1181 | 866    | 2534  | 341.77 | 319.74      | 365.30      |
| 4     | Male   | no DGN   | 1149 | 179    | 960   | 186.38 | 160.98      | 215.78      |
| 5     | Female | glargine | 509  | 133    | 851   | 156.27 | 131.84      | 185.22      |
| 6     | Female | detemir  | 211  | 49     | 227   | 216.05 | 163.29      | 285.86      |
| 7     | Female | NPH      | 882  | 511    | 2023  | 252.54 | 231.56      | 275.41      |
| 8     | Female | no DGN   | 1005 | 164    | 893   | 183.64 | 157.58      | 214.01      |
| 9     | Total  | glargine | 1221 | 469    | 1967  | 238.40 | 217.77      | 260.99      |
| 10    | Total  | detemir  | 459  | 82     | 485   | 169.10 | 136.19      | 209.96      |
| 11    | Total  | NPH      | 2063 | 1377   | 4557  | 302.15 | 286.60      | 318.54      |
| 12    | Total  | no DGN   | 2154 | 343    | 1853  | 185.06 | 166.48      | 205.72      |

Naive T2 cohort. Data 28th December 2011



Table C.22: The number/risk time/incidence rate (95% CI) for recurrence of hypoglycemic coma events for detemir insulin, glargine insulin, and NPH-insulin stratified by age at start of follow up.

| S.No. | Age group | Insulin  | Npat | Events | Years | Rate    | lower limit | upper limit |
|-------|-----------|----------|------|--------|-------|---------|-------------|-------------|
| 1     | 0-9       | glargine | 0    | 0      | 0     | NA      | NA          | NA          |
| 2     | 0-9       | detemir  | 1    | 0      | 2     | NA      | NA          | NA          |
| 3     | 0-9       | NPH      | 0    | 0      | 0     | NA      | NA          | NA          |
| 4     | 0-9       | no DGN   | 1    | 1      | 2     | 419.35  | 59.07       | 2977.06     |
| 5     | 10-19     | glargine | 7    | 14     | 21    | 681.16  | 403.42      | 1150.13     |
| 6     | 10-19     | detemir  | 2    | 1      | 3     | 349.86  | 49.28       | 2483.66     |
| 7     | 10-19     | NPH      | 5    | 11     | 8     | 1374.06 | 760.95      | 2481.17     |
| 8     | 10-19     | no DGN   | 8    | 4      | 12    | 339.29  | 127.34      | 904.03      |
| 9     | 20-29     | glargine | 11   | 1      | 16    | 62.32   | 8.78        | 442.32      |
| 10    | 20-29     | detemir  | 5    | 6      | 9     | 685.27  | 307.88      | 1525.29     |
| 11    | 20-29     | NPH      | 16   | 21     | 34    | 619.77  | 404.09      | 950.55      |
| 12    | 20-29     | no DGN   | 18   | 12     | 30    | 406.70  | 230.97      | 716.14      |
| 13    | 30-39     | glargine | 49   | 88     | 95    | 922.77  | 748.78      | 1137.19     |
| 14    | 30-39     | detemir  | 25   | 6      | 33    | 181.13  | 81.37       | 403.18      |
| 15    | 30-39     | NPH      | 63   | 87     | 163   | 534.28  | 433.02      | 659.22      |
| 16    | 30-39     | no DGN   | 76   | 22     | 78    | 281.78  | 185.54      | 427.95      |
| 17    | 40-49     | glargine | 145  | 75     | 238   | 315.10  | 251.28      | 395.13      |
| 18    | 40-49     | detemir  | 75   | 15     | 95    | 158.32  | 95.44       | 262.61      |
| 19    | 40-49     | NPH      | 204  | 270    | 519   | 519.97  | 461.51      | 585.84      |
| 20    | 40-49     | no DGN   | 227  | 52     | 229   | 226.63  | 172.70      | 297.41      |
| 21    | 50-59     | glargine | 328  | 118    | 563   | 209.70  | 175.08      | 251.16      |
| 22    | 50-59     | detemir  | 148  | 22     | 167   | 131.75  | 86.75       | 200.09      |
| 23    | 50-59     | NPH      | 502  | 268    | 1246  | 215.09  | 190.82      | 242.45      |
| 24    | 50-59     | no DGN   | 513  | 94     | 401   | 234.30  | 191.42      | 286.79      |
| 25    | 60-69     | glargine | 315  | 88     | 509   | 172.99  | 140.37      | 213.19      |
| 26    | 60-69     | detemir  | 109  | 14     | 108   | 130.01  | 77.00       | 219.51      |
| 27    | 60-69     | NPH      | 571  | 385    | 1325  | 290.51  | 262.90      | 321.03      |
| 28    | 60-69     | no DGN   | 571  | 75     | 508   | 147.66  | 117.75      | 185.16      |
| 29    | 70-79     | glargine | 263  | 56     | 402   | 139.15  | 107.09      | 180.82      |
| 30    | 70-79     | detemir  | 75   | 12     | 58    | 205.29  | 116.59      | 361.49      |
| 31    | 70-79     | NPH      | 491  | 256    | 916   | 279.33  | 247.12      | 315.73      |
| 32    | 70-79     | no DGN   | 498  | 65     | 416   | 156.38  | 122.63      | 199.41      |
| 33    | 80+       | glargine | 103  | 29     | 123   | 234.98  | 163.29      | 338.14      |
| 34    | 80+       | detemir  | 19   | 6      | 11    | 558.49  | 250.93      | 1243.01     |
| 35    | 80+       | NPH      | 211  | 79     | 346   | 228.54  | 183.31      | 284.92      |
| 36    | 80+       | no DGN   | 242  | 18     | 177   | 101.41  | 63.89       | 160.96      |
| 37    | Total     | glargine | 1221 | 469    | 1967  | 238.40  | 217.77      | 260.99      |
| 38    | Total     | detemir  | 459  | 82     | 485   | 169.10  | 136.19      | 209.96      |
| 39    | Total     | NPH      | 2063 | 1377   | 4557  | 302.15  | 286.60      | 318.54      |
| 40    | Total     | no DGN   | 2154 | 343    | 1853  | 185.06  | 166.48      | 205.72      |

Naive T2 cohort. Data 28th December 2011

Table C.23: The number/risk time/incidence rate (95% CI) for recurrence of hypoglycemic coma events for detemir insulin, glargine insulin, and NPH-insulin stratified by calendar year at start of follow-up.

| S.No. | Calender year | Insulin  | Npat | Events | Years | Rate   | lower limit | upper limit |
|-------|---------------|----------|------|--------|-------|--------|-------------|-------------|
| 1     | 00-05         | glargine | 865  | 355    | 1598  | 222.12 | 200.17      | 246.47      |
| 2     | 00-05         | detemir  | 314  | 37     | 366   | 101.18 | 73.31       | 139.65      |
| 3     | 00-05         | NPH      | 1774 | 1220   | 4212  | 289.62 | 273.82      | 306.34      |
| 4     | 00-05         | no DGN   | 1767 | 301    | 1684  | 178.79 | 159.70      | 200.18      |
| 5     | 06            | glargine | 92   | 23     | 118   | 195.05 | 129.61      | 293.52      |
| 6     | 06            | detemir  | 36   | 13     | 34    | 380.80 | 221.11      | 655.82      |
| 7     | 06            | NPH      | 161  | 97     | 233   | 415.52 | 340.54      | 507.01      |
| 8     | 06            | no DGN   | 167  | 26     | 95    | 273.09 | 185.94      | 401.09      |
| 9     | 07            | glargine | 138  | 54     | 164   | 328.80 | 251.82      | 429.31      |
| 10    | 07            | detemir  | 39   | 15     | 41    | 363.36 | 219.06      | 602.73      |
| 11    | 07            | NPH      | 79   | 40     | 84    | 477.87 | 350.53      | 651.47      |
| 12    | 07            | no DGN   | 127  | 14     | 52    | 269.61 | 159.69      | 455.21      |
| 13    | 08            | glargine | 97   | 34     | 78    | 438.10 | 313.04      | 613.14      |
| 14    | 08            | detemir  | 51   | 12     | 38    | 314.83 | 178.79      | 554.36      |
| 15    | 08            | NPH      | 37   | 19     | 25    | 763.70 | 487.14      | 1197.28     |
| 16    | 08            | no DGN   | 78   | 1      | 20    | 48.99  | 6.90        | 347.82      |
| 17    | 09            | glargine | 29   | 3      | 9     | 323.99 | 104.49      | 1004.59     |
| 18    | 09            | detemir  | 19   | 5      | 6     | 877.58 | 365.27      | 2108.45     |
| 19    | 09            | NPH      | 12   | 1      | 3     | 337.88 | 47.59       | 2398.71     |
| 20    | 09            | no DGN   | 15   | 1      | 2     | 412.71 | 58.13       | 2929.98     |
| 21    | Total         | glargine | 1221 | 469    | 1967  | 238.40 | 217.77      | 260.99      |
| 22    | Total         | detemir  | 459  | 82     | 485   | 169.10 | 136.19      | 209.96      |
| 23    | Total         | NPH      | 2063 | 1377   | 4557  | 302.15 | 286.60      | 318.54      |
| 24    | Total         | no DGN   | 2154 | 343    | 1853  | 185.06 | 166.48      | 205.72      |

Naive T2 cohort. Data 28th December 2011

Table C.24: The number/risk time/incidence rate (95% CI) for recurrence of hypoglycemic coma events for detemir insulin, glargine insulin, and NPH-insulin stratified by calendar time since diagnose (first reimbursement decision or purchase).

| S.No. | Time since diag | Insulin  | Npat | Events | Years | Rate   | lower limit | upper limit |
|-------|-----------------|----------|------|--------|-------|--------|-------------|-------------|
| 1     | -1              | glargine | 282  | 107    | 463   | 231.17 | 191.26      | 279.39      |
| 2     | -1              | detemir  | 121  | 26     | 145   | 178.82 | 121.76      | 262.64      |
| 3     | -1              | NPH      | 580  | 465    | 1337  | 347.70 | 317.49      | 380.79      |
| 4     | -1              | no DGN   | 584  | 140    | 661   | 211.70 | 179.38      | 249.83      |
| 5     | 1-2             | glargine | 129  | 61     | 221   | 275.90 | 214.67      | 354.60      |
| 6     | 1-2             | detemir  | 46   | 8      | 41    | 195.61 | 97.82       | 391.15      |
| 7     | 1-2             | NPH      | 212  | 119    | 469   | 253.67 | 211.95      | 303.60      |
| 8     | 1-2             | no DGN   | 221  | 36     | 211   | 170.26 | 122.81      | 236.04      |
| 9     | 2-5             | glargine | 377  | 95     | 617   | 154.04 | 125.98      | 188.35      |
| 10    | 2-5             | detemir  | 130  | 25     | 139   | 180.01 | 121.63      | 266.41      |
| 11    | 2-5             | NPH      | 597  | 302    | 1358  | 222.44 | 198.71      | 249.00      |
| 12    | 2-5             | no DGN   | 616  | 56     | 457   | 122.67 | 94.41       | 159.40      |
| 13    | 5-10            | glargine | 364  | 108    | 567   | 190.50 | 157.75      | 230.03      |
| 14    | 5-10            | detemir  | 133  | 18     | 135   | 133.41 | 84.05       | 211.73      |
| 15    | 5-10            | NPH      | 606  | 405    | 1274  | 317.79 | 288.30      | 350.30      |
| 16    | 5-10            | no DGN   | 647  | 89     | 472   | 188.55 | 153.18      | 232.09      |
| 17    | 10-             | glargine | 69   | 98     | 100   | 983.64 | 806.95      | 1199.00     |
| 18    | 10-             | detemir  | 29   | 5      | 25    | 201.48 | 83.87       | 484.04      |
| 19    | 10-             | NPH      | 68   | 86     | 119   | 723.85 | 585.95      | 894.20      |
| 20    | 10-             | no DGN   | 86   | 22     | 52    | 421.66 | 277.64      | 640.38      |
| 21    | Total           | glargine | 1221 | 469    | 1967  | 238.40 | 217.77      | 260.99      |
| 22    | Total           | detemir  | 459  | 82     | 485   | 169.10 | 136.19      | 209.96      |
| 23    | Total           | NPH      | 2063 | 1377   | 4557  | 302.15 | 286.60      | 318.54      |
| 24    | Total           | no DGN   | 2154 | 343    | 1853  | 185.06 | 166.48      | 205.72      |

Naive T2 cohort. Data 28th December 2011

Table C.25: The number/risk time/incidence rate (95% CI) for recurrence of hypoglycemic coma events for detemir insulin, glargine insulin, and NPH-insulin stratified by history use of oral diabetes medication (A10BB) at start of follow-up.

| S.No. | A10BB hist | Insulin  | Npat | Events | Years | Rate   | lower limit | upper limit |
|-------|------------|----------|------|--------|-------|--------|-------------|-------------|
| 1     | No         | glargine | 272  | 184    | 382   | 481.16 | 416.43      | 555.96      |
| 2     | No         | detemir  | 118  | 31     | 136   | 227.72 | 160.15      | 323.80      |
| 3     | No         | NPH      | 499  | 424    | 1150  | 368.66 | 335.18      | 405.47      |
| 4     | No         | no DGN   | 511  | 126    | 547   | 230.48 | 193.56      | 274.45      |
| 5     | Yes        | glargine | 949  | 285    | 1585  | 179.83 | 160.12      | 201.97      |
| 6     | Yes        | detemir  | 341  | 51     | 349   | 146.22 | 111.13      | 192.40      |
| 7     | Yes        | NPH      | 1564 | 953    | 3407  | 279.70 | 262.49      | 298.03      |
| 8     | Yes        | no DGN   | 1643 | 217    | 1307  | 166.06 | 145.37      | 189.69      |
| 9     | Total      | glargine | 1221 | 469    | 1967  | 238.40 | 217.77      | 260.99      |
| 10    | Total      | detemir  | 459  | 82     | 485   | 169.10 | 136.19      | 209.96      |
| 11    | Total      | NPH      | 2063 | 1377   | 4557  | 302.15 | 286.60      | 318.54      |
| 12    | Total      | no DGN   | 2154 | 343    | 1853  | 185.06 | 166.48      | 205.72      |

Naive T2 cohort. Data 28th December 2011

Table C.26: The number/risk time/incidence rate (95% CI) for recurrence of hypoglycemic coma events for detemir insulin, glargine insulin, and NPH-insulin stratified by hospitalization history at start of follow-up.

| S.No. | Hosp hist | Insulin  | Npat | Events | Years | Rate   | lower limit | upper limit |
|-------|-----------|----------|------|--------|-------|--------|-------------|-------------|
| 1     | No        | glargine | 958  | 268    | 1494  | 179.33 | 159.10      | 202.14      |
| 2     | No        | detemir  | 351  | 66     | 380   | 173.62 | 136.41      | 220.99      |
| 3     | No        | NPH      | 1605 | 980    | 3371  | 290.70 | 273.06      | 309.49      |
| 4     | No        | no DGN   | 1671 | 260    | 1439  | 180.74 | 160.06      | 204.10      |
| 5     | Yes       | glargine | 263  | 201    | 473   | 425.12 | 370.23      | 488.15      |
| 6     | Yes       | detemir  | 108  | 16     | 105   | 152.70 | 93.55       | 249.26      |
| 7     | Yes       | NPH      | 458  | 397    | 1186  | 334.67 | 303.32      | 369.27      |
| 8     | Yes       | no DGN   | 483  | 83     | 415   | 200.02 | 161.30      | 248.03      |
| 9     | Total     | glargine | 1221 | 469    | 1967  | 238.40 | 217.77      | 260.99      |
| 10    | Total     | detemir  | 459  | 82     | 485   | 169.10 | 136.19      | 209.96      |
| 11    | Total     | NPH      | 2063 | 1377   | 4557  | 302.15 | 286.60      | 318.54      |
| 12    | Total     | no DGN   | 2154 | 343    | 1853  | 185.06 | 166.48      | 205.72      |

Naive T2 cohort. Data 28th December 2011

Table C.27: The number/risk time/incidence rate (95% CI) for recurrence of hypoglycemic coma events for detemir insulin, glargine insulin, and NPH-insulin stratified by history use of insulin medication (A10A) at start of follow-up.

| S.No.                                    | A10A hist | Insulin  | Npat | Events | Years | Rate   | lower limit | upper limit |
|------------------------------------------|-----------|----------|------|--------|-------|--------|-------------|-------------|
| 1                                        | No        | glargine | 1144 | 433    | 1850  | 234.00 | 212.96      | 257.11      |
| 2                                        | No        | detemir  | 427  | 73     | 447   | 163.21 | 129.75      | 205.29      |
| 3                                        | No        | NPH      | 1968 | 1261   | 4385  | 287.59 | 272.14      | 303.91      |
| 4                                        | No        | no DGN   | 2022 | 322    | 1736  | 185.49 | 166.30      | 206.90      |
| 5                                        | Yes       | glargine | 77   | 36     | 117   | 308.21 | 222.32      | 427.29      |
| 6                                        | Yes       | detemir  | 32   | 9      | 38    | 239.12 | 124.42      | 459.58      |
| 7                                        | Yes       | NPH      | 95   | 116    | 173   | 672.08 | 560.25      | 806.22      |
| 8                                        | Yes       | no DGN   | 132  | 21     | 118   | 178.71 | 116.52      | 274.09      |
| 9                                        | Total     | glargine | 1221 | 469    | 1967  | 238.40 | 217.77      | 260.99      |
| 10                                       | Total     | detemir  | 459  | 82     | 485   | 169.10 | 136.19      | 209.96      |
| 11                                       | Total     | NPH      | 2063 | 1377   | 4557  | 302.15 | 286.60      | 318.54      |
| 12                                       | Total     | no DGN   | 2154 | 343    | 1853  | 185.06 | 166.48      | 205.72      |
| Naive T2 cohort. Data 28th December 2011 |           |          |      |        |       |        |             |             |

Table C.28: The number/risk time/incidence rate (95% CI) for recurrence of hypoglycemic coma events for detemir insulin, glargine insulin, and NPH-insulin stratified by hospital district at start of follow-up.

| S.No. | Hosp. District    | Insulin  | Npat | Events | Years | Rate    | lower limit | upper limit |
|-------|-------------------|----------|------|--------|-------|---------|-------------|-------------|
| 1     | Unknown           | glargine | 261  | 79     | 532   | 148.45  | 119.07      | 185.07      |
| 2     | Unknown           | detemir  | 111  | 17     | 131   | 129.54  | 80.53       | 208.38      |
| 3     | Unknown           | NPH      | 629  | 427    | 1785  | 239.21  | 217.56      | 263.01      |
| 4     | Unknown           | no DGN   | 639  | 115    | 705   | 163.07  | 135.83      | 195.77      |
| 5     | HUS               | glargine | 314  | 171    | 505   | 338.68  | 291.54      | 393.45      |
| 6     | HUS               | detemir  | 100  | 20     | 101   | 198.59  | 128.12      | 307.81      |
| 7     | HUS               | NPH      | 389  | 224    | 748   | 299.58  | 262.81      | 341.50      |
| 8     | HUS               | no DGN   | 458  | 69     | 363   | 190.34  | 150.33      | 240.99      |
| 9     | Varsinais-Suomi   | glargine | 80   | 46     | 131   | 350.26  | 262.36      | 467.63      |
| 10    | Varsinais-Suomi   | detemir  | 27   | 10     | 29    | 349.66  | 188.13      | 649.85      |
| 11    | Varsinais-Suomi   | NPH      | 99   | 104    | 199   | 522.60  | 431.22      | 633.33      |
| 12    | Varsinais-Suomi   | no DGN   | 101  | 32     | 89    | 358.35  | 253.42      | 506.73      |
| 13    | Satakunta         | glargine | 16   | 7      | 21    | 341.26  | 162.69      | 715.85      |
| 14    | Satakunta         | detemir  | 19   | 9      | 19    | 478.77  | 249.13      | 920.09      |
| 15    | Satakunta         | NPH      | 61   | 38     | 104   | 364.76  | 265.41      | 501.29      |
| 16    | Satakunta         | no DGN   | 54   | 7      | 40    | 173.22  | 82.58       | 363.36      |
| 17    | Kantahame         | glargine | 45   | 22     | 64    | 345.03  | 227.19      | 524.01      |
| 18    | Kantahame         | detemir  | 8    | 2      | 6     | 353.92  | 88.51       | 1415.17     |
| 19    | Kantahame         | NPH      | 75   | 65     | 150   | 433.64  | 340.06      | 552.97      |
| 20    | Kantahame         | no DGN   | 75   | 12     | 68    | 176.66  | 100.32      | 311.06      |
| 21    | Pirkanmaa         | glargine | 34   | 17     | 29    | 582.04  | 361.83      | 936.28      |
| 22    | Pirkanmaa         | detemir  | 12   | 0      | 11    | NA      | NA          | NA          |
| 23    | Pirkanmaa         | NPH      | 37   | 8      | 49    | 164.94  | 82.49       | 329.83      |
| 24    | Pirkanmaa         | no DGN   | 44   | 2      | 29    | 68.67   | 17.17       | 274.57      |
| 25    | Paijat-Hame       | glargine | 37   | 11     | 67    | 165.08  | 91.42       | 298.09      |
| 26    | Paijat-Hame       | detemir  | 17   | 2      | 19    | 104.85  | 26.22       | 419.24      |
| 27    | Paijat-Hame       | NPH      | 124  | 186    | 314   | 592.14  | 512.88      | 683.66      |
| 28    | Paijat-Hame       | no DGN   | 109  | 22     | 74    | 297.32  | 195.77      | 451.55      |
| 29    | Kymenlaakso       | glargine | 41   | 3      | 65    | 45.81   | 14.77       | 142.04      |
| 30    | Kymenlaakso       | detemir  | 14   | 0      | 19    | NA      | NA          | NA          |
| 31    | Kymenlaakso       | NPH      | 67   | 21     | 155   | 135.24  | 88.18       | 207.42      |
| 32    | Kymenlaakso       | no DGN   | 77   | 9      | 33    | 269.03  | 139.98      | 517.04      |
| 33    | Etela-Karjala     | glargine | 29   | 5      | 48    | 103.54  | 43.10       | 248.75      |
| 34    | Etela-Karjala     | detemir  | 10   | 0      | 10    | NA      | NA          | NA          |
| 35    | Etela-Karjala     | NPH      | 38   | 6      | 69    | 86.41   | 38.82       | 192.35      |
| 36    | Etela-Karjala     | no DGN   | 47   | 3      | 35    | 85.39   | 27.54       | 264.75      |
| 37    | Etela-Savo        | glargine | 13   | 0      | 22    | NA      | NA          | NA          |
| 38    | Etela-Savo        | detemir  | 7    | 0      | 7     | NA      | NA          | NA          |
| 39    | Etela-Savo        | NPH      | 33   | 9      | 70    | 128.46  | 66.84       | 246.89      |
| 40    | Etela-Savo        | no DGN   | 32   | 8      | 21    | 381.11  | 190.59      | 762.08      |
| 41    | Ita-Savo          | glargine | 6    | 8      | 11    | 754.84  | 377.49      | 1509.41     |
| 42    | Ita-Savo          | detemir  | 2    | 0      | 1     | NA      | NA          | NA          |
| 43    | Ita-Savo          | NPH      | 12   | 4      | 16    | 247.12  | 92.77       | 658.33      |
| 44    | Ita-Savo          | no DGN   | 15   | 5      | 26    | 193.52  | 80.55       | 464.95      |
| 45    | Pohjois-Karjala   | glargine | 8    | 2      | 5     | 423.48  | 105.91      | 1693.29     |
| 46    | Pohjois-Karjala   | detemir  | 1    | 0      | 0     | NA      | NA          | NA          |
| 47    | Pohjois-Karjala   | NPH      | 13   | 19     | 15    | 1235.49 | 788.06      | 1936.96     |
| 48    | Pohjois-Karjala   | no DGN   | 8    | 0      | 6     | NA      | NA          | NA          |
| 49    | Pohjois-Savo      | glargine | 73   | 13     | 108   | 120.54  | 69.99       | 207.59      |
| 50    | Pohjois-Savo      | detemir  | 19   | 4      | 14    | 296.17  | 111.16      | 789.13      |
| 51    | Pohjois-Savo      | NPH      | 74   | 15     | 122   | 122.50  | 73.85       | 203.20      |
| 52    | Pohjois-Savo      | no DGN   | 75   | 6      | 56    | 108.08  | 48.55       | 240.57      |
| 53    | Keski-Suomi       | glargine | 46   | 17     | 69    | 247.83  | 154.07      | 398.67      |
| 54    | Keski-Suomi       | detemir  | 20   | 8      | 26    | 311.68  | 155.88      | 623.22      |
| 55    | Keski-Suomi       | NPH      | 69   | 57     | 145   | 392.58  | 302.82      | 508.95      |
| 56    | Keski-Suomi       | no DGN   | 75   | 11     | 57    | 192.56  | 106.64      | 347.71      |
| 57    | Etela-Pohjanmaa   | glargine | 57   | 17     | 88    | 193.31  | 120.17      | 310.96      |
| 58    | Etela-Pohjanmaa   | detemir  | 32   | 1      | 35    | 28.40   | 4.00        | 201.63      |
| 59    | Etela-Pohjanmaa   | NPH      | 110  | 57     | 220   | 258.60  | 199.47      | 335.25      |
| 60    | Etela-Pohjanmaa   | no DGN   | 101  | 10     | 59    | 168.91  | 90.88       | 313.93      |
| 61    | Vaasa             | glargine | 15   | 18     | 18    | 984.35  | 620.18      | 1562.37     |
| 62    | Vaasa             | detemir  | 17   | 1      | 14    | 69.05   | 9.73        | 490.18      |
| 63    | Vaasa             | NPH      | 35   | 21     | 76    | 277.54  | 180.96      | 425.66      |
| 64    | Vaasa             | no DGN   | 35   | 7      | 24    | 294.49  | 140.39      | 617.73      |
| 65    | Keski-Pohjanmaa   | glargine | 3    | 4      | 2     | 1737.22 | 652.06      | 4628.33     |
| 66    | Keski-Pohjanmaa   | detemir  | 3    | 2      | 2     | 908.58  | 227.25      | 3632.61     |
| 67    | Keski-Pohjanmaa   | NPH      | 6    | 0      | 5     | NA      | NA          | NA          |
| 68    | Keski-Pohjanmaa   | no DGN   | 5    | 0      | 1     | NA      | NA          | NA          |
| 69    | Pohjois-Pohjanmaa | glargine | 69   | 10     | 99    | 101.08  | 54.39       | 187.85      |
| 70    | Pohjois-Pohjanmaa | detemir  | 20   | 2      | 22    | 89.37   | 22.35       | 357.28      |
| 71    | Pohjois-Pohjanmaa | NPH      | 81   | 76     | 141   | 538.55  | 430.12      | 674.32      |
| 72    | Pohjois-Pohjanmaa | no DGN   | 104  | 14     | 82    | 171.77  | 101.73      | 290.04      |
| 73    | Kainuu            | glargine | 12   | 3      | 14    | 221.95  | 71.58       | 688.17      |
| 74    | Kainuu            | detemir  | 4    | 0      | 6     | NA      | NA          | NA          |
| 75    | Kainuu            | NPH      | 20   | 7      | 30    | 229.63  | 109.47      | 481.69      |
| 76    | Kainuu            | no DGN   | 17   | 1      | 10    | 95.64   | 13.47       | 678.92      |
| 77    | Lansi-Pohja       | glargine | 40   | 12     | 47    | 256.71  | 145.79      | 452.00      |
| 78    | Lansi-Pohja       | detemir  | 11   | 1      | 9     | 109.55  | 15.43       | 777.74      |
| 79    | Lansi-Pohja       | NPH      | 51   | 27     | 80    | 336.33  | 230.64      | 490.43      |
| 80    | Lansi-Pohja       | no DGN   | 50   | 8      | 46    | 175.51  | 87.77       | 350.95      |
| 81    | Lappi             | glargine | 22   | 4      | 24    | 169.43  | 63.59       | 451.44      |
| 82    | Lappi             | detemir  | 5    | 3      | 5     | 552.85  | 178.32      | 1714.00     |
| 83    | Lappi             | NPH      | 38   | 6      | 61    | 98.18   | 44.11       | 218.53      |
| 84    | Lappi             | no DGN   | 31   | 2      | 29    | 69.67   | 17.42       | 278.57      |
| 85    | Ahvenanmaa        | glargine | 0    | 0      | 0     | NA      | NA          | NA          |
| 86    | Ahvenanmaa        | detemir  | 0    | 0      | 0     | NA      | NA          | NA          |
| 87    | Ahvenanmaa        | NPH      | 2    | 0      | 1     | NA      | NA          | NA          |
| 88    | Ahvenanmaa        | no DGN   | 2    | 0      | 0     | NA      | NA          | NA          |
| 89    | Total             | glargine | 1221 | 469    | 1967  | 238.40  | 217.77      | 260.99      |
| 90    | Total             | detemir  | 459  | 82     | 485   | 169.10  | 136.19      | 209.96      |
| 91    | Total             | NPH      | 2063 | 1377   | 4557  | 302.15  | 286.60      | 318.54      |
| 92    | Total             | no DGN   | 2154 | 343    | 1853  | 185.06  | 166.48      | 205.72      |

Naive T2 cohort. Data 28th December 2011

## D Appendix 4: Crude rate estimates for *all* severe hypoglycemic coma events

Table D.29: The number/risk time/incidence rate (95% CI) of all hypoglycemic coma events for detemir insulin, glargine insulin, and NPH-insulin stratified by gender.

| S.No. | Gender | Insulin  | Npat  | Events | Years  | Rate  | lower limit | upper limit |
|-------|--------|----------|-------|--------|--------|-------|-------------|-------------|
| 1     | Male   | glargine | 11955 | 722    | 20943  | 34.47 | 32.05       | 37.08       |
| 2     | Male   | detemir  | 5504  | 108    | 6044   | 17.87 | 14.80       | 21.58       |
| 3     | Male   | NPH      | 17121 | 1978   | 56240  | 35.17 | 33.65       | 36.76       |
| 4     | Male   | no DGN   | 19413 | 420    | 15189  | 27.65 | 25.13       | 30.43       |
| 5     | Female | glargine | 8687  | 407    | 15008  | 27.12 | 24.61       | 29.89       |
| 6     | Female | detemir  | 4126  | 109    | 4565   | 23.88 | 19.79       | 28.81       |
| 7     | Female | NPH      | 13601 | 1336   | 44556  | 29.98 | 28.42       | 31.64       |
| 8     | Female | no DGN   | 15142 | 397    | 14096  | 28.16 | 25.53       | 31.08       |
| 9     | Total  | glargine | 20642 | 1129   | 35951  | 31.40 | 29.62       | 33.29       |
| 10    | Total  | detemir  | 9630  | 217    | 10609  | 20.45 | 17.91       | 23.36       |
| 11    | Total  | NPH      | 30722 | 3314   | 100796 | 32.88 | 31.78       | 34.02       |
| 12    | Total  | no DGN   | 34555 | 817    | 29285  | 27.90 | 26.05       | 29.88       |

Naive T2 cohort. Data 28th December 2011



Table D.30: The number/risk time/incidence rate (95% CI) of all hypoglycemic coma events for detemir insulin, glargine insulin, and NPH-insulin stratified by age at start of follow up.

| S.No. | Age group | Insulin  | Npat  | Events | Years  | Rate   | lower limit | upper limit |
|-------|-----------|----------|-------|--------|--------|--------|-------------|-------------|
| 1     | 0-9       | glargine | 23    | 0      | 49     | NA     | NA          | NA          |
| 2     | 0-9       | detemir  | 28    | 0      | 47     | NA     | NA          | NA          |
| 3     | 0-9       | NPH      | 37    | 1      | 106    | 9.44   | 1.33        | 67.01       |
| 4     | 0-9       | no DGN   | 39    | 1      | 29     | 34.69  | 4.89        | 246.29      |
| 5     | 10-19     | glargine | 54    | 18     | 161    | 111.59 | 70.30       | 177.11      |
| 6     | 10-19     | detemir  | 37    | 1      | 56     | 17.93  | 2.53        | 127.31      |
| 7     | 10-19     | NPH      | 54    | 15     | 144    | 104.45 | 62.97       | 173.25      |
| 8     | 10-19     | no DGN   | 79    | 7      | 106    | 65.93  | 31.43       | 138.30      |
| 9     | 20-29     | glargine | 152   | 5      | 287    | 17.40  | 7.24        | 41.79       |
| 10    | 20-29     | detemir  | 90    | 6      | 124    | 48.40  | 21.75       | 107.74      |
| 11    | 20-29     | NPH      | 239   | 32     | 565    | 56.62  | 40.04       | 80.07       |
| 12    | 20-29     | no DGN   | 286   | 21     | 609    | 34.48  | 22.48       | 52.88       |
| 13    | 30-39     | glargine | 646   | 110    | 1242   | 88.55  | 73.46       | 106.75      |
| 14    | 30-39     | detemir  | 377   | 10     | 476    | 21.00  | 11.30       | 39.03       |
| 15    | 30-39     | NPH      | 1065  | 143    | 3130   | 45.69  | 38.78       | 53.83       |
| 16    | 30-39     | no DGN   | 1257  | 32     | 2197   | 14.56  | 10.30       | 20.59       |
| 17    | 40-49     | glargine | 2183  | 150    | 4180   | 35.88  | 30.58       | 42.11       |
| 18    | 40-49     | detemir  | 1226  | 33     | 1523   | 21.67  | 15.40       | 30.47       |
| 19    | 40-49     | NPH      | 2970  | 453    | 10200  | 44.41  | 40.50       | 48.69       |
| 20    | 40-49     | no DGN   | 3609  | 103    | 3465   | 29.72  | 24.50       | 36.05       |
| 21    | 50-59     | glargine | 5543  | 279    | 10634  | 26.24  | 23.33       | 29.50       |
| 22    | 50-59     | detemir  | 2820  | 60     | 3314   | 18.11  | 14.06       | 23.32       |
| 23    | 50-59     | NPH      | 7990  | 726    | 29455  | 24.65  | 22.92       | 26.51       |
| 24    | 50-59     | no DGN   | 9146  | 210    | 7405   | 28.36  | 24.77       | 32.46       |
| 25    | 60-69     | glargine | 5543  | 261    | 9668   | 27.00  | 23.91       | 30.48       |
| 26    | 60-69     | detemir  | 2710  | 47     | 2908   | 16.16  | 12.14       | 21.51       |
| 27    | 60-69     | NPH      | 8254  | 934    | 29120  | 32.07  | 30.08       | 34.20       |
| 28    | 60-69     | no DGN   | 9163  | 194    | 6700   | 28.95  | 25.15       | 33.33       |
| 29    | 70-79     | glargine | 4187  | 201    | 6703   | 29.99  | 26.11       | 34.43       |
| 30    | 70-79     | detemir  | 1636  | 43     | 1584   | 27.14  | 20.13       | 36.60       |
| 31    | 70-79     | NPH      | 6692  | 731    | 20787  | 35.17  | 32.71       | 37.81       |
| 32    | 70-79     | no DGN   | 7215  | 171    | 5898   | 28.99  | 24.96       | 33.68       |
| 33    | 80+       | glargine | 2311  | 105    | 3025   | 34.71  | 28.67       | 42.02       |
| 34    | 80+       | detemir  | 706   | 17     | 577    | 29.45  | 18.31       | 47.37       |
| 35    | 80+       | NPH      | 3421  | 279    | 7289   | 38.28  | 34.04       | 43.04       |
| 36    | 80+       | no DGN   | 3761  | 78     | 2875   | 27.13  | 21.73       | 33.87       |
| 37    | Total     | glargine | 20642 | 1129   | 35951  | 31.40  | 29.62       | 33.29       |
| 38    | Total     | detemir  | 9630  | 217    | 10609  | 20.45  | 17.91       | 23.36       |
| 39    | Total     | NPH      | 30722 | 3314   | 100796 | 32.88  | 31.78       | 34.02       |
| 40    | Total     | no DGN   | 34555 | 817    | 29285  | 27.90  | 26.05       | 29.88       |

Naive T2 cohort. Data 28th December 2011

Table D.31: The number/risk time/incidence rate (95% CI) of all hypoglycemic coma events for detemir insulin, glargine insulin, and NPH-insulin stratified by calendar year at start of follow-up.

| S.No. | Time since diag | Insulin  | Npat  | Events | Years  | Rate  | lower limit | upper limit |
|-------|-----------------|----------|-------|--------|--------|-------|-------------|-------------|
| 1     | 00-05           | glargine | 7756  | 716    | 19452  | 36.81 | 34.21       | 39.61       |
| 2     | 00-05           | detemir  | 3155  | 72     | 4143   | 17.38 | 13.80       | 21.90       |
| 3     | 00-05           | NPH      | 21752 | 2874   | 86259  | 33.32 | 32.12       | 34.56       |
| 4     | 00-05           | no DGN   | 21163 | 698    | 24593  | 28.38 | 26.35       | 30.57       |
| 5     | 06              | glargine | 1441  | 75     | 2749   | 27.28 | 21.76       | 34.21       |
| 6     | 06              | detemir  | 699   | 24     | 914    | 26.25 | 17.59       | 39.16       |
| 7     | 06              | NPH      | 3796  | 251    | 8138   | 30.84 | 27.25       | 34.90       |
| 8     | 06              | no DGN   | 3438  | 62     | 2103   | 29.48 | 22.98       | 37.81       |
| 9     | 07              | glargine | 3319  | 174    | 6397   | 27.20 | 23.44       | 31.56       |
| 10    | 07              | detemir  | 1257  | 42     | 1997   | 21.04 | 15.55       | 28.46       |
| 11    | 07              | NPH      | 2670  | 117    | 4357   | 26.86 | 22.40       | 32.19       |
| 12    | 07              | no DGN   | 4310  | 46     | 1553   | 29.61 | 22.18       | 39.53       |
| 13    | 08              | glargine | 4158  | 131    | 5416   | 24.19 | 20.38       | 28.70       |
| 14    | 08              | detemir  | 2057  | 57     | 2489   | 22.90 | 17.66       | 29.68       |
| 15    | 08              | NPH      | 1525  | 56     | 1639   | 34.17 | 26.29       | 44.40       |
| 16    | 08              | no DGN   | 3813  | 8      | 799    | 10.01 | 5.01        | 20.01       |
| 17    | 09              | glargine | 3968  | 33     | 1937   | 17.04 | 12.11       | 23.97       |
| 18    | 09              | detemir  | 2462  | 22     | 1067   | 20.63 | 13.58       | 31.33       |
| 19    | 09              | NPH      | 979   | 16     | 403    | 39.72 | 24.33       | 64.83       |
| 20    | 09              | no DGN   | 1831  | 3      | 236    | 12.73 | 4.10        | 39.46       |
| 21    | Total           | glargine | 20642 | 1129   | 35951  | 31.40 | 29.62       | 33.29       |
| 22    | Total           | detemir  | 9630  | 217    | 10609  | 20.45 | 17.91       | 23.36       |
| 23    | Total           | NPH      | 30722 | 3314   | 100796 | 32.88 | 31.78       | 34.02       |
| 24    | Total           | no DGN   | 34555 | 817    | 29285  | 27.90 | 26.05       | 29.88       |

Naive T2 cohort. Data 28th December 2011

Table D.32: The number/risk time/incidence rate (95% CI) of all hypoglycemic coma events for detemir insulin, glargine insulin, and NPH-insulin stratified by calendar time since diagnose (first reimbursement decision or purchase).

| S.No. | Calender year | Insulin  | Npat  | Events | Years  | Rate  | lower limit | upper limit |
|-------|---------------|----------|-------|--------|--------|-------|-------------|-------------|
| 1     | -1            | glargine | 4809  | 254    | 8004   | 31.73 | 28.06       | 35.89       |
| 2     | -1            | detemir  | 2439  | 49     | 2720   | 18.01 | 13.61       | 23.83       |
| 3     | -1            | NPH      | 8609  | 1015   | 26475  | 38.34 | 36.05       | 40.77       |
| 4     | -1            | no DGN   | 9284  | 272    | 11822  | 23.01 | 20.43       | 25.91       |
| 5     | 1-2           | glargine | 1623  | 112    | 2981   | 37.57 | 31.22       | 45.21       |
| 6     | 1-2           | detemir  | 785   | 17     | 957    | 17.77 | 11.05       | 28.58       |
| 7     | 1-2           | NPH      | 2613  | 312    | 9168   | 34.03 | 30.46       | 38.03       |
| 8     | 1-2           | no DGN   | 2855  | 80     | 2426   | 32.97 | 26.48       | 41.05       |
| 9     | 2-5           | glargine | 5382  | 292    | 10256  | 28.47 | 25.39       | 31.93       |
| 10    | 2-5           | detemir  | 2564  | 60     | 2880   | 20.83 | 16.18       | 26.83       |
| 11    | 2-5           | NPH      | 8852  | 858    | 32566  | 26.35 | 24.64       | 28.17       |
| 12    | 2-5           | no DGN   | 9819  | 188    | 7290   | 25.79 | 22.35       | 29.75       |
| 13    | 5-10          | glargine | 6827  | 322    | 12025  | 26.78 | 24.01       | 29.87       |
| 14    | 5-10          | detemir  | 3043  | 60     | 3288   | 18.25 | 14.17       | 23.50       |
| 15    | 5-10          | NPH      | 9209  | 974    | 29759  | 32.73 | 30.74       | 34.85       |
| 16    | 5-10          | no DGN   | 10631 | 241    | 6914   | 34.86 | 30.72       | 39.55       |
| 17    | 10-           | glargine | 2001  | 149    | 2685   | 55.49 | 47.26       | 65.15       |
| 18    | 10-           | detemir  | 799   | 31     | 764    | 40.55 | 28.52       | 57.66       |
| 19    | 10-           | NPH      | 1439  | 155    | 2828   | 54.81 | 46.83       | 64.15       |
| 20    | 10-           | no DGN   | 1966  | 36     | 832    | 43.26 | 31.21       | 59.98       |
| 21    | Total         | glargine | 20642 | 1129   | 35951  | 31.40 | 29.62       | 33.29       |
| 22    | Total         | detemir  | 9630  | 217    | 10609  | 20.45 | 17.91       | 23.36       |
| 23    | Total         | NPH      | 30722 | 3314   | 100796 | 32.88 | 31.78       | 34.02       |
| 24    | Total         | no DGN   | 34555 | 817    | 29285  | 27.90 | 26.05       | 29.88       |

Naive T2 cohort. Data 28th December 2011

Table D.33: The number/risk time/incidence rate (95% CI) of all hypoglycemic coma events for detemir insulin, glargine insulin, and NPH-insulin stratified by history use of oral diabetes medication (A10BB) at start of follow-up.

| S.No. | A10BB hist | Insulin  | Npat  | Events | Years  | Rate  | lower limit | upper limit |
|-------|------------|----------|-------|--------|--------|-------|-------------|-------------|
| 1     | No         | glargine | 5514  | 345    | 8276   | 41.69 | 37.51       | 46.32       |
| 2     | No         | detemir  | 2989  | 64     | 3098   | 20.66 | 16.17       | 26.39       |
| 3     | No         | NPH      | 8435  | 894    | 24704  | 36.19 | 33.89       | 38.64       |
| 4     | No         | no DGN   | 9480  | 254    | 10936  | 23.23 | 20.54       | 26.26       |
| 5     | Yes        | glargine | 15128 | 784    | 27674  | 28.33 | 26.41       | 30.38       |
| 6     | Yes        | detemir  | 6641  | 153    | 7511   | 20.37 | 17.39       | 23.87       |
| 7     | Yes        | NPH      | 22287 | 2420   | 76091  | 31.80 | 30.56       | 33.10       |
| 8     | Yes        | no DGN   | 25075 | 563    | 18349  | 30.68 | 28.25       | 33.33       |
| 9     | Total      | glargine | 20642 | 1129   | 35951  | 31.40 | 29.62       | 33.29       |
| 10    | Total      | detemir  | 9630  | 217    | 10609  | 20.45 | 17.91       | 23.36       |
| 11    | Total      | NPH      | 30722 | 3314   | 100796 | 32.88 | 31.78       | 34.02       |
| 12    | Total      | no DGN   | 34555 | 817    | 29285  | 27.90 | 26.05       | 29.88       |

Naive T2 cohort. Data 28th December 2011

Table D.34: The number/risk time/incidence rate (95% CI) of all hypoglycemic coma events for detemir insulin, glargine insulin, and NPH-insulin stratified by hospitalization history at start of follow-up.

| S.No. | Hosp hist | Insulin  | Npat  | Events | Years  | Rate   | lower limit | upper limit |
|-------|-----------|----------|-------|--------|--------|--------|-------------|-------------|
| 1     | No        | glargine | 19079 | 783    | 33335  | 23.49  | 21.90       | 25.19       |
| 2     | No        | detemir  | 9024  | 172    | 10028  | 17.15  | 14.77       | 19.92       |
| 3     | No        | NPH      | 28643 | 2474   | 95097  | 26.02  | 25.01       | 27.06       |
| 4     | No        | no DGN   | 32220 | 679    | 27419  | 24.76  | 22.97       | 26.70       |
| 5     | Yes       | glargine | 1563  | 346    | 2616   | 132.27 | 119.04      | 146.97      |
| 6     | Yes       | detemir  | 606   | 45     | 581    | 77.43  | 57.81       | 103.70      |
| 7     | Yes       | NPH      | 2079  | 840    | 5699   | 147.40 | 137.77      | 157.72      |
| 8     | Yes       | no DGN   | 2335  | 138    | 1866   | 73.95  | 62.59       | 87.38       |
| 9     | Total     | glargine | 20642 | 1129   | 35951  | 31.40  | 29.62       | 33.29       |
| 10    | Total     | detemir  | 9630  | 217    | 10609  | 20.45  | 17.91       | 23.36       |
| 11    | Total     | NPH      | 30722 | 3314   | 100796 | 32.88  | 31.78       | 34.02       |
| 12    | Total     | no DGN   | 34555 | 817    | 29285  | 27.90  | 26.05       | 29.88       |

Naive T2 cohort. Data 28th December 2011

Table D.35: The number/risk time/incidence rate (95% CI) of all hypoglycemic coma events for detemir insulin, glargine insulin, and NPH-insulin stratified by history use of insulin medication (A10A) at start of follow-up.

| S.No. | A10A hist | Insulin  | Npat  | Events | Years  | Rate  | lower limit | upper limit |
|-------|-----------|----------|-------|--------|--------|-------|-------------|-------------|
| 1     | No        | glargine | 19616 | 1041   | 34132  | 30.50 | 28.70       | 32.41       |
| 2     | No        | detemir  | 9060  | 197    | 9919   | 19.86 | 17.27       | 22.84       |
| 3     | No        | NPH      | 29485 | 3113   | 97771  | 31.84 | 30.74       | 32.98       |
| 4     | No        | no DGN   | 33070 | 771    | 27756  | 27.78 | 25.88       | 29.81       |
| 5     | Yes       | glargine | 1026  | 88     | 1819   | 48.38 | 39.26       | 59.62       |
| 6     | Yes       | detemir  | 570   | 20     | 691    | 28.96 | 18.68       | 44.89       |
| 7     | Yes       | NPH      | 1237  | 201    | 3025   | 66.45 | 57.87       | 76.30       |
| 8     | Yes       | no DGN   | 1485  | 46     | 1529   | 30.09 | 22.54       | 40.17       |
| 9     | Total     | glargine | 20642 | 1129   | 35951  | 31.40 | 29.62       | 33.29       |
| 10    | Total     | detemir  | 9630  | 217    | 10609  | 20.45 | 17.91       | 23.36       |
| 11    | Total     | NPH      | 30722 | 3314   | 100796 | 32.88 | 31.78       | 34.02       |
| 12    | Total     | no DGN   | 34555 | 817    | 29285  | 27.90 | 26.05       | 29.88       |

Naive T2 cohort. Data 28th December 2011

Table D.36: The number/risk time/incidence rate (95% CI) of all hypoglycemic coma events for detemir insulin, glargine insulin, and NPH-insulin stratified by hospital district at start of follow-up.

| S.No. | Hosp. District    | Insulin  | Npat  | Events | Years  | Rate  | lower limit | upper limit |
|-------|-------------------|----------|-------|--------|--------|-------|-------------|-------------|
| 1     | Unknown           | glargine | 1743  | 152    | 4181   | 36.36 | 31.01       | 42.62       |
| 2     | Unknown           | detemir  | 796   | 27     | 1098   | 24.59 | 16.86       | 35.86       |
| 3     | Unknown           | NPH      | 6289  | 1005   | 31631  | 31.77 | 29.87       | 33.80       |
| 4     | Unknown           | no DGN   | 5896  | 270    | 9384   | 28.77 | 25.54       | 32.42       |
| 5     | HUS               | glargine | 4568  | 358    | 7947   | 45.05 | 40.62       | 49.97       |
| 6     | HUS               | detemir  | 1962  | 54     | 2213   | 24.40 | 18.69       | 31.86       |
| 7     | HUS               | NPH      | 5538  | 601    | 15344  | 39.17 | 36.16       | 42.43       |
| 8     | HUS               | no DGN   | 6811  | 163    | 4856   | 33.56 | 28.79       | 39.13       |
| 9     | Varsinais-Suomi   | glargine | 1626  | 90     | 2954   | 30.46 | 24.78       | 37.46       |
| 10    | Varsinais-Suomi   | detemir  | 619   | 21     | 679    | 30.91 | 20.16       | 47.41       |
| 11    | Varsinais-Suomi   | NPH      | 1499  | 198    | 4355   | 45.46 | 39.55       | 52.26       |
| 12    | Varsinais-Suomi   | no DGN   | 2003  | 52     | 1260   | 41.28 | 31.46       | 54.17       |
| 13    | Satakunta         | glargine | 675   | 18     | 1047   | 17.19 | 10.83       | 27.28       |
| 14    | Satakunta         | detemir  | 568   | 15     | 603    | 24.86 | 14.99       | 41.23       |
| 15    | Satakunta         | NPH      | 1170  | 98     | 2988   | 32.80 | 26.91       | 39.98       |
| 16    | Satakunta         | no DGN   | 1291  | 17     | 1019   | 16.68 | 10.37       | 26.83       |
| 17    | Kantahame         | glargine | 757   | 50     | 1351   | 37.01 | 28.05       | 48.84       |
| 18    | Kantahame         | detemir  | 219   | 3      | 223    | 13.44 | 4.33        | 41.66       |
| 19    | Kantahame         | NPH      | 832   | 141    | 2481   | 56.84 | 48.19       | 67.04       |
| 20    | Kantahame         | no DGN   | 1024  | 31     | 677    | 45.78 | 32.19       | 65.09       |
| 21    | Pirkanmaa         | glargine | 1790  | 40     | 2809   | 14.24 | 10.45       | 19.41       |
| 22    | Pirkanmaa         | detemir  | 736   | 7      | 825    | 8.49  | 4.05        | 17.81       |
| 23    | Pirkanmaa         | NPH      | 2329  | 42     | 6765   | 6.21  | 4.59        | 8.40        |
| 24    | Pirkanmaa         | no DGN   | 2659  | 12     | 1808   | 6.64  | 3.77        | 11.69       |
| 25    | Paijat-Hame       | glargine | 708   | 32     | 1201   | 26.64 | 18.84       | 37.67       |
| 26    | Paijat-Hame       | detemir  | 346   | 7      | 375    | 18.66 | 8.89        | 39.14       |
| 27    | Paijat-Hame       | NPH      | 1147  | 301    | 3391   | 88.78 | 79.29       | 99.39       |
| 28    | Paijat-Hame       | no DGN   | 1199  | 40     | 781    | 51.24 | 37.58       | 69.85       |
| 29    | Kymenlaakso       | glargine | 708   | 25     | 1147   | 21.79 | 14.72       | 32.24       |
| 30    | Kymenlaakso       | detemir  | 321   | 4      | 325    | 12.30 | 4.61        | 32.76       |
| 31    | Kymenlaakso       | NPH      | 1004  | 83     | 2998   | 27.69 | 22.33       | 34.33       |
| 32    | Kymenlaakso       | no DGN   | 1158  | 29     | 746    | 38.90 | 27.03       | 55.98       |
| 33    | Etela-Karjala     | glargine | 559   | 26     | 989    | 26.29 | 17.90       | 38.62       |
| 34    | Etela-Karjala     | detemir  | 197   | 5      | 213    | 23.43 | 9.75        | 56.27       |
| 35    | Etela-Karjala     | NPH      | 641   | 39     | 1843   | 21.16 | 15.46       | 28.96       |
| 36    | Etela-Karjala     | no DGN   | 747   | 13     | 513    | 25.33 | 14.71       | 43.63       |
| 37    | Etela-Savo        | glargine | 342   | 7      | 503    | 13.91 | 6.63        | 29.17       |
| 38    | Etela-Savo        | detemir  | 202   | 2      | 215    | 9.31  | 2.33        | 37.24       |
| 39    | Etela-Savo        | NPH      | 646   | 41     | 1829   | 22.42 | 16.51       | 30.45       |
| 40    | Etela-Savo        | no DGN   | 684   | 14     | 482    | 29.05 | 17.21       | 49.06       |
| 41    | Ita-Savo          | glargine | 292   | 11     | 430    | 25.57 | 14.16       | 46.17       |
| 42    | Ita-Savo          | detemir  | 120   | 0      | 98     | NA    | NA          | NA          |
| 43    | Ita-Savo          | NPH      | 440   | 15     | 1253   | 11.97 | 7.22        | 19.85       |
| 44    | Ita-Savo          | no DGN   | 476   | 10     | 393    | 25.47 | 13.70       | 47.33       |
| 45    | Pohjois-Karjala   | glargine | 617   | 7      | 911    | 7.68  | 3.66        | 16.12       |
| 46    | Pohjois-Karjala   | detemir  | 405   | 1      | 366    | 2.73  | 0.38        | 19.37       |
| 47    | Pohjois-Karjala   | NPH      | 1157  | 34     | 3470   | 9.80  | 7.00        | 13.71       |
| 48    | Pohjois-Karjala   | no DGN   | 1169  | 0      | 843    | NA    | NA          | NA          |
| 49    | Pohjois-Savo      | glargine | 1191  | 58     | 2160   | 26.85 | 20.76       | 34.73       |
| 50    | Pohjois-Savo      | detemir  | 438   | 11     | 494    | 22.26 | 12.33       | 40.19       |
| 51    | Pohjois-Savo      | NPH      | 1154  | 83     | 3093   | 26.83 | 21.64       | 33.27       |
| 52    | Pohjois-Savo      | no DGN   | 1531  | 26     | 1059   | 24.56 | 16.72       | 36.07       |
| 53    | Keski-Suomi       | glargine | 870   | 46     | 1485   | 30.98 | 23.21       | 41.36       |
| 54    | Keski-Suomi       | detemir  | 528   | 14     | 586    | 23.91 | 14.16       | 40.36       |
| 55    | Keski-Suomi       | NPH      | 1268  | 121    | 3465   | 34.92 | 29.22       | 41.73       |
| 56    | Keski-Suomi       | no DGN   | 1450  | 25     | 1026   | 24.37 | 16.47       | 36.06       |
| 57    | Etela-Pohjanmaa   | glargine | 984   | 48     | 1539   | 31.18 | 23.50       | 41.38       |
| 58    | Etela-Pohjanmaa   | detemir  | 739   | 14     | 736    | 19.01 | 11.26       | 32.11       |
| 59    | Etela-Pohjanmaa   | NPH      | 1266  | 159    | 3604   | 44.12 | 37.77       | 51.54       |
| 60    | Etela-Pohjanmaa   | no DGN   | 1535  | 32     | 1064   | 30.07 | 21.27       | 42.53       |
| 61    | Vaasa             | glargine | 254   | 28     | 401    | 69.79 | 48.19       | 101.08      |
| 62    | Vaasa             | detemir  | 293   | 6      | 284    | 21.14 | 9.50        | 47.04       |
| 63    | Vaasa             | NPH      | 498   | 51     | 1477   | 34.54 | 26.25       | 45.45       |
| 64    | Vaasa             | no DGN   | 574   | 17     | 456    | 37.30 | 23.19       | 60.01       |
| 65    | Keski-Pohjanmaa   | glargine | 237   | 7      | 303    | 23.14 | 11.03       | 48.53       |
| 66    | Keski-Pohjanmaa   | detemir  | 200   | 3      | 195    | 15.38 | 4.96        | 47.69       |
| 67    | Keski-Pohjanmaa   | NPH      | 441   | 6      | 1414   | 4.24  | 1.91        | 9.44        |
| 68    | Keski-Pohjanmaa   | no DGN   | 472   | 1      | 325    | 3.08  | 0.43        | 21.86       |
| 69    | Pohjois-Pohjanmaa | glargine | 1506  | 61     | 2633   | 23.17 | 18.03       | 29.78       |
| 70    | Pohjois-Pohjanmaa | detemir  | 502   | 12     | 585    | 20.52 | 11.65       | 36.13       |
| 71    | Pohjois-Pohjanmaa | NPH      | 1593  | 154    | 4329   | 35.58 | 30.38       | 41.66       |
| 72    | Pohjois-Pohjanmaa | no DGN   | 1968  | 29     | 1346   | 21.55 | 14.98       | 31.01       |
| 73    | Kainuu            | glargine | 399   | 14     | 660    | 21.21 | 12.56       | 35.82       |
| 74    | Kainuu            | detemir  | 183   | 0      | 208    | NA    | NA          | NA          |
| 75    | Kainuu            | NPH      | 623   | 24     | 1722   | 13.93 | 9.34        | 20.79       |
| 76    | Kainuu            | no DGN   | 647   | 4      | 367    | 10.89 | 4.09        | 29.01       |
| 77    | Lansi-Pohja       | glargine | 374   | 36     | 575    | 62.63 | 45.18       | 86.83       |
| 78    | Lansi-Pohja       | detemir  | 96    | 6      | 98     | 60.97 | 27.39       | 135.72      |
| 79    | Lansi-Pohja       | NPH      | 421   | 76     | 1140   | 66.69 | 53.27       | 83.51       |
| 80    | Lansi-Pohja       | no DGN   | 482   | 22     | 370    | 59.46 | 39.15       | 90.31       |
| 81    | Lappi             | glargine | 427   | 15     | 704    | 21.30 | 12.84       | 35.33       |
| 82    | Lappi             | detemir  | 154   | 5      | 180    | 27.79 | 11.57       | 66.76       |
| 83    | Lappi             | NPH      | 689   | 40     | 2012   | 19.89 | 14.59       | 27.11       |
| 84    | Lappi             | no DGN   | 712   | 9      | 465    | 19.37 | 10.08       | 37.24       |
| 85    | Ahvenanmaa        | glargine | 15    | 0      | 20     | NA    | NA          | NA          |
| 86    | Ahvenanmaa        | detemir  | 6     | 0      | 8      | NA    | NA          | NA          |
| 87    | Ahvenanmaa        | NPH      | 77    | 2      | 193    | 10.38 | 2.60        | 41.49       |
| 88    | Ahvenanmaa        | no DGN   | 67    | 1      | 47     | 21.45 | 3.02        | 152.23      |
| 89    | Total             | glargine | 20642 | 1129   | 35951  | 31.40 | 29.62       | 33.29       |
| 90    | Total             | detemir  | 9630  | 217    | 10609  | 20.45 | 17.91       | 23.36       |
| 91    | Total             | NPH      | 30722 | 3314   | 100796 | 32.88 | 31.78       | 34.02       |
| 92    | Total             | no DGN   | 34555 | 817    | 29285  | 27.90 | 26.05       | 29.88       |

Naive T2 cohort. Data 28th December 2011

## E Appendix 5: Cox's proportional hazards models

### E.1 First hypoglycemic coma event

Table E.37: The risk for the first hypoglycemic coma event estimated by the Cox's proportional hazards model. Hospital district as strata. Glargine insulin as reference

| S.No. | Variables        | parameter est | std   | Hazard ratio | lower | upper | P-value |
|-------|------------------|---------------|-------|--------------|-------|-------|---------|
| 1     | insulin detemir  | -0.235        | 0.096 | 0.79         | 0.654 | 0.955 | 0.015   |
| 2     | insulin NPH      | 0.038         | 0.061 | 1.039        | 0.922 | 1.17  | 0.534   |
| 3     | insulin no DGN   | -0.038        | 0.072 | 0.963        | 0.836 | 1.108 | 0.596   |
| 4     | gender Female    | -0.076        | 0.037 | 0.926        | 0.862 | 0.996 | 0.038   |
| 5     | agegroupT2 0-19  | -0.058        | 0.355 | 0.944        | 0.471 | 1.892 | 0.871   |
| 6     | agegroupT2 30-39 | -0.071        | 0.229 | 0.932        | 0.594 | 1.461 | 0.758   |
| 7     | agegroupT2 40-49 | 0.206         | 0.212 | 1.229        | 0.811 | 1.864 | 0.331   |
| 8     | agegroupT2 50-59 | 0.131         | 0.209 | 1.14         | 0.757 | 1.717 | 0.531   |
| 9     | agegroupT2 60-69 | 0.32          | 0.209 | 1.378        | 0.915 | 2.075 | 0.125   |
| 10    | agegroupT2 70-79 | 0.489         | 0.21  | 1.631        | 1.081 | 2.46  | 0.02    |
| 11    | agegroupT2 80+   | 0.601         | 0.214 | 1.824        | 1.199 | 2.775 | 0.005   |
| 12    | BB.stfup Yes     | 0.026         | 0.061 | 1.026        | 0.911 | 1.155 | 0.673   |
| 13    | useBB Yes        | 0.038         | 0.042 | 1.039        | 0.957 | 1.127 | 0.364   |
| 14    | A10A.stfup Yes   | 0.078         | 0.082 | 1.081        | 0.921 | 1.269 | 0.342   |
| 15    | useA10A Yes      | 0.399         | 0.044 | 1.49         | 1.366 | 1.625 | <0.001  |
| 16    | hosph.stfup Yes  | 1.422         | 0.045 | 4.144        | 3.796 | 4.524 | <0.001  |
| 17    | Switch YES       | 0.115         | 0.074 | 1.122        | 0.97  | 1.298 | 0.122   |
| 18    | time2diag 1-2    | 0.084         | 0.077 | 1.088        | 0.936 | 1.264 | 0.272   |
| 19    | time2diag 2-5    | -0.058        | 0.062 | 0.943        | 0.835 | 1.066 | 0.348   |
| 20    | time2diag 5-10   | -0.05         | 0.064 | 0.951        | 0.838 | 1.079 | 0.434   |
| 21    | time2diag 10-    | -0.012        | 0.101 | 0.988        | 0.811 | 1.203 | 0.903   |
| 22    | calyear2 06      | -0.282        | 0.07  | 0.755        | 0.658 | 0.865 | <0.001  |
| 23    | calyear2 07      | -0.37         | 0.075 | 0.691        | 0.596 | 0.801 | <0.001  |
| 24    | calyear2 08      | -0.447        | 0.091 | 0.639        | 0.535 | 0.764 | <0.001  |
| 25    | calyear2 09      | -0.727        | 0.141 | 0.483        | 0.367 | 0.637 | <0.001  |

Naive T2 cohort. Data 28th December 2011



Table E.38: The risk for the first hypoglycemic coma event estimated by the Cox's proportional hazards model. Hospital district as strata. NPH insulin as reference

| S.No. | Variables           | parameter est | std   | Hazard ratio | lower | upper | P-value |
|-------|---------------------|---------------|-------|--------------|-------|-------|---------|
| 1     | insulinNPH detemir  | -0.273        | 0.105 | 0.761        | 0.619 | 0.935 | 0.01    |
| 2     | insulinNPH glargine | -0.038        | 0.061 | 0.963        | 0.854 | 1.085 | 0.534   |
| 3     | insulinNPH no DGN   | -0.076        | 0.053 | 0.927        | 0.836 | 1.028 | 0.149   |
| 4     | gender Female       | -0.076        | 0.037 | 0.926        | 0.862 | 0.996 | 0.038   |
| 5     | agegroupT2 0-19     | -0.058        | 0.355 | 0.944        | 0.471 | 1.892 | 0.871   |
| 6     | agegroupT2 30-39    | -0.071        | 0.229 | 0.932        | 0.594 | 1.461 | 0.758   |
| 7     | agegroupT2 40-49    | 0.206         | 0.212 | 1.229        | 0.811 | 1.864 | 0.331   |
| 8     | agegroupT2 50-59    | 0.131         | 0.209 | 1.14         | 0.757 | 1.717 | 0.531   |
| 9     | agegroupT2 60-69    | 0.32          | 0.209 | 1.378        | 0.915 | 2.075 | 0.125   |
| 10    | agegroupT2 70-79    | 0.489         | 0.21  | 1.631        | 1.081 | 2.46  | 0.02    |
| 11    | agegroupT2 80+      | 0.601         | 0.214 | 1.824        | 1.199 | 2.775 | 0.005   |
| 12    | BB.stfup Yes        | 0.026         | 0.061 | 1.026        | 0.911 | 1.155 | 0.673   |
| 13    | useBB Yes           | 0.038         | 0.042 | 1.039        | 0.957 | 1.127 | 0.364   |
| 14    | A10A.stfup Yes      | 0.078         | 0.082 | 1.081        | 0.921 | 1.269 | 0.342   |
| 15    | useA10A Yes         | 0.399         | 0.044 | 1.49         | 1.366 | 1.625 | <0.001  |
| 16    | hosph.stfup Yes     | 1.422         | 0.045 | 4.144        | 3.796 | 4.524 | <0.001  |
| 17    | Switch YES          | 0.115         | 0.074 | 1.122        | 0.97  | 1.298 | 0.122   |
| 18    | time2diag 1-2       | 0.084         | 0.077 | 1.088        | 0.936 | 1.264 | 0.272   |
| 19    | time2diag 2-5       | -0.058        | 0.062 | 0.943        | 0.835 | 1.066 | 0.348   |
| 20    | time2diag 5-10      | -0.05         | 0.064 | 0.951        | 0.838 | 1.079 | 0.434   |
| 21    | time2diag 10-       | -0.012        | 0.101 | 0.988        | 0.811 | 1.203 | 0.903   |
| 22    | calyear2 06         | -0.282        | 0.07  | 0.755        | 0.658 | 0.865 | <0.001  |
| 23    | calyear2 07         | -0.37         | 0.075 | 0.691        | 0.596 | 0.801 | <0.001  |
| 24    | calyear2 08         | -0.447        | 0.091 | 0.639        | 0.535 | 0.764 | <0.001  |
| 25    | calyear2 09         | -0.727        | 0.141 | 0.483        | 0.367 | 0.637 | <0.001  |

Naive T2 cohort. Data 28th December 2011

Table E.39: Sensitivity analysis for the risk of first hypoglycemic coma event estimated by the Cox's proportional hazards model. Hospital district as strata. NPH insulin as reference. I) Original estimates, II) Estimates assuming no gaps in use of detemir, glargine, and NPH-insulins, III) Estimates considering hypoglycemic events with main diagnose E10.00 or E11.00 only,IV) Periods with overlapping use of detemir, glargine, or NPH-insulins are removed, V) follow-up ends at first switch.

| S.No. | Variables           | I     |       |       | II    |       |       | III   |       |       | IV    |       |       | V     |       |       |
|-------|---------------------|-------|-------|-------|-------|-------|-------|-------|-------|-------|-------|-------|-------|-------|-------|-------|
|       |                     | HR    | lower | upper |
| 1     | insulinNPH detemir  | 0.761 | 0.619 | 0.935 | 0.772 | 0.63  | 0.946 | 0.761 | 0.619 | 0.935 | 0.766 | 0.623 | 0.942 | 0.9   | 0.732 | 1.106 |
| 2     | insulinNPH glargine | 0.963 | 0.854 | 1.085 | 0.973 | 0.865 | 1.095 | 0.963 | 0.854 | 1.085 | 0.974 | 0.864 | 1.097 | 0.983 | 0.872 | 1.108 |
| 3     | insulinNPH no DGN   | 0.927 | 0.836 | 1.028 | NA    | NA    | NA    | 0.927 | 0.836 | 1.028 | 0.928 | 0.837 | 1.029 | 0.922 | 0.832 | 1.023 |
| 4     | gender Female       | 0.926 | 0.862 | 0.996 | 0.926 | 0.861 | 0.995 | 0.926 | 0.862 | 0.996 | 0.924 | 0.859 | 0.993 | 0.934 | 0.869 | 1.004 |
| 5     | agegroupT2 0-19     | 0.944 | 0.471 | 1.892 | 0.959 | 0.479 | 1.921 | 0.944 | 0.471 | 1.892 | 0.956 | 0.477 | 1.915 | 0.907 | 0.453 | 1.817 |
| 6     | agegroupT2 30-39    | 0.932 | 0.594 | 1.461 | 0.934 | 0.596 | 1.465 | 0.932 | 0.594 | 1.461 | 0.891 | 0.568 | 1.397 | 0.833 | 0.531 | 1.306 |
| 7     | agegroupT2 40-49    | 1.229 | 0.811 | 1.864 | 1.238 | 0.816 | 1.877 | 1.229 | 0.811 | 1.864 | 1.2   | 0.791 | 1.82  | 1.107 | 0.73  | 1.679 |
| 8     | agegroupT2 50-59    | 1.14  | 0.757 | 1.717 | 1.149 | 0.763 | 1.73  | 1.14  | 0.757 | 1.717 | 1.119 | 0.743 | 1.685 | 1.072 | 0.712 | 1.615 |
| 9     | agegroupT2 60-69    | 1.378 | 0.915 | 2.075 | 1.389 | 0.922 | 2.091 | 1.378 | 0.915 | 2.075 | 1.36  | 0.903 | 2.049 | 1.301 | 0.864 | 1.96  |
| 10    | agegroupT2 70-79    | 1.631 | 1.081 | 2.46  | 1.64  | 1.087 | 2.475 | 1.631 | 1.081 | 2.46  | 1.603 | 1.063 | 2.419 | 1.451 | 0.962 | 2.189 |
| 11    | agegroupT2 80+      | 1.824 | 1.199 | 2.775 | 1.83  | 1.203 | 2.785 | 1.824 | 1.199 | 2.775 | 1.813 | 1.191 | 2.758 | 1.675 | 1.101 | 2.548 |
| 12    | BB.stfup Yes        | 1.026 | 0.911 | 1.155 | 1.029 | 0.914 | 1.158 | 1.026 | 0.911 | 1.155 | 1.024 | 0.909 | 1.153 | 1.04  | 0.924 | 1.171 |
| 13    | useBB Yes           | 1.039 | 0.957 | 1.127 | 1.037 | 0.955 | 1.125 | 1.039 | 0.957 | 1.127 | 1.025 | 0.945 | 1.113 | 1.005 | 0.926 | 1.091 |
| 14    | A10A.stfup Yes      | 1.081 | 0.921 | 1.269 | 1.081 | 0.92  | 1.269 | 1.081 | 0.921 | 1.269 | 1.085 | 0.924 | 1.274 | 1.055 | 0.899 | 1.239 |
| 15    | useA10A Yes         | 1.49  | 1.366 | 1.625 | 1.483 | 1.36  | 1.618 | 1.49  | 1.366 | 1.625 | 1.476 | 1.353 | 1.609 | 1.483 | 1.359 | 1.617 |
| 16    | hosph.stfup Yes     | 4.144 | 3.796 | 4.524 | 4.144 | 3.796 | 4.524 | 4.144 | 3.796 | 4.524 | 4.173 | 3.822 | 4.555 | 4.489 | 4.112 | 4.901 |
| 17    | Switch YES          | 1.122 | 0.97  | 1.298 | 1.13  | 0.974 | 1.312 | 1.122 | 0.97  | 1.298 | 1.064 | 0.919 | 1.231 | NA    | NA    | NA    |
| 18    | time2diag 1-2       | 1.088 | 0.936 | 1.264 | 1.091 | 0.939 | 1.268 | 1.088 | 0.936 | 1.264 | 1.101 | 0.947 | 1.279 | 1.141 | 0.982 | 1.326 |
| 19    | time2diag 2-5       | 0.943 | 0.835 | 1.066 | 0.947 | 0.838 | 1.069 | 0.943 | 0.835 | 1.066 | 0.937 | 0.83  | 1.059 | 0.936 | 0.829 | 1.057 |
| 20    | time2diag 5-10      | 0.951 | 0.838 | 1.079 | 0.954 | 0.841 | 1.082 | 0.951 | 0.838 | 1.079 | 0.944 | 0.832 | 1.071 | 0.944 | 0.832 | 1.071 |
| 21    | time2diag 10-       | 0.988 | 0.811 | 1.203 | 0.991 | 0.813 | 1.207 | 0.988 | 0.811 | 1.203 | 0.983 | 0.807 | 1.198 | 0.967 | 0.794 | 1.178 |
| 22    | calyear2 06         | 0.755 | 0.658 | 0.865 | 0.754 | 0.657 | 0.864 | 0.755 | 0.658 | 0.865 | 0.761 | 0.664 | 0.873 | 0.782 | 0.682 | 0.896 |
| 23    | calyear2 07         | 0.691 | 0.596 | 0.801 | 0.691 | 0.595 | 0.802 | 0.691 | 0.596 | 0.801 | 0.689 | 0.594 | 0.798 | 0.685 | 0.591 | 0.794 |
| 24    | calyear2 08         | 0.639 | 0.535 | 0.764 | 0.64  | 0.534 | 0.767 | 0.639 | 0.535 | 0.764 | 0.627 | 0.524 | 0.749 | 0.625 | 0.523 | 0.747 |
| 25    | calyear2 09         | 0.483 | 0.367 | 0.637 | 0.482 | 0.366 | 0.637 | 0.483 | 0.367 | 0.637 | 0.484 | 0.368 | 0.638 | 0.47  | 0.357 | 0.619 |

Naive T2 cohort. Data 28th December 2011

Table E.40: Sensitivity analysis for the risk of first hypoglycemic coma event estimated by the Cox's proportional hazards model. Hospital district as strata. NPH insulin as reference. I) Original estimates, II-IV) Inverse propensity score weighting (IPW). Individuals weighted by the inverse of the probability to start on their insulin conditional on covariates (gender, typedm, agegroup2, BB.stfup, A10A.stfup, hosp.stfup, time2diag), truncation points givenin paranthesis, III) IPW-weights with no truncation.

| S.No. | Variables           | I     |       |       | II [0.1/0.9] |       |       | III [0.01/0.99] |       |       | IV [0.001/0.999] |       |       | V [0/1] |       |       |
|-------|---------------------|-------|-------|-------|--------------|-------|-------|-----------------|-------|-------|------------------|-------|-------|---------|-------|-------|
|       |                     | HR    | lower | upper | HR           | lower | upper | HR              | lower | upper | HR               | lower | upper | lower   | upper |       |
| 1     | insulinNPH detemir  | 0.761 | 0.619 | 0.935 | 0.801        | 0.642 | 0.998 | 0.734           | 0.566 | 0.953 | 0.732            | 0.564 | 0.95  | 0.372   | 0.287 | 0.483 |
| 2     | insulinNPH glargine | 0.963 | 0.854 | 1.085 | 0.961        | 0.846 | 1.092 | 0.954           | 0.823 | 1.106 | 0.947            | 0.817 | 1.097 | 0.95    | 0.82  | 1.102 |
| 3     | insulinNPH no DGN   | 0.927 | 0.836 | 1.028 | 0.922        | 0.822 | 1.035 | 0.896           | 0.753 | 1.065 | 0.88             | 0.74  | 1.046 | 0.823   | 0.692 | 0.979 |
| 4     | gender Female       | 0.926 | 0.862 | 0.996 | 0.931        | 0.858 | 1.01  | 0.946           | 0.837 | 1.07  | 0.924            | 0.817 | 1.044 | 0.969   | 0.857 | 1.095 |
| 5     | agegroupT2 0-19     | 0.944 | 0.471 | 1.892 | 0.934        | 0.426 | 2.048 | 0.656           | 0.242 | 1.775 | 0.615            | 0.227 | 1.665 | 0.431   | 0.159 | 1.165 |
| 6     | agegroupT2 30-39    | 0.932 | 0.594 | 1.461 | 0.911        | 0.54  | 1.536 | 0.82            | 0.356 | 1.889 | 0.913            | 0.396 | 2.103 | 1.072   | 0.465 | 2.471 |
| 7     | agegroupT2 40-49    | 1.229 | 0.811 | 1.864 | 1.198        | 0.738 | 1.943 | 0.922           | 0.432 | 1.971 | 1                | 0.468 | 2.137 | 1.331   | 0.623 | 2.843 |
| 8     | agegroupT2 50-59    | 1.14  | 0.757 | 1.717 | 1.172        | 0.729 | 1.887 | 0.949           | 0.448 | 2.008 | 1.027            | 0.485 | 2.175 | 1.221   | 0.577 | 2.585 |
| 9     | agegroupT2 60-69    | 1.378 | 0.915 | 2.075 | 1.384        | 0.86  | 2.228 | 1.199           | 0.565 | 2.542 | 1.368            | 0.645 | 2.902 | 1.724   | 0.813 | 3.657 |
| 10    | agegroupT2 70-79    | 1.631 | 1.081 | 2.46  | 1.606        | 0.997 | 2.589 | 1.294           | 0.609 | 2.751 | 1.408            | 0.662 | 2.992 | 1.838   | 0.865 | 3.907 |
| 11    | agegroupT2 80+      | 1.824 | 1.199 | 2.775 | 1.723        | 1.058 | 2.804 | 1.415           | 0.654 | 3.062 | 1.552            | 0.717 | 3.356 | 1.979   | 0.915 | 4.281 |
| 12    | BB.stfup Yes        | 1.026 | 0.911 | 1.155 | 0.991        | 0.866 | 1.134 | 0.985           | 0.799 | 1.214 | 1.028            | 0.834 | 1.268 | 1.097   | 0.89  | 1.353 |
| 13    | useBB Yes           | 1.039 | 0.957 | 1.127 | 1.045        | 0.951 | 1.149 | 1.094           | 0.946 | 1.264 | 1.101            | 0.953 | 1.273 | 1.14    | 0.987 | 1.318 |
| 14    | A10A.stfup Yes      | 1.081 | 0.921 | 1.269 | 1.092        | 0.908 | 1.314 | 1.127           | 0.876 | 1.45  | 1.111            | 0.864 | 1.43  | 1.115   | 0.867 | 1.435 |
| 15    | useA10A Yes         | 1.49  | 1.366 | 1.625 | 1.493        | 1.348 | 1.653 | 1.442           | 1.231 | 1.689 | 1.402            | 1.197 | 1.642 | 1.374   | 1.173 | 1.61  |
| 16    | hosph.stfup Yes     | 4.144 | 3.796 | 4.524 | 4.309        | 3.888 | 4.776 | 4.292           | 3.698 | 4.981 | 4.483            | 3.863 | 5.203 | 4.82    | 4.153 | 5.594 |
| 17    | Switch YES          | 1.122 | 0.97  | 1.298 | 1.113        | 0.946 | 1.31  | 1.117           | 0.892 | 1.399 | 1.16             | 0.927 | 1.453 | 1.141   | 0.911 | 1.428 |
| 18    | time2diag 1-2       | 1.088 | 0.936 | 1.264 | 1.098        | 0.925 | 1.303 | 1.177           | 0.897 | 1.543 | 1.132            | 0.863 | 1.484 | 1.1     | 0.839 | 1.443 |
| 19    | time2diag 2-5       | 0.943 | 0.835 | 1.066 | 0.98         | 0.852 | 1.128 | 1.009           | 0.806 | 1.263 | 0.981            | 0.783 | 1.228 | 0.904   | 0.722 | 1.131 |
| 20    | time2diag 5-10      | 0.951 | 0.838 | 1.079 | 0.968        | 0.837 | 1.118 | 0.988           | 0.787 | 1.24  | 0.976            | 0.777 | 1.225 | 0.938   | 0.747 | 1.177 |
| 21    | time2diag 10-       | 0.988 | 0.811 | 1.203 | 1.008        | 0.806 | 1.261 | 1.007           | 0.729 | 1.39  | 0.932            | 0.675 | 1.286 | 0.893   | 0.647 | 1.234 |
| 22    | calyear2 06         | 0.755 | 0.658 | 0.865 | 0.805        | 0.688 | 0.942 | 0.882           | 0.702 | 1.108 | 0.945            | 0.752 | 1.188 | 1.188   | 0.946 | 1.493 |
| 23    | calyear2 07         | 0.691 | 0.596 | 0.801 | 0.685        | 0.588 | 0.798 | 0.706           | 0.588 | 0.849 | 0.714            | 0.594 | 0.858 | 0.913   | 0.759 | 1.097 |
| 24    | calyear2 08         | 0.639 | 0.535 | 0.764 | 0.646        | 0.537 | 0.776 | 0.667           | 0.541 | 0.822 | 0.667            | 0.541 | 0.822 | 0.863   | 0.7   | 1.064 |
| 25    | calyear2 09         | 0.483 | 0.367 | 0.637 | 0.504        | 0.375 | 0.676 | 0.624           | 0.436 | 0.894 | 0.614            | 0.429 | 0.879 | 0.783   | 0.547 | 1.121 |

Naive T2 cohort. Data 28th December 2011

Table E.41: sensitivity analysis for the risk for the first hypoglycemic coma event estimated by the Cox's proportional hazards model. The probability conditional on covariates (gender, typedm, agegroup2, calyear2, BB.stfup, A10A.stfup, hosph.stfup, time2diag) to initiate treatment with detemir and glargine as two additional covariates. Hospital district as strata. NPH insulin as reference

| S.No. | Variables           | parameter est | std   | Hazard ratio | lower | upper  | P-value |
|-------|---------------------|---------------|-------|--------------|-------|--------|---------|
| 1     | insulinNPH detemir  | -0.282        | 0.106 | 0.754        | 0.613 | 0.928  | 0.008   |
| 2     | insulinNPH glargine | -0.04         | 0.061 | 0.961        | 0.853 | 1.083  | 0.517   |
| 3     | insulinNPH no DGN   | -0.077        | 0.053 | 0.926        | 0.835 | 1.027  | 0.145   |
| 4     | gender Female       | -0.08         | 0.037 | 0.923        | 0.857 | 0.993  | 0.031   |
| 5     | agegroupT2 0-19     | -0.054        | 0.372 | 0.948        | 0.457 | 1.965  | 0.885   |
| 6     | agegroupT2 30-39    | -0.08         | 0.231 | 0.923        | 0.587 | 1.452  | 0.73    |
| 7     | agegroupT2 40-49    | 0.203         | 0.213 | 1.225        | 0.807 | 1.859  | 0.34    |
| 8     | agegroupT2 50-59    | 0.126         | 0.21  | 1.135        | 0.752 | 1.712  | 0.548   |
| 9     | agegroupT2 60-69    | 0.312         | 0.213 | 1.366        | 0.9   | 2.071  | 0.143   |
| 10    | agegroupT2 70-79    | 0.488         | 0.215 | 1.629        | 1.069 | 2.482  | 0.023   |
| 11    | agegroupT2 80+      | 0.613         | 0.219 | 1.846        | 1.202 | 2.837  | 0.005   |
| 12    | BB.stfup Yes        | 0.036         | 0.068 | 1.037        | 0.907 | 1.184  | 0.598   |
| 13    | useBB Yes           | 0.037         | 0.042 | 1.038        | 0.956 | 1.127  | 0.371   |
| 14    | A10A.stfup Yes      | 0.065         | 0.093 | 1.067        | 0.89  | 1.28   | 0.482   |
| 15    | useA10A Yes         | 0.399         | 0.044 | 1.49         | 1.366 | 1.625  | <0.001  |
| 16    | hosph.stfup Yes     | 1.433         | 0.046 | 4.19         | 3.83  | 4.585  | <0.001  |
| 17    | Switch YES          | 0.118         | 0.075 | 1.126        | 0.973 | 1.303  | 0.112   |
| 18    | calyear2 06         | -0.285        | 0.089 | 0.752        | 0.632 | 0.894  | 0.001   |
| 19    | calyear2 07         | -0.371        | 0.547 | 0.69         | 0.236 | 2.015  | 0.498   |
| 20    | calyear2 08         | -0.544        | 0.763 | 0.581        | 0.13  | 2.59   | 0.476   |
| 21    | calyear2 09         | -0.912        | 0.836 | 0.402        | 0.078 | 2.067  | 0.275   |
| 22    | time2diag 1-2       | 0.079         | 0.077 | 1.082        | 0.93  | 1.258  | 0.308   |
| 23    | time2diag 2-5       | -0.06         | 0.066 | 0.941        | 0.827 | 1.072  | 0.363   |
| 24    | time2diag 5-10      | -0.049        | 0.077 | 0.953        | 0.819 | 1.108  | 0.529   |
| 25    | time2diag 10-       | 0.009         | 0.115 | 1.009        | 0.805 | 1.264  | 0.939   |
| 26    | Pdet                | 1.144         | 1.169 | 3.14         | 0.317 | 31.074 | 0.328   |
| 27    | Pgla                | -0.369        | 1.26  | 0.692        | 0.059 | 8.168  | 0.77    |

Naive T2 cohort. Data 28th December 2011

Table E.42: The risk for the first hypoglycemic coma event estimated by the Cox's proportional hazards model. Hospital district as strata. Glargine insulin as reference. Data before 2006 censored

| S.No. | Variables        | parameter est | std   | Hazard ratio | lower | upper  | P-value |
|-------|------------------|---------------|-------|--------------|-------|--------|---------|
| 1     | insulin detemir  | -0.067        | 0.118 | 0.936        | 0.743 | 1.178  | 0.572   |
| 2     | insulin NPH      | 0.008         | 0.097 | 1.008        | 0.834 | 1.219  | 0.934   |
| 3     | insulin no DGN   | -0.005        | 0.135 | 0.995        | 0.764 | 1.296  | 0.973   |
| 4     | gender Female    | -0.144        | 0.077 | 0.866        | 0.744 | 1.008  | 0.062   |
| 5     | agegroupT2 0-19  | 0.797         | 0.916 | 2.22         | 0.368 | 13.369 | 0.384   |
| 6     | agegroupT2 30-39 | 0.176         | 0.763 | 1.193        | 0.268 | 5.319  | 0.817   |
| 7     | agegroupT2 40-49 | 0.715         | 0.721 | 2.044        | 0.498 | 8.394  | 0.321   |
| 8     | agegroupT2 50-59 | 0.765         | 0.715 | 2.15         | 0.529 | 8.737  | 0.285   |
| 9     | agegroupT2 60-69 | 0.799         | 0.715 | 2.223        | 0.547 | 9.033  | 0.264   |
| 10    | agegroupT2 70-79 | 0.881         | 0.717 | 2.413        | 0.592 | 9.835  | 0.219   |
| 11    | agegroupT2 80+   | 0.871         | 0.721 | 2.389        | 0.582 | 9.809  | 0.227   |
| 12    | BB.stfup Yes     | -0.151        | 0.115 | 0.86         | 0.687 | 1.077  | 0.188   |
| 13    | useBB Yes        | 0.045         | 0.092 | 1.046        | 0.873 | 1.254  | 0.624   |
| 14    | A10A.stfup Yes   | -0.028        | 0.152 | 0.973        | 0.722 | 1.311  | 0.855   |
| 15    | useA10A Yes      | 0.45          | 0.092 | 1.569        | 1.309 | 1.88   | <0.001  |
| 16    | hosph.stfup Yes  | 1.702         | 0.08  | 5.484        | 4.692 | 6.408  | <0.001  |
| 17    | Switch YES       | 0.179         | 0.143 | 1.196        | 0.904 | 1.582  | 0.211   |
| 18    | time2diag 1-2    | -0.178        | 0.186 | 0.837        | 0.581 | 1.205  | 0.338   |
| 19    | time2diag 2-5    | 0.022         | 0.125 | 1.022        | 0.799 | 1.306  | 0.863   |
| 20    | time2diag 5-10   | -0.102        | 0.129 | 0.903        | 0.701 | 1.164  | 0.431   |
| 21    | time2diag 10-    | -0.043        | 0.157 | 0.958        | 0.703 | 1.304  | 0.783   |
| 22    | calyear3 07      | -0.22         | 0.098 | 0.802        | 0.662 | 0.972  | 0.025   |
| 23    | calyear3 08      | -0.377        | 0.116 | 0.686        | 0.547 | 0.86   | 0.001   |
| 24    | calyear3 09      | -0.704        | 0.162 | 0.495        | 0.36  | 0.679  | <0.001  |

Naive T2 cohort. Data 28th December 2011

Table E.43: The risk for the first hypoglycemic coma event estimated by the Cox's proportional hazards model. Hospital district as strata. NPH insulin as reference. Data before 2006 censored

| S.No. | Variables           | parameter est | std   | Hazard ratio | lower | upper  | P-value |
|-------|---------------------|---------------|-------|--------------|-------|--------|---------|
| 1     | insulinNPH detemir  | -0.074        | 0.133 | 0.928        | 0.715 | 1.204  | 0.575   |
| 2     | insulinNPH glargine | -0.008        | 0.097 | 0.992        | 0.82  | 1.2    | 0.934   |
| 3     | insulinNPH no DGN   | -0.013        | 0.132 | 0.988        | 0.762 | 1.28   | 0.925   |
| 4     | gender Female       | -0.144        | 0.077 | 0.866        | 0.744 | 1.008  | 0.062   |
| 5     | agegroupT2 0-19     | 0.797         | 0.916 | 2.22         | 0.368 | 13.369 | 0.384   |
| 6     | agegroupT2 30-39    | 0.176         | 0.763 | 1.193        | 0.268 | 5.319  | 0.817   |
| 7     | agegroupT2 40-49    | 0.715         | 0.721 | 2.044        | 0.498 | 8.394  | 0.321   |
| 8     | agegroupT2 50-59    | 0.765         | 0.715 | 2.15         | 0.529 | 8.737  | 0.285   |
| 9     | agegroupT2 60-69    | 0.799         | 0.715 | 2.223        | 0.547 | 9.033  | 0.264   |
| 10    | agegroupT2 70-79    | 0.881         | 0.717 | 2.413        | 0.592 | 9.835  | 0.219   |
| 11    | agegroupT2 80+      | 0.871         | 0.721 | 2.389        | 0.582 | 9.809  | 0.227   |
| 12    | BB.stfup Yes        | -0.151        | 0.115 | 0.86         | 0.687 | 1.077  | 0.188   |
| 13    | useBB Yes           | 0.045         | 0.092 | 1.046        | 0.873 | 1.254  | 0.624   |
| 14    | A10A.stfup Yes      | -0.028        | 0.152 | 0.973        | 0.722 | 1.311  | 0.855   |
| 15    | useA10A Yes         | 0.45          | 0.092 | 1.569        | 1.309 | 1.88   | <0.001  |
| 16    | hosph.stfup Yes     | 1.702         | 0.08  | 5.484        | 4.692 | 6.408  | <0.001  |
| 17    | Switch YES          | 0.179         | 0.143 | 1.196        | 0.904 | 1.582  | 0.211   |
| 18    | time2diag 1-2       | -0.178        | 0.186 | 0.837        | 0.581 | 1.205  | 0.338   |
| 19    | time2diag 2-5       | 0.022         | 0.125 | 1.022        | 0.799 | 1.306  | 0.863   |
| 20    | time2diag 5-10      | -0.102        | 0.129 | 0.903        | 0.701 | 1.164  | 0.431   |
| 21    | time2diag 10-       | -0.043        | 0.157 | 0.958        | 0.703 | 1.304  | 0.783   |
| 22    | calyear3 07         | -0.22         | 0.098 | 0.802        | 0.662 | 0.972  | 0.025   |
| 23    | calyear3 08         | -0.377        | 0.116 | 0.686        | 0.547 | 0.86   | 0.001   |
| 24    | calyear3 09         | -0.704        | 0.162 | 0.495        | 0.36  | 0.679  | <0.001  |

Naive T2 cohort. Data 28th December 2011

## E.2 Recurrence of hypoglycemic coma events

Table E.44: The risk for recurrence of hypoglycemic coma events estimated by the Cox's proportional hazards model. Hospital district as strata. Glargine insulin as reference

| S.No. | Variables        | parameter est | std   | Hazard ratio | lower | upper  | P-value |
|-------|------------------|---------------|-------|--------------|-------|--------|---------|
| 1     | insulin detemir  | -0.526        | 0.273 | 0.591        | 0.346 | 1.008  | 0.054   |
| 2     | insulin NPH      | 0.15          | 0.125 | 1.162        | 0.909 | 1.486  | 0.231   |
| 3     | insulin no DGN   | -0.288        | 0.13  | 0.749        | 0.581 | 0.967  | 0.026   |
| 4     | gender Female    | -0.257        | 0.129 | 0.773        | 0.601 | 0.995  | 0.045   |
| 5     | agegroupT2 0-19  | 0.326         | 0.611 | 1.386        | 0.418 | 4.592  | 0.594   |
| 6     | agegroupT2 30-39 | 0.024         | 0.696 | 1.024        | 0.262 | 4.005  | 0.973   |
| 7     | agegroupT2 40-49 | -0.311        | 0.544 | 0.733        | 0.252 | 2.128  | 0.568   |
| 8     | agegroupT2 50-59 | -0.9          | 0.505 | 0.407        | 0.151 | 1.094  | 0.075   |
| 9     | agegroupT2 60-69 | -0.833        | 0.504 | 0.435        | 0.162 | 1.168  | 0.098   |
| 10    | agegroupT2 70-79 | -0.883        | 0.498 | 0.414        | 0.156 | 1.098  | 0.076   |
| 11    | agegroupT2 80+   | -1.08         | 0.514 | 0.34         | 0.124 | 0.929  | 0.036   |
| 12    | BB.stfup Yes     | -0.504        | 0.39  | 0.604        | 0.281 | 1.296  | 0.195   |
| 13    | useBB Yes        | -0.056        | 0.094 | 0.946        | 0.787 | 1.137  | 0.554   |
| 14    | A10A.stfup Yes   | 0.237         | 0.391 | 1.267        | 0.589 | 2.725  | 0.545   |
| 15    | useA10A Yes      | 0.489         | 0.145 | 1.631        | 1.229 | 2.166  | <0.001  |
| 16    | hosph.stfup Yes  | -0.265        | 0.176 | 0.767        | 0.543 | 1.083  | 0.132   |
| 17    | Switch YES       | 0.017         | 0.192 | 1.017        | 0.698 | 1.483  | 0.928   |
| 18    | time2diag 1-2    | 0.31          | 0.347 | 1.364        | 0.691 | 2.689  | 0.371   |
| 19    | time2diag 2-5    | 0.122         | 0.383 | 1.13         | 0.534 | 2.393  | 0.749   |
| 20    | time2diag 5-10   | 0.41          | 0.444 | 1.507        | 0.631 | 3.594  | 0.356   |
| 21    | time2diag 10-    | 1.306         | 0.828 | 3.693        | 0.728 | 18.727 | 0.115   |
| 22    | calyear2 06      | -0.15         | 0.229 | 0.861        | 0.55  | 1.348  | 0.512   |
| 23    | calyear2 07      | -0.368        | 0.24  | 0.692        | 0.432 | 1.108  | 0.125   |
| 24    | calyear2 08      | -0.475        | 0.233 | 0.622        | 0.394 | 0.981  | 0.041   |
| 25    | calyear2 09      | -0.723        | 0.437 | 0.485        | 0.206 | 1.142  | 0.098   |

Naive T2 cohort. Data 28th December 2011



Table E.45: The risk for recurrence of hypoglycemic coma events estimated by the Cox's proportional hazards model. Hospital district as strata. NPH insulin as reference

| S.No. | Variables           | parameter est | std   | Hazard ratio | lower | upper  | P-value |
|-------|---------------------|---------------|-------|--------------|-------|--------|---------|
| 1     | insulinNPH detemir  | -0.677        | 0.289 | 0.508        | 0.289 | 0.895  | 0.019   |
| 2     | insulinNPH glargine | -0.15         | 0.125 | 0.861        | 0.673 | 1.1    | 0.231   |
| 3     | insulinNPH no DGN   | -0.439        | 0.11  | 0.645        | 0.52  | 0.8    | <0.001  |
| 4     | gender Female       | -0.257        | 0.129 | 0.773        | 0.601 | 0.995  | 0.045   |
| 5     | agegroupT2 0-19     | 0.326         | 0.611 | 1.386        | 0.418 | 4.592  | 0.594   |
| 6     | agegroupT2 30-39    | 0.024         | 0.696 | 1.024        | 0.262 | 4.005  | 0.973   |
| 7     | agegroupT2 40-49    | -0.311        | 0.544 | 0.733        | 0.252 | 2.128  | 0.568   |
| 8     | agegroupT2 50-59    | -0.9          | 0.505 | 0.407        | 0.151 | 1.094  | 0.075   |
| 9     | agegroupT2 60-69    | -0.833        | 0.504 | 0.435        | 0.162 | 1.168  | 0.098   |
| 10    | agegroupT2 70-79    | -0.883        | 0.498 | 0.414        | 0.156 | 1.098  | 0.076   |
| 11    | agegroupT2 80+      | -1.08         | 0.514 | 0.34         | 0.124 | 0.929  | 0.036   |
| 12    | BB.stfup Yes        | -0.504        | 0.39  | 0.604        | 0.281 | 1.296  | 0.195   |
| 13    | useBB Yes           | -0.056        | 0.094 | 0.946        | 0.787 | 1.137  | 0.554   |
| 14    | A10A.stfup Yes      | 0.237         | 0.391 | 1.267        | 0.589 | 2.725  | 0.545   |
| 15    | useA10A Yes         | 0.489         | 0.145 | 1.631        | 1.229 | 2.166  | <0.001  |
| 16    | hosph.stfup Yes     | -0.265        | 0.176 | 0.767        | 0.543 | 1.083  | 0.132   |
| 17    | Switch YES          | 0.017         | 0.192 | 1.017        | 0.698 | 1.483  | 0.928   |
| 18    | time2diag 1-2       | 0.31          | 0.347 | 1.364        | 0.691 | 2.689  | 0.371   |
| 19    | time2diag 2-5       | 0.122         | 0.383 | 1.13         | 0.534 | 2.393  | 0.749   |
| 20    | time2diag 5-10      | 0.41          | 0.444 | 1.507        | 0.631 | 3.594  | 0.356   |
| 21    | time2diag 10-       | 1.306         | 0.828 | 3.693        | 0.728 | 18.727 | 0.115   |
| 22    | calyear2 06         | -0.15         | 0.229 | 0.861        | 0.55  | 1.348  | 0.512   |
| 23    | calyear2 07         | -0.368        | 0.24  | 0.692        | 0.432 | 1.108  | 0.125   |
| 24    | calyear2 08         | -0.475        | 0.233 | 0.622        | 0.394 | 0.981  | 0.041   |
| 25    | calyear2 09         | -0.723        | 0.437 | 0.485        | 0.206 | 1.142  | 0.098   |

Naive T2 cohort. Data 28th December 2011



Table E.46: Sensitivity analysis of the risk for recurrence of hypoglycemic coma events estimated by the Cox's proportional hazards model. Hospital district as strata. NPH insulin as reference. I) Original estimates, II) Estimates assuming no gaps in use of detemir, glargine, and NPH-insulins, III) Estimates considering hypoglycemic events with main diagnose E10.00 or E11.00 only, IV) Periods with overlapping use of detemir, glargine, or NPH-insulins are removed, V) follow-up ends at first switch.

| S.No. | Variables           | I     |       |        | II    |       |       | III   |       |        | IV    |       |       | V     |       |        |
|-------|---------------------|-------|-------|--------|-------|-------|-------|-------|-------|--------|-------|-------|-------|-------|-------|--------|
|       |                     | HR    | lower | upper  | HR    | lower | upper | HR    | lower | upper  | HR    | lower | upper | HR    | lower | upper  |
| 1     | insulinNPH detemir  | 0.508 | 0.289 | 0.895  | 0.499 | 0.274 | 0.909 | 0.347 | 0.175 | 0.687  | 0.461 | 0.233 | 0.915 | 0.648 | 0.327 | 1.286  |
| 2     | insulinNPH glargine | 0.861 | 0.673 | 1.1    | 0.88  | 0.691 | 1.122 | 0.841 | 0.641 | 1.103  | 0.842 | 0.642 | 1.104 | 0.775 | 0.591 | 1.016  |
| 3     | insulinNPH no DGN   | 0.645 | 0.52  | 0.8    | NA    | NA    | NA    | 0.624 | 0.486 | 0.803  | 0.646 | 0.503 | 0.831 | 0.651 | 0.506 | 0.837  |
| 4     | gender Female       | 0.773 | 0.601 | 0.995  | 0.774 | 0.603 | 0.994 | 0.736 | 0.545 | 0.993  | 0.77  | 0.57  | 1.04  | 0.814 | 0.603 | 1.099  |
| 5     | agegroupT2 0-19     | 1.386 | 0.418 | 4.592  | 1.449 | 0.436 | 4.82  | 2.102 | 0.519 | 8.509  | 1.496 | 0.37  | 6.058 | 1.617 | 0.4   | 6.548  |
| 6     | agegroupT2 30-39    | 1.024 | 0.262 | 4.005  | 1.077 | 0.275 | 4.218 | 1.422 | 0.318 | 6.357  | 1.035 | 0.232 | 4.625 | 0.562 | 0.126 | 2.511  |
| 7     | agegroupT2 40-49    | 0.733 | 0.252 | 2.128  | 0.776 | 0.269 | 2.238 | 1.033 | 0.296 | 3.609  | 0.736 | 0.211 | 2.57  | 0.529 | 0.152 | 1.848  |
| 8     | agegroupT2 50-59    | 0.407 | 0.151 | 1.094  | 0.432 | 0.161 | 1.157 | 0.486 | 0.15  | 1.576  | 0.394 | 0.122 | 1.279 | 0.288 | 0.089 | 0.933  |
| 9     | agegroupT2 60-69    | 0.435 | 0.162 | 1.168  | 0.455 | 0.169 | 1.22  | 0.537 | 0.166 | 1.739  | 0.435 | 0.134 | 1.408 | 0.321 | 0.099 | 1.041  |
| 10    | agegroupT2 70-79    | 0.414 | 0.156 | 1.098  | 0.43  | 0.163 | 1.136 | 0.436 | 0.137 | 1.394  | 0.413 | 0.129 | 1.32  | 0.296 | 0.093 | 0.945  |
| 11    | agegroupT2 80+      | 0.34  | 0.124 | 0.929  | 0.344 | 0.126 | 0.937 | 0.395 | 0.118 | 1.324  | 0.337 | 0.101 | 1.129 | 0.228 | 0.068 | 0.762  |
| 12    | BB.stfup Yes        | 0.604 | 0.281 | 1.296  | 0.602 | 0.28  | 1.294 | 0.624 | 0.274 | 1.418  | 0.624 | 0.275 | 1.419 | 0.813 | 0.357 | 1.847  |
| 13    | useBB Yes           | 0.946 | 0.787 | 1.137  | 0.938 | 0.781 | 1.128 | 0.94  | 0.758 | 1.167  | 0.94  | 0.757 | 1.167 | 0.912 | 0.735 | 1.132  |
| 14    | A10A.stfup Yes      | 1.267 | 0.589 | 2.725  | 1.249 | 0.58  | 2.688 | 1.333 | 0.551 | 3.225  | 1.312 | 0.542 | 3.173 | 1.449 | 0.599 | 3.504  |
| 15    | useA10A Yes         | 1.631 | 1.229 | 2.166  | 1.611 | 1.213 | 2.14  | 1.914 | 1.406 | 2.605  | 1.635 | 1.201 | 2.225 | 1.6   | 1.175 | 2.177  |
| 16    | hosph.stfup Yes     | 0.767 | 0.543 | 1.083  | 0.772 | 0.548 | 1.087 | 0.848 | 0.585 | 1.231  | 0.763 | 0.526 | 1.108 | 0.64  | 0.441 | 0.928  |
| 17    | Switch YES          | 1.017 | 0.698 | 1.483  | 1.093 | 0.725 | 1.649 | 0.973 | 0.639 | 1.481  | 0.949 | 0.623 | 1.445 | NA    | NA    | NA     |
| 18    | time2diag 1-2       | 1.364 | 0.691 | 2.689  | 1.363 | 0.694 | 2.678 | 1.202 | 0.579 | 2.496  | 1.333 | 0.642 | 2.768 | 1.056 | 0.509 | 2.192  |
| 19    | time2diag 2-5       | 1.13  | 0.534 | 2.393  | 1.16  | 0.547 | 2.463 | 0.996 | 0.447 | 2.216  | 1.133 | 0.509 | 2.521 | 0.945 | 0.424 | 2.102  |
| 20    | time2diag 5-10      | 1.507 | 0.631 | 3.594  | 1.536 | 0.642 | 3.675 | 1.408 | 0.544 | 3.648  | 1.5   | 0.579 | 3.887 | 1.232 | 0.475 | 3.191  |
| 21    | time2diag 10-       | 3.693 | 0.728 | 18.727 | 3.782 | 0.746 | 19.18 | 4.097 | 0.769 | 21.814 | 3.698 | 0.695 | 19.69 | 2.13  | 0.4   | 11.343 |
| 22    | calyear2 06         | 0.861 | 0.55  | 1.348  | 0.85  | 0.545 | 1.327 | 0.854 | 0.516 | 1.413  | 0.882 | 0.533 | 1.46  | 0.949 | 0.574 | 1.571  |
| 23    | calyear2 07         | 0.692 | 0.432 | 1.108  | 0.707 | 0.45  | 1.11  | 0.609 | 0.353 | 1.053  | 0.723 | 0.418 | 1.25  | 0.846 | 0.489 | 1.462  |
| 24    | calyear2 08         | 0.622 | 0.394 | 0.981  | 0.647 | 0.416 | 1.008 | 0.53  | 0.309 | 0.909  | 0.621 | 0.362 | 1.066 | 0.629 | 0.366 | 1.079  |
| 25    | calyear2 09         | 0.485 | 0.206 | 1.142  | 0.489 | 0.21  | 1.142 | 0.396 | 0.159 | 0.987  | 0.51  | 0.205 | 1.272 | 0.464 | 0.186 | 1.157  |

Naive T2 cohort. Data 28th December 2011

Table E.47: Sensitivity analysis of the risk for recurrence of hypoglycemic coma events estimated by the Cox's proportional hazards model. Hospital district as strata. NPH insulin as reference. I) Original estimates, II-IV) Inverse propensity score weighting (IPW). Individuals weighted by the inverse of the probability to start on their insulin conditional on covariates (gender, typedm, agegroup2, BB.stfup, A10A.stfup, hosp.h.stfup, time2diag), truncation points givenin paranthesis, III) IPW-weights with no truncation.

| S.No. | Variables           | I     |       |        | II [0.1/0.9] |       |        | III [0.01/0.99] |       |        | IV [0.001/0.999] |       |        | V [0/1] |       |        |
|-------|---------------------|-------|-------|--------|--------------|-------|--------|-----------------|-------|--------|------------------|-------|--------|---------|-------|--------|
|       |                     | HR    | lower | upper  | HR           | lower | upper  | HR              | lower | upper  | HR               | lower | upper  | HR      | lower | upper  |
| 1     | insulinNPH detemir  | 0.508 | 0.289 | 0.895  | 0.517        | 0.297 | 0.9    | 0.603           | 0.34  | 1.069  | 0.671            | 0.379 | 1.189  | 0.737   | 0.416 | 1.306  |
| 2     | insulinNPH glargine | 0.861 | 0.673 | 1.1    | 0.822        | 0.632 | 1.07   | 0.8             | 0.611 | 1.047  | 0.805            | 0.615 | 1.053  | 0.796   | 0.608 | 1.042  |
| 3     | insulinNPH no DGN   | 0.645 | 0.52  | 0.8    | 0.483        | 0.384 | 0.608  | 0.476           | 0.379 | 0.599  | 0.47             | 0.373 | 0.59   | 0.466   | 0.37  | 0.585  |
| 4     | gender Female       | 0.773 | 0.601 | 0.995  | 0.753        | 0.602 | 0.942  | 0.748           | 0.598 | 0.935  | 0.737            | 0.59  | 0.922  | 0.763   | 0.61  | 0.954  |
| 5     | agegroupT2 0-19     | 1.386 | 0.418 | 4.592  | 4.046        | 1.177 | 13.908 | 4.279           | 1.278 | 14.321 | 4.438            | 1.326 | 14.854 | 4.221   | 1.261 | 14.128 |
| 6     | agegroupT2 30-39    | 1.024 | 0.262 | 4.005  | 3.351        | 0.925 | 12.146 | 3.465           | 0.941 | 12.764 | 3.302            | 0.896 | 12.165 | 3.272   | 0.888 | 12.053 |
| 7     | agegroupT2 40-49    | 0.733 | 0.252 | 2.128  | 1.927        | 0.702 | 5.286  | 1.98            | 0.723 | 5.422  | 1.785            | 0.652 | 4.887  | 1.799   | 0.657 | 4.925  |
| 8     | agegroupT2 50-59    | 0.407 | 0.151 | 1.094  | 1.255        | 0.468 | 3.366  | 1.321           | 0.496 | 3.519  | 1.341            | 0.503 | 3.573  | 1.373   | 0.515 | 3.658  |
| 9     | agegroupT2 60-69    | 0.435 | 0.162 | 1.168  | 1.495        | 0.545 | 4.1    | 1.546           | 0.568 | 4.209  | 1.547            | 0.568 | 4.213  | 1.678   | 0.616 | 4.569  |
| 10    | agegroupT2 70-79    | 0.414 | 0.156 | 1.098  | 1.412        | 0.524 | 3.804  | 1.462           | 0.547 | 3.911  | 1.386            | 0.518 | 3.707  | 1.437   | 0.537 | 3.845  |
| 11    | agegroupT2 80+      | 0.34  | 0.124 | 0.929  | 1.098        | 0.395 | 3.054  | 1.127           | 0.408 | 3.116  | 1.075            | 0.389 | 2.973  | 1.12    | 0.405 | 3.095  |
| 12    | BB.stfup Yes        | 0.604 | 0.281 | 1.296  | 0.597        | 0.271 | 1.311  | 0.619           | 0.286 | 1.341  | 0.699            | 0.323 | 1.515  | 0.683   | 0.315 | 1.479  |
| 13    | useBB Yes           | 0.946 | 0.787 | 1.137  | 0.958        | 0.786 | 1.167  | 1               | 0.804 | 1.244  | 1.007            | 0.81  | 1.253  | 1.015   | 0.816 | 1.263  |
| 14    | A10A.stfup Yes      | 1.267 | 0.589 | 2.725  | 1.656        | 0.785 | 3.491  | 1.548           | 0.73  | 3.285  | 1.575            | 0.742 | 3.341  | 1.542   | 0.727 | 3.271  |
| 15    | useA10A Yes         | 1.631 | 1.229 | 2.166  | 1.527        | 1.175 | 1.984  | 1.494           | 1.142 | 1.955  | 1.41             | 1.077 | 1.844  | 1.429   | 1.092 | 1.87   |
| 16    | hosp.h.stfup Yes    | 0.767 | 0.543 | 1.083  | 0.849        | 0.602 | 1.198  | 0.851           | 0.602 | 1.204  | 0.851            | 0.601 | 1.203  | 0.907   | 0.641 | 1.283  |
| 17    | Switch YES          | 1.017 | 0.698 | 1.483  | 1.207        | 0.807 | 1.806  | 1.257           | 0.835 | 1.891  | 1.289            | 0.856 | 1.94   | 1.29    | 0.857 | 1.941  |
| 18    | time2diag 1-2       | 1.364 | 0.691 | 2.689  | 1.44         | 0.704 | 2.945  | 1.484           | 0.724 | 3.042  | 1.565            | 0.763 | 3.207  | 1.534   | 0.749 | 3.145  |
| 19    | time2diag 2-5       | 1.13  | 0.534 | 2.393  | 1.092        | 0.505 | 2.362  | 1.109           | 0.514 | 2.393  | 1.079            | 0.5   | 2.328  | 1.059   | 0.491 | 2.285  |
| 20    | time2diag 5-10      | 1.507 | 0.631 | 3.594  | 1.315        | 0.57  | 3.035  | 1.262           | 0.548 | 2.905  | 1.153            | 0.501 | 2.653  | 1.135   | 0.493 | 2.613  |
| 21    | time2diag 10-       | 3.693 | 0.728 | 18.727 | 3.693        | 0.75  | 18.187 | 3.418           | 0.685 | 17.058 | 3.253            | 0.652 | 16.233 | 3.222   | 0.646 | 16.08  |
| 22    | calyear2 06         | 0.861 | 0.55  | 1.348  | 0.77         | 0.482 | 1.23   | 0.804           | 0.497 | 1.302  | 0.8              | 0.494 | 1.295  | 0.787   | 0.486 | 1.274  |
| 23    | calyear2 07         | 0.692 | 0.432 | 1.108  | 0.64         | 0.376 | 1.089  | 0.63            | 0.37  | 1.072  | 0.633            | 0.372 | 1.077  | 0.625   | 0.367 | 1.064  |
| 24    | calyear2 08         | 0.622 | 0.394 | 0.981  | 0.63         | 0.387 | 1.025  | 0.651           | 0.408 | 1.038  | 0.667            | 0.418 | 1.063  | 0.664   | 0.416 | 1.058  |
| 25    | calyear2 09         | 0.485 | 0.206 | 1.142  | 0.552        | 0.24  | 1.267  | 0.451           | 0.208 | 0.977  | 0.461            | 0.213 | 0.999  | 0.452   | 0.209 | 0.978  |

Naive T2 cohort. Data 28th December 2011

Table E.48: sensitivity analysis of the risk for recurrence of hypoglycemic coma events estimated by the Cox's proportional hazards model. The probability, conditional on covariates (gender, typedm, agegroup2, calyear2, BB.stfup, A10A.stfup, hosph.stfup, time2diag) to initiate treatment with detemir and glargine as two additional covariates. Hospital district as strata. NPH insulin as reference

| S.No. | Variables           | parameter est | std   | Hazard ratio | lower | upper    | P-value |
|-------|---------------------|---------------|-------|--------------|-------|----------|---------|
| 1     | insulinNPH detemir  | -0.597        | 0.279 | 0.55         | 0.318 | 0.951    | 0.032   |
| 2     | insulinNPH glargine | -0.148        | 0.127 | 0.862        | 0.672 | 1.106    | 0.244   |
| 3     | insulinNPH no DGN   | -0.436        | 0.108 | 0.647        | 0.524 | 0.799    | <0.001  |
| 4     | gender Female       | -0.193        | 0.128 | 0.825        | 0.642 | 1.06     | 0.133   |
| 5     | agegroupT2 0-19     | 0.731         | 0.898 | 2.078        | 0.357 | 12.074   | 0.415   |
| 6     | agegroupT2 30-39    | 0.185         | 0.729 | 1.203        | 0.288 | 5.026    | 0.8     |
| 7     | agegroupT2 40-49    | -0.192        | 0.552 | 0.826        | 0.28  | 2.435    | 0.728   |
| 8     | agegroupT2 50-59    | -0.889        | 0.527 | 0.411        | 0.146 | 1.155    | 0.092   |
| 9     | agegroupT2 60-69    | -0.937        | 0.536 | 0.392        | 0.137 | 1.121    | 0.081   |
| 10    | agegroupT2 70-79    | -1.021        | 0.584 | 0.36         | 0.115 | 1.132    | 0.08    |
| 11    | agegroupT2 80+      | -1.298        | 0.598 | 0.273        | 0.085 | 0.882    | 0.03    |
| 12    | BB.stfup Yes        | -0.433        | 0.365 | 0.648        | 0.317 | 1.325    | 0.235   |
| 13    | useBB Yes           | -0.041        | 0.096 | 0.96         | 0.795 | 1.16     | 0.672   |
| 14    | A10A.stfup Yes      | 0.373         | 0.603 | 1.452        | 0.445 | 4.734    | 0.536   |
| 15    | useA10A Yes         | 0.48          | 0.142 | 1.616        | 1.224 | 2.133    | <0.001  |
| 16    | hosph.stfup Yes     | -0.43         | 0.257 | 0.65         | 0.393 | 1.075    | 0.093   |
| 17    | Switch YES          | 0.013         | 0.185 | 1.014        | 0.705 | 1.457    | 0.942   |
| 18    | calyear2 06         | 0.172         | 0.421 | 1.188        | 0.52  | 2.714    | 0.682   |
| 19    | calyear2 07         | 0.764         | 1.645 | 2.148        | 0.085 | 53.953   | 0.642   |
| 20    | calyear2 08         | 1.398         | 2.098 | 4.049        | 0.066 | 247.194  | 0.505   |
| 21    | calyear2 09         | 1.214         | 1.916 | 3.368        | 0.079 | 144.043  | 0.526   |
| 22    | time2diag 1-2       | 0.412         | 0.388 | 1.51         | 0.705 | 3.232    | 0.289   |
| 23    | time2diag 2-5       | 0.268         | 0.463 | 1.307        | 0.527 | 3.241    | 0.563   |
| 24    | time2diag 5-10      | 0.568         | 0.489 | 1.765        | 0.677 | 4.604    | 0.245   |
| 25    | time2diag 10-       | 1.735         | 0.977 | 5.667        | 0.835 | 38.481   | 0.076   |
| 26    | Pdet                | -5.519        | 3.153 | 0.004        | 0     | 1.935    | 0.08    |
| 27    | Pgla                | -2.069        | 4.781 | 0.126        | 0     | 1484.124 | 0.665   |

Naive T2 cohort. Data 28th December 2011

Table E.49: The risk for recurrence of severe hypoglycemic events estimated by the Cox's proportional hazards model. Hospital district as strata. Glargine insulin as reference. Data before 2006 censored

| S.No. | Variables        | parameter est | std   | Hazard ratio | lower | upper | P-value |
|-------|------------------|---------------|-------|--------------|-------|-------|---------|
| 1     | insulin detemir  | 0.178         | 0.265 | 1.194        | 0.71  | 2.008 | 0.503   |
| 2     | insulin NPH      | 0.152         | 0.202 | 1.164        | 0.783 | 1.731 | 0.453   |
| 3     | insulin no DGN   | -0.268        | 0.265 | 0.765        | 0.455 | 1.285 | 0.311   |
| 4     | gender Female    | 0.137         | 0.174 | 1.146        | 0.815 | 1.613 | 0.433   |
| 5     | agegroupT2 30-39 | -2.941        | 1.093 | 0.053        | 0.006 | 0.45  | 0.007   |
| 6     | agegroupT2 40-49 | -1.101        | 0.605 | 0.333        | 0.102 | 1.09  | 0.069   |
| 7     | agegroupT2 50-59 | -1.584        | 0.642 | 0.205        | 0.058 | 0.723 | 0.014   |
| 8     | agegroupT2 60-69 | -1.494        | 0.648 | 0.225        | 0.063 | 0.8   | 0.021   |
| 9     | agegroupT2 70-79 | -1.727        | 0.654 | 0.178        | 0.049 | 0.64  | 0.008   |
| 10    | agegroupT2 80+   | -2.284        | 0.695 | 0.102        | 0.026 | 0.398 | 0.001   |
| 11    | BB.stfup Yes     | 0.441         | 0.284 | 1.554        | 0.891 | 2.711 | 0.12    |
| 12    | useBB Yes        | -0.211        | 0.224 | 0.81         | 0.522 | 1.257 | 0.347   |
| 13    | A10A.stfup Yes   | -0.103        | 0.318 | 0.902        | 0.484 | 1.682 | 0.745   |
| 14    | useA10A Yes      | 0.498         | 0.214 | 1.645        | 1.082 | 2.501 | 0.02    |
| 15    | hosph.stfup Yes  | -0.394        | 0.205 | 0.675        | 0.451 | 1.009 | 0.055   |
| 16    | Switch YES       | -0.311        | 0.292 | 0.733        | 0.414 | 1.298 | 0.287   |
| 17    | time2diag 1-2    | 0.128         | 0.414 | 1.136        | 0.504 | 2.56  | 0.758   |
| 18    | time2diag 2-5    | -0.345        | 0.324 | 0.708        | 0.375 | 1.336 | 0.287   |
| 19    | time2diag 5-10   | -0.482        | 0.349 | 0.618        | 0.312 | 1.224 | 0.167   |
| 20    | time2diag 10-    | -0.47         | 0.361 | 0.625        | 0.308 | 1.27  | 0.194   |
| 21    | calyear3 07      | -0.23         | 0.236 | 0.794        | 0.5   | 1.261 | 0.329   |
| 22    | calyear3 08      | -0.591        | 0.242 | 0.554        | 0.345 | 0.89  | 0.015   |
| 23    | calyear3 09      | -0.969        | 0.475 | 0.379        | 0.15  | 0.962 | 0.041   |

Naive T2 cohort. Data 28th December 2011

Table E.50: The risk for recurrence of severe hypoglycemic events estimated by the Cox's proportional hazards model. Hospital district as strata. NPH insulin as reference. Data before 2006 censored

| S.No. | Variables           | parameter est | std   | Hazard ratio | lower | upper | P-value |
|-------|---------------------|---------------|-------|--------------|-------|-------|---------|
| 1     | insulinNPH detemir  | 0.026         | 0.277 | 1.026        | 0.596 | 1.767 | 0.926   |
| 2     | insulinNPH glargine | -0.152        | 0.202 | 0.859        | 0.578 | 1.277 | 0.453   |
| 3     | insulinNPH no DGN   | -0.42         | 0.25  | 0.657        | 0.402 | 1.074 | 0.094   |
| 4     | gender Female       | 0.137         | 0.174 | 1.146        | 0.815 | 1.613 | 0.433   |
| 5     | agegroupT2 30-39    | -2.941        | 1.093 | 0.053        | 0.006 | 0.45  | 0.007   |
| 6     | agegroupT2 40-49    | -1.101        | 0.605 | 0.333        | 0.102 | 1.09  | 0.069   |
| 7     | agegroupT2 50-59    | -1.584        | 0.642 | 0.205        | 0.058 | 0.723 | 0.014   |
| 8     | agegroupT2 60-69    | -1.494        | 0.648 | 0.225        | 0.063 | 0.8   | 0.021   |
| 9     | agegroupT2 70-79    | -1.727        | 0.654 | 0.178        | 0.049 | 0.64  | 0.008   |
| 10    | agegroupT2 80+      | -2.284        | 0.695 | 0.102        | 0.026 | 0.398 | 0.001   |
| 11    | BB.stfup Yes        | 0.441         | 0.284 | 1.554        | 0.891 | 2.711 | 0.12    |
| 12    | useBB Yes           | -0.211        | 0.224 | 0.81         | 0.522 | 1.257 | 0.347   |
| 13    | A10A.stfup Yes      | -0.103        | 0.318 | 0.902        | 0.484 | 1.682 | 0.745   |
| 14    | useA10A Yes         | 0.498         | 0.214 | 1.645        | 1.082 | 2.501 | 0.02    |
| 15    | hosph.stfup Yes     | -0.394        | 0.205 | 0.675        | 0.451 | 1.009 | 0.055   |
| 16    | Switch YES          | -0.311        | 0.292 | 0.733        | 0.414 | 1.298 | 0.287   |
| 17    | time2diag 1-2       | 0.128         | 0.414 | 1.136        | 0.504 | 2.56  | 0.758   |
| 18    | time2diag 2-5       | -0.345        | 0.324 | 0.708        | 0.375 | 1.336 | 0.287   |
| 19    | time2diag 5-10      | -0.482        | 0.349 | 0.618        | 0.312 | 1.224 | 0.167   |
| 20    | time2diag 10-       | -0.47         | 0.361 | 0.625        | 0.308 | 1.27  | 0.194   |
| 21    | calyear3 07         | -0.23         | 0.236 | 0.794        | 0.5   | 1.261 | 0.329   |
| 22    | calyear3 08         | -0.591        | 0.242 | 0.554        | 0.345 | 0.89  | 0.015   |
| 23    | calyear3 09         | -0.969        | 0.475 | 0.379        | 0.15  | 0.962 | 0.041   |

Naive T2 cohort. Data 28th December 2011

### E.3 All hypoglycemic coma events

Table E.51: The risk for all hypoglycemic coma events estimated by the Cox's proportional hazards model. Hospital district as strata. Gargine insulin as reference

| S.No. | Variables        | parameter est | std   | Hazard ratio | lower | upper | P-value |
|-------|------------------|---------------|-------|--------------|-------|-------|---------|
| 1     | insulin detemir  | -0.309        | 0.121 | 0.734        | 0.579 | 0.931 | 0.011   |
| 2     | insulin NPH      | 0.158         | 0.08  | 1.171        | 1.001 | 1.37  | 0.049   |
| 3     | insulin no DGN   | -0.029        | 0.079 | 0.972        | 0.833 | 1.134 | 0.716   |
| 4     | gender Female    | -0.146        | 0.064 | 0.864        | 0.763 | 0.979 | 0.021   |
| 5     | agegroupT2 0-19  | 0.069         | 0.5   | 1.072        | 0.402 | 2.855 | 0.89    |
| 6     | agegroupT2 30-39 | 0.111         | 0.597 | 1.118        | 0.347 | 3.602 | 0.852   |
| 7     | agegroupT2 40-49 | 0.064         | 0.384 | 1.066        | 0.502 | 2.262 | 0.868   |
| 8     | agegroupT2 50-59 | -0.298        | 0.372 | 0.742        | 0.358 | 1.538 | 0.423   |
| 9     | agegroupT2 60-69 | -0.119        | 0.376 | 0.888        | 0.425 | 1.855 | 0.752   |
| 10    | agegroupT2 70-79 | -0.007        | 0.372 | 0.993        | 0.48  | 2.058 | 0.986   |
| 11    | agegroupT2 80+   | 0.048         | 0.374 | 1.049        | 0.504 | 2.183 | 0.897   |
| 12    | BB.stfup Yes     | -0.172        | 0.267 | 0.842        | 0.499 | 1.419 | 0.518   |
| 13    | useBB Yes        | -0.015        | 0.051 | 0.985        | 0.891 | 1.089 | 0.766   |
| 14    | A10A.stfup Yes   | 0.117         | 0.232 | 1.124        | 0.713 | 1.771 | 0.615   |
| 15    | useA10A Yes      | 0.598         | 0.098 | 1.818        | 1.501 | 2.202 | <0.001  |
| 16    | hosph.stfup Yes  | 1.453         | 0.104 | 4.276        | 3.486 | 5.244 | <0.001  |
| 17    | Switch YES       | 0.188         | 0.125 | 1.206        | 0.945 | 1.541 | 0.133   |
| 18    | time2diag 1-2    | 0.176         | 0.215 | 1.193        | 0.783 | 1.818 | 0.412   |
| 19    | time2diag 2-5    | -0.003        | 0.249 | 0.997        | 0.613 | 1.624 | 0.991   |
| 20    | time2diag 5-10   | 0.145         | 0.288 | 1.156        | 0.658 | 2.033 | 0.614   |
| 21    | time2diag 10-    | 0.637         | 0.665 | 1.891        | 0.514 | 6.957 | 0.338   |
| 22    | calyear2 06      | -0.339        | 0.149 | 0.713        | 0.532 | 0.954 | 0.023   |
| 23    | calyear2 07      | -0.478        | 0.169 | 0.62         | 0.445 | 0.864 | 0.005   |
| 24    | calyear2 08      | -0.546        | 0.158 | 0.579        | 0.425 | 0.79  | <0.001  |
| 25    | calyear2 09      | -0.901        | 0.201 | 0.406        | 0.274 | 0.602 | <0.001  |

Naive T2 cohort. Data 28th December 2011

Table E.52: The risk for all hypoglycemic coma events estimated by the Cox's proportional hazards model. Hospital district as strata. NPH insulin as reference

| S.No. | Variables           | parameter est | std   | Hazard ratio | lower | upper | P-value |
|-------|---------------------|---------------|-------|--------------|-------|-------|---------|
| 1     | insulinNPH detemir  | -0.467        | 0.144 | 0.627        | 0.473 | 0.831 | 0.001   |
| 2     | insulinNPH glargine | -0.158        | 0.08  | 0.854        | 0.73  | 0.999 | 0.049   |
| 3     | insulinNPH no DGN   | -0.186        | 0.066 | 0.83         | 0.73  | 0.944 | 0.004   |
| 4     | gender Female       | -0.146        | 0.064 | 0.864        | 0.763 | 0.979 | 0.021   |
| 5     | agegroupT2 0-19     | 0.069         | 0.5   | 1.072        | 0.402 | 2.855 | 0.89    |
| 6     | agegroupT2 30-39    | 0.111         | 0.597 | 1.118        | 0.347 | 3.602 | 0.852   |
| 7     | agegroupT2 40-49    | 0.064         | 0.384 | 1.066        | 0.502 | 2.262 | 0.868   |
| 8     | agegroupT2 50-59    | -0.298        | 0.372 | 0.742        | 0.358 | 1.538 | 0.423   |
| 9     | agegroupT2 60-69    | -0.119        | 0.376 | 0.888        | 0.425 | 1.855 | 0.752   |
| 10    | agegroupT2 70-79    | -0.007        | 0.372 | 0.993        | 0.48  | 2.058 | 0.986   |
| 11    | agegroupT2 80+      | 0.048         | 0.374 | 1.049        | 0.504 | 2.183 | 0.897   |
| 12    | BB.stfup Yes        | -0.172        | 0.267 | 0.842        | 0.499 | 1.419 | 0.518   |
| 13    | useBB Yes           | -0.015        | 0.051 | 0.985        | 0.891 | 1.089 | 0.766   |
| 14    | A10A.stfup Yes      | 0.117         | 0.232 | 1.124        | 0.713 | 1.771 | 0.615   |
| 15    | useA10A Yes         | 0.598         | 0.098 | 1.818        | 1.501 | 2.202 | <0.001  |
| 16    | hosph.stfup Yes     | 1.453         | 0.104 | 4.276        | 3.486 | 5.244 | <0.001  |
| 17    | Switch YES          | 0.188         | 0.125 | 1.206        | 0.945 | 1.541 | 0.133   |
| 18    | time2diag 1-2       | 0.176         | 0.215 | 1.193        | 0.783 | 1.818 | 0.412   |
| 19    | time2diag 2-5       | -0.003        | 0.249 | 0.997        | 0.613 | 1.624 | 0.991   |
| 20    | time2diag 5-10      | 0.145         | 0.288 | 1.156        | 0.658 | 2.033 | 0.614   |
| 21    | time2diag 10-       | 0.637         | 0.665 | 1.891        | 0.514 | 6.957 | 0.338   |
| 22    | calyear2 06         | -0.339        | 0.149 | 0.713        | 0.532 | 0.954 | 0.023   |
| 23    | calyear2 07         | -0.478        | 0.169 | 0.62         | 0.445 | 0.864 | 0.005   |
| 24    | calyear2 08         | -0.546        | 0.158 | 0.579        | 0.425 | 0.79  | <0.001  |
| 25    | calyear2 09         | -0.901        | 0.201 | 0.406        | 0.274 | 0.602 | <0.001  |

Naive T2 cohort. Data 28th December 2011



## F Appendix 6: Duration of hospitalizations and secondary care visits

Table F.53: Hospitalizations and secondary care visits due to severe hypoglycemic coma events stratified by insulin at start of follow-up and by present insulin. The number of visits and the distribution of the length of the visits.

| S.No. | Variables     |          | All (N) | Days (%) |       |       |      |       |
|-------|---------------|----------|---------|----------|-------|-------|------|-------|
|       | First Insulin | Insulin  |         | N        | 0-1   | 2-3   | 4-5  | 6-7   |
| 1     | glargine      | glargine | 580     | 57.41    | 15.00 | 7.76  | 8.10 | 11.72 |
| 2     | glargine      | detemir  | 3       | 66.67    | 0.00  | 33.33 | 0.00 | 0.00  |
| 3     | glargine      | NPH      | 27      | 81.48    | 11.11 | 7.41  | 0.00 | 0.00  |
| 4     | glargine      | no DGN   | 67      | 59.70    | 13.43 | 11.94 | 4.48 | 10.45 |
| 5     | detemir       | glargine | 1       | 100.00   | 0.00  | 0.00  | 0.00 | 0.00  |
| 6     | detemir       | detemir  | 109     | 45.87    | 17.43 | 17.43 | 6.42 | 12.84 |
| 7     | detemir       | NPH      | 4       | 100.00   | 0.00  | 0.00  | 0.00 | 0.00  |
| 8     | detemir       | no DGN   | 5       | 60.00    | 20.00 | 0.00  | 0.00 | 20.00 |
| 9     | NPH           | glargine | 548     | 65.88    | 10.77 | 8.03  | 5.11 | 10.22 |
| 10    | NPH           | detemir  | 105     | 64.76    | 14.29 | 8.57  | 4.76 | 7.62  |
| 11    | NPH           | NPH      | 3283    | 60.77    | 12.31 | 8.99  | 6.46 | 11.48 |
| 12    | NPH           | no DGN   | 745     | 52.35    | 13.96 | 9.53  | 8.19 | 15.97 |
| 13    | Total         | glargine | 1129    | 61.56    | 12.93 | 7.88  | 6.64 | 10.98 |
| 14    | Total         | detemir  | 217     | 55.30    | 15.67 | 13.36 | 5.53 | 10.14 |
| 15    | Total         | NPH      | 3314    | 60.98    | 12.28 | 8.96  | 6.40 | 11.38 |
| 16    | Total         | no DGN   | 817     | 53.00    | 13.95 | 9.67  | 7.83 | 15.54 |

Naive T2 cohort. Data 28th December 2011



Table F.54: Hospitalizations and secondary care visits due to severe hypoglycemic coma events stratified by insulin at start of follow-up and by present insulin. The number of visits and the distribution of visit length (Days) described by the minimum, the 25% quantile, the median, the mean, the 75% quantile and the maximum.

| S.No. | Variables     |          | All (N) | Duration (Days) |     |     |        |      |     |
|-------|---------------|----------|---------|-----------------|-----|-----|--------|------|-----|
|       | First Insulin | Insulin  |         | N               | Min | 25% | Median | Mean | 75% |
| 1     | glargine      | glargine | 580     | 1               | 1   | 1   | 3.650  | 4.0  | 110 |
| 2     | glargine      | detemir  | 3       | 1               | 1   | 1   | 2.000  | 2.5  | 4   |
| 3     | glargine      | NPH      | 27      | 1               | 1   | 1   | 1.444  | 1.0  | 5   |
| 4     | glargine      | no DGN   | 67      | 1               | 1   | 1   | 4.896  | 4.0  | 102 |
| 5     | detemir       | glargine | 1       | 1               | 1   | 1   | 1.000  | 1.0  | 1   |
| 6     | detemir       | detemir  | 109     | 1               | 1   | 2   | 4.119  | 5.0  | 38  |
| 7     | detemir       | NPH      | 4       | 1               | 1   | 1   | 1.000  | 1.0  | 1   |
| 8     | detemir       | no DGN   | 5       | 1               | 1   | 1   | 2.800  | 2.0  | 9   |
| 9     | NPH           | glargine | 548     | 1               | 1   | 1   | 3.199  | 3.0  | 56  |
| 10    | NPH           | detemir  | 105     | 1               | 1   | 1   | 3.067  | 3.0  | 51  |
| 11    | NPH           | NPH      | 3283    | 1               | 1   | 1   | 3.631  | 4.0  | 486 |
| 12    | NPH           | no DGN   | 745     | 1               | 1   | 1   | 4.620  | 5.0  | 176 |
| 13    | Total         | glargine | 1129    | 1               | 1   | 1   | 3.429  | 4.0  | 110 |
| 14    | Total         | detemir  | 217     | 1               | 1   | 1   | 3.581  | 4.0  | 51  |
| 15    | Total         | NPH      | 3314    | 1               | 1   | 1   | 3.610  | 4.0  | 486 |
| 16    | Total         | no DGN   | 817     | 1               | 1   | 1   | 4.632  | 5.0  | 176 |

Naive T2 cohort. Data 28th December 2011

Table F.55: Hospitalizations and secondary care visits due to severe hypoglycemic coma events stratified by reimbursement diagnose and by insulin. The number of visits and the distribution of the length of the visits.

| S.No. | Variables |          | All (N) | Days (%) |       |       |      |       |
|-------|-----------|----------|---------|----------|-------|-------|------|-------|
|       | Diagnose  | Insulin  |         | N        | 0-1   | 2-3   | 4-5  | 6-7   |
| 1     | T1        | glargine | 1129    | 61.56    | 12.93 | 7.88  | 6.64 | 10.98 |
| 2     | T1        | detemir  | 217     | 55.30    | 15.67 | 13.36 | 5.53 | 10.14 |
| 3     | T1        | NPH      | 3314    | 60.98    | 12.28 | 8.96  | 6.40 | 11.38 |
| 4     | T1        | no DGN   | 817     | 53.00    | 13.95 | 9.67  | 7.83 | 15.54 |
| 5     | T2        | glargine | 0       | NaN      | NaN   | NaN   | NaN  | NaN   |
| 6     | T2        | detemir  | 0       | NaN      | NaN   | NaN   | NaN  | NaN   |
| 7     | T2        | NPH      | 0       | NaN      | NaN   | NaN   | NaN  | NaN   |
| 8     | T2        | no DGN   | 0       | NaN      | NaN   | NaN   | NaN  | NaN   |
| 9     | Undefined | glargine | 0       | NaN      | NaN   | NaN   | NaN  | NaN   |
| 10    | Undefined | detemir  | 0       | NaN      | NaN   | NaN   | NaN  | NaN   |
| 11    | Undefined | NPH      | 0       | NaN      | NaN   | NaN   | NaN  | NaN   |
| 12    | Undefined | no DGN   | 0       | NaN      | NaN   | NaN   | NaN  | NaN   |
| 13    | Total     | glargine | 1129    | 61.56    | 12.93 | 7.88  | 6.64 | 10.98 |
| 14    | Total     | detemir  | 217     | 55.30    | 15.67 | 13.36 | 5.53 | 10.14 |
| 15    | Total     | NPH      | 3314    | 60.98    | 12.28 | 8.96  | 6.40 | 11.38 |
| 16    | Total     | no DGN   | 817     | 53.00    | 13.95 | 9.67  | 7.83 | 15.54 |

Naive T2 cohort. Data 28th December 2011

Table F.56: Hospitalizations and secondary care visits due to severe hypoglycemic coma events stratified by reimbursement diagnose and by insulin. The number of visits and the distribution of visit length (Days) described by the minimum, the 25% quantile, the median, the mean, the 75% quantile and the maximum.

| S.No. | Variables |          | All (N) | Duration (Days) |     |     |        |      |     |
|-------|-----------|----------|---------|-----------------|-----|-----|--------|------|-----|
|       | Diagnose  | Insulin  |         | N               | Min | 25% | Median | Mean | 75% |
| 1     | T1        | glargine | 1129    | 1               | 1   | 1   | 3.429  | 4    | 110 |
| 2     | T1        | detemir  | 217     | 1               | 1   | 1   | 3.581  | 4    | 51  |
| 3     | T1        | NPH      | 3314    | 1               | 1   | 1   | 3.610  | 4    | 486 |
| 4     | T1        | no DGN   | 817     | 1               | 1   | 1   | 4.632  | 5    | 176 |
| 5     | T2        | glargine | 0       | NA              | NA  | NA  | NaN    | NA   | NA  |
| 6     | T2        | detemir  | 0       | NA              | NA  | NA  | NaN    | NA   | NA  |
| 7     | T2        | NPH      | 0       | NA              | NA  | NA  | NaN    | NA   | NA  |
| 8     | T2        | no DGN   | 0       | NA              | NA  | NA  | NaN    | NA   | NA  |
| 9     | Undefined | glargine | 0       | NA              | NA  | NA  | NaN    | NA   | NA  |
| 10    | Undefined | detemir  | 0       | NA              | NA  | NA  | NaN    | NA   | NA  |
| 11    | Undefined | NPH      | 0       | NA              | NA  | NA  | NaN    | NA   | NA  |
| 12    | Undefined | no DGN   | 0       | NA              | NA  | NA  | NaN    | NA   | NA  |
| 13    | Total     | glargine | 1129    | 1               | 1   | 1   | 3.429  | 4    | 110 |
| 14    | Total     | detemir  | 217     | 1               | 1   | 1   | 3.581  | 4    | 51  |
| 15    | Total     | NPH      | 3314    | 1               | 1   | 1   | 3.610  | 4    | 486 |
| 16    | Total     | no DGN   | 817     | 1               | 1   | 1   | 4.632  | 5    | 176 |

Naive T2 cohort. Data 28th December 2011

Table F.57: Hospitalizations and secondary care visits due to severe hypoglycemic coma events stratified by gender and by insulin. The number of visits and the distribution of the length of the visits.

| S.No. | Variables |          | All (N) | Days (%) |       |       |      |       |
|-------|-----------|----------|---------|----------|-------|-------|------|-------|
|       | Gender    | Insulin  |         | 0-1      | 2-3   | 4-5   | 6-7  | 7-    |
| 1     | Male      | glargine | 722     | 65.65    | 10.94 | 7.34  | 5.40 | 10.66 |
| 2     | Male      | detemir  | 108     | 52.78    | 18.52 | 12.96 | 6.48 | 9.26  |
| 3     | Male      | NPH      | 1978    | 63.75    | 12.69 | 8.29  | 5.21 | 10.06 |
| 4     | Male      | no DGN   | 420     | 52.62    | 13.10 | 10.24 | 9.05 | 15.00 |
| 5     | Female    | glargine | 407     | 54.30    | 16.46 | 8.85  | 8.85 | 11.55 |
| 6     | Female    | detemir  | 109     | 57.80    | 12.84 | 13.76 | 4.59 | 11.01 |
| 7     | Female    | NPH      | 1336    | 56.89    | 11.68 | 9.96  | 8.16 | 13.32 |
| 8     | Female    | no DGN   | 397     | 53.40    | 14.86 | 9.07  | 6.55 | 16.12 |
| 9     | Total     | glargine | 1129    | 61.56    | 12.93 | 7.88  | 6.64 | 10.98 |
| 10    | Total     | detemir  | 217     | 55.30    | 15.67 | 13.36 | 5.53 | 10.14 |
| 11    | Total     | NPH      | 3314    | 60.98    | 12.28 | 8.96  | 6.40 | 11.38 |
| 12    | Total     | no DGN   | 817     | 53.00    | 13.95 | 9.67  | 7.83 | 15.54 |

Naive T2 cohort. Data 28th December 2011

Table F.58: Hospitalizations and secondary care visits due to severe hypoglycemic coma events stratified by gender and by insulin. The number of visits and the distribution of visit length (Days) described by the minimum, the 25% quantile, the median, the mean, the 75% quantile and the maximum.

| S.No. | Variables |          | All (N) | Duration (Days) |     |     |        |      |     |
|-------|-----------|----------|---------|-----------------|-----|-----|--------|------|-----|
|       | Gender    | Insulin  |         | N               | Min | 25% | Median | Mean | 75% |
| 1     | Male      | glargine | 722     | 1               | 1   | 1   | 3.266  | 3    | 110 |
| 2     | Male      | detemir  | 108     | 1               | 1   | 1   | 3.648  | 4    | 38  |
| 3     | Male      | NPH      | 1978    | 1               | 1   | 1   | 3.371  | 3    | 486 |
| 4     | Male      | no DGN   | 420     | 1               | 1   | 1   | 4.831  | 5    | 176 |
| 5     | Female    | glargine | 407     | 1               | 1   | 1   | 3.717  | 4    | 79  |
| 6     | Female    | detemir  | 109     | 1               | 1   | 1   | 3.514  | 4    | 51  |
| 7     | Female    | NPH      | 1336    | 1               | 1   | 1   | 3.965  | 5    | 134 |
| 8     | Female    | no DGN   | 397     | 1               | 1   | 1   | 4.421  | 5    | 102 |
| 9     | Total     | glargine | 1129    | 1               | 1   | 1   | 3.429  | 4    | 110 |
| 10    | Total     | detemir  | 217     | 1               | 1   | 1   | 3.581  | 4    | 51  |
| 11    | Total     | NPH      | 3314    | 1               | 1   | 1   | 3.610  | 4    | 486 |
| 12    | Total     | no DGN   | 817     | 1               | 1   | 1   | 4.632  | 5    | 176 |

Naive T2 cohort. Data 28th December 2011

Table F.59: Hospitalizations and secondary care visits due to severe hypoglycemic coma events stratified by age at start of follow-up and by insulin. The number of visits and the distribution of the length of the visits.

| S.No. | Variables |          | All (N) | Days (%) |       |       |       |       |
|-------|-----------|----------|---------|----------|-------|-------|-------|-------|
|       | Age group | Insulin  |         | N        | 0-1   | 2-3   | 4-5   | 6-7   |
| 1     | 0-9       | glargine | 0       | NaN      | NaN   | NaN   | NaN   | NaN   |
| 2     | 0-9       | detemir  | 0       | NaN      | NaN   | NaN   | NaN   | NaN   |
| 3     | 0-9       | NPH      | 1       | 100.00   | 0.00  | 0.00  | 0.00  | 0.00  |
| 4     | 0-9       | no DGN   | 1       | 100.00   | 0.00  | 0.00  | 0.00  | 0.00  |
| 5     | 10-19     | glargine | 18      | 94.44    | 5.56  | 0.00  | 0.00  | 0.00  |
| 6     | 10-19     | detemir  | 1       | 100.00   | 0.00  | 0.00  | 0.00  | 0.00  |
| 7     | 10-19     | NPH      | 15      | 93.33    | 6.67  | 0.00  | 0.00  | 0.00  |
| 8     | 10-19     | no DGN   | 7       | 85.71    | 14.29 | 0.00  | 0.00  | 0.00  |
| 9     | 20-29     | glargine | 5       | 60.00    | 20.00 | 20.00 | 0.00  | 0.00  |
| 10    | 20-29     | detemir  | 6       | 100.00   | 0.00  | 0.00  | 0.00  | 0.00  |
| 11    | 20-29     | NPH      | 32      | 90.62    | 6.25  | 0.00  | 0.00  | 3.12  |
| 12    | 20-29     | no DGN   | 21      | 76.19    | 9.52  | 9.52  | 0.00  | 4.76  |
| 13    | 30-39     | glargine | 110     | 93.64    | 1.82  | 0.91  | 1.82  | 1.82  |
| 14    | 30-39     | detemir  | 10      | 80.00    | 10.00 | 0.00  | 10.00 | 0.00  |
| 15    | 30-39     | NPH      | 143     | 81.82    | 6.99  | 3.50  | 2.10  | 5.59  |
| 16    | 30-39     | no DGN   | 32      | 81.25    | 6.25  | 3.12  | 0.00  | 9.38  |
| 17    | 40-49     | glargine | 150     | 71.33    | 9.33  | 4.67  | 2.67  | 12.00 |
| 18    | 40-49     | detemir  | 33      | 75.76    | 3.03  | 6.06  | 9.09  | 6.06  |
| 19    | 40-49     | NPH      | 453     | 80.13    | 6.40  | 4.19  | 4.19  | 5.08  |
| 20    | 40-49     | no DGN   | 103     | 60.19    | 8.74  | 10.68 | 8.74  | 11.65 |
| 21    | 50-59     | glargine | 279     | 66.67    | 13.26 | 8.96  | 3.58  | 7.53  |
| 22    | 50-59     | detemir  | 60      | 60.00    | 20.00 | 11.67 | 1.67  | 6.67  |
| 23    | 50-59     | NPH      | 726     | 62.81    | 13.77 | 8.82  | 4.96  | 9.64  |
| 24    | 50-59     | no DGN   | 210     | 56.19    | 12.86 | 8.10  | 7.62  | 15.24 |
| 25    | 60-69     | glargine | 261     | 56.32    | 10.73 | 8.43  | 11.88 | 12.64 |
| 26    | 60-69     | detemir  | 47      | 57.45    | 10.64 | 12.77 | 4.26  | 14.89 |
| 27    | 60-69     | NPH      | 934     | 62.63    | 12.21 | 7.82  | 6.53  | 10.81 |
| 28    | 60-69     | no DGN   | 194     | 51.55    | 14.95 | 11.34 | 7.73  | 14.43 |
| 29    | 70-79     | glargine | 201     | 45.77    | 19.90 | 8.46  | 8.96  | 16.92 |
| 30    | 70-79     | detemir  | 43      | 34.88    | 27.91 | 16.28 | 6.98  | 13.95 |
| 31    | 70-79     | NPH      | 731     | 45.83    | 15.87 | 13.13 | 8.89  | 16.28 |
| 32    | 70-79     | no DGN   | 171     | 45.03    | 15.79 | 9.94  | 9.36  | 19.88 |
| 33    | 80+       | glargine | 105     | 38.10    | 21.90 | 15.24 | 9.52  | 15.24 |
| 34    | 80+       | detemir  | 17      | 11.76    | 17.65 | 41.18 | 11.76 | 17.65 |
| 35    | 80+       | NPH      | 279     | 43.37    | 12.54 | 14.34 | 10.04 | 19.71 |
| 36    | 80+       | no DGN   | 78      | 34.62    | 21.79 | 11.54 | 10.26 | 21.79 |
| 37    | Total     | glargine | 1129    | 61.56    | 12.93 | 7.88  | 6.64  | 10.98 |
| 38    | Total     | detemir  | 217     | 55.30    | 15.67 | 13.36 | 5.53  | 10.14 |
| 39    | Total     | NPH      | 3314    | 60.98    | 12.28 | 8.96  | 6.40  | 11.38 |
| 40    | Total     | no DGN   | 817     | 53.00    | 13.95 | 9.67  | 7.83  | 15.54 |

Naive T2 cohort. Data 28th December 2011

Table F.60: Hospitalizations and secondary care visits due to severe hypoglycemic coma events stratified by age at start of follow-up and by insulin. The number of visits and the distribution of visit length (Days) described by the minimum, the 25% quantile, the median, the mean, the 75% quantile and the maximum.

| S.No. | Variables |          | All (N) | Duration (Days) |     |        |       |      |     |
|-------|-----------|----------|---------|-----------------|-----|--------|-------|------|-----|
|       | Age group | Insulin  |         | Min             | 25% | Median | Mean  | 75%  | Max |
| 1     | 0-9       | glargine | 0       | NA              | NA  | NA     | NaN   | NA   | NA  |
| 2     | 0-9       | detemir  | 0       | NA              | NA  | NA     | NaN   | NA   | NA  |
| 3     | 0-9       | NPH      | 1       | 1               | 1   | 1      | 1.000 | 1.00 | 1   |
| 4     | 0-9       | no DGN   | 1       | 1               | 1   | 1      | 1.000 | 1.00 | 1   |
| 5     | 10-19     | glargine | 18      | 1               | 1   | 1      | 1.056 | 1.00 | 2   |
| 6     | 10-19     | detemir  | 1       | 1               | 1   | 1      | 1.000 | 1.00 | 1   |
| 7     | 10-19     | NPH      | 15      | 1               | 1   | 1      | 1.067 | 1.00 | 2   |
| 8     | 10-19     | no DGN   | 7       | 1               | 1   | 1      | 1.143 | 1.00 | 2   |
| 9     | 20-29     | glargine | 5       | 1               | 1   | 1      | 1.800 | 2.00 | 4   |
| 10    | 20-29     | detemir  | 6       | 1               | 1   | 1      | 1.000 | 1.00 | 1   |
| 11    | 20-29     | NPH      | 32      | 1               | 1   | 1      | 1.344 | 1.00 | 9   |
| 12    | 20-29     | no DGN   | 21      | 1               | 1   | 1      | 2.476 | 1.00 | 21  |
| 13    | 30-39     | glargine | 110     | 1               | 1   | 1      | 1.755 | 1.00 | 52  |
| 14    | 30-39     | detemir  | 10      | 1               | 1   | 1      | 1.800 | 1.00 | 7   |
| 15    | 30-39     | NPH      | 143     | 1               | 1   | 1      | 2.259 | 1.00 | 37  |
| 16    | 30-39     | no DGN   | 32      | 1               | 1   | 1      | 5.531 | 1.00 | 102 |
| 17    | 40-49     | glargine | 150     | 1               | 1   | 1      | 3.240 | 2.00 | 56  |
| 18    | 40-49     | detemir  | 33      | 1               | 1   | 1      | 3.182 | 1.00 | 38  |
| 19    | 40-49     | NPH      | 453     | 1               | 1   | 1      | 2.146 | 1.00 | 32  |
| 20    | 40-49     | no DGN   | 103     | 1               | 1   | 1      | 3.806 | 4.00 | 50  |
| 21    | 50-59     | glargine | 279     | 1               | 1   | 1      | 2.602 | 3.00 | 49  |
| 22    | 50-59     | detemir  | 60      | 1               | 1   | 1      | 2.400 | 2.00 | 17  |
| 23    | 50-59     | NPH      | 726     | 1               | 1   | 1      | 3.811 | 3.00 | 486 |
| 24    | 50-59     | no DGN   | 210     | 1               | 1   | 1      | 5.110 | 5.00 | 176 |
| 25    | 60-69     | glargine | 261     | 1               | 1   | 1      | 4.364 | 5.00 | 99  |
| 26    | 60-69     | detemir  | 47      | 1               | 1   | 1      | 4.149 | 4.50 | 35  |
| 27    | 60-69     | NPH      | 934     | 1               | 1   | 1      | 3.588 | 4.00 | 113 |
| 28    | 60-69     | no DGN   | 194     | 1               | 1   | 1      | 4.438 | 5.00 | 86  |
| 29    | 70-79     | glargine | 201     | 1               | 1   | 2      | 4.478 | 6.00 | 110 |
| 30    | 70-79     | detemir  | 43      | 1               | 1   | 2      | 4.186 | 4.50 | 31  |
| 31    | 70-79     | NPH      | 731     | 1               | 1   | 2      | 4.286 | 6.00 | 95  |
| 32    | 70-79     | no DGN   | 171     | 1               | 1   | 2      | 4.965 | 6.00 | 55  |
| 33    | 80+       | glargine | 105     | 1               | 1   | 3      | 3.800 | 5.00 | 15  |
| 34    | 80+       | detemir  | 17      | 1               | 2   | 4      | 7.529 | 6.00 | 51  |
| 35    | 80+       | NPH      | 279     | 1               | 1   | 3      | 4.867 | 6.00 | 67  |
| 36    | 80+       | no DGN   | 78      | 1               | 1   | 2      | 4.756 | 6.75 | 29  |
| 37    | Total     | glargine | 1129    | 1               | 1   | 1      | 3.429 | 4.00 | 110 |
| 38    | Total     | detemir  | 217     | 1               | 1   | 1      | 3.581 | 4.00 | 51  |
| 39    | Total     | NPH      | 3314    | 1               | 1   | 1      | 3.610 | 4.00 | 486 |
| 40    | Total     | no DGN   | 817     | 1               | 1   | 1      | 4.632 | 5.00 | 176 |

Naive T2 cohort. Data 28th December 2011

Table F.61: Hospitalizations and secondary care visits due to severe hypoglycemic coma events stratified by calendar year at start of follow-up and by insulin. The number of visits and the distribution of the length of the visits.

| S.No. | Variables     |          | All (N) | Days (%) |       |       |       |       |
|-------|---------------|----------|---------|----------|-------|-------|-------|-------|
|       | Calender year | Insulin  |         | N        | 0-1   | 2-3   | 4-5   | 6-7   |
| 1     | 00-05         | glargine | 716     | 64.53    | 11.31 | 7.54  | 6.15  | 10.47 |
| 2     | 00-05         | detemir  | 72      | 68.06    | 15.28 | 5.56  | 4.17  | 6.94  |
| 3     | 00-05         | NPH      | 2874    | 60.75    | 12.35 | 9.05  | 5.95  | 11.90 |
| 4     | 00-05         | no DGN   | 698     | 51.86    | 14.18 | 10.46 | 7.88  | 15.62 |
| 5     | 06            | glargine | 75      | 58.67    | 10.67 | 13.33 | 5.33  | 12.00 |
| 6     | 06            | detemir  | 24      | 66.67    | 8.33  | 16.67 | 4.17  | 4.17  |
| 7     | 06            | NPH      | 251     | 62.95    | 10.76 | 9.96  | 9.96  | 6.37  |
| 8     | 06            | no DGN   | 62      | 61.29    | 6.45  | 6.45  | 6.45  | 19.35 |
| 9     | 07            | glargine | 174     | 58.05    | 17.24 | 6.90  | 8.05  | 9.77  |
| 10    | 07            | detemir  | 42      | 35.71    | 26.19 | 14.29 | 9.52  | 14.29 |
| 11    | 07            | NPH      | 117     | 64.96    | 12.82 | 8.55  | 5.98  | 7.69  |
| 12    | 07            | no DGN   | 46      | 60.87    | 19.57 | 2.17  | 6.52  | 10.87 |
| 13    | 08            | glargine | 131     | 54.20    | 18.32 | 8.40  | 6.11  | 12.98 |
| 14    | 08            | detemir  | 57      | 52.63    | 14.04 | 15.79 | 5.26  | 12.28 |
| 15    | 08            | NPH      | 56      | 53.57    | 17.86 | 1.79  | 12.50 | 14.29 |
| 16    | 08            | no DGN   | 8       | 62.50    | 12.50 | 0.00  | 25.00 | 0.00  |
| 17    | 09            | glargine | 33      | 51.52    | 9.09  | 6.06  | 15.15 | 18.18 |
| 18    | 09            | detemir  | 22      | 45.45    | 9.09  | 27.27 | 4.55  | 13.64 |
| 19    | 09            | NPH      | 16      | 68.75    | 0.00  | 6.25  | 12.50 | 12.50 |
| 20    | 09            | no DGN   | 3       | 0.00     | 33.33 | 33.33 | 0.00  | 33.33 |
| 21    | Total         | glargine | 1129    | 61.56    | 12.93 | 7.88  | 6.64  | 10.98 |
| 22    | Total         | detemir  | 217     | 55.30    | 15.67 | 13.36 | 5.53  | 10.14 |
| 23    | Total         | NPH      | 3314    | 60.98    | 12.28 | 8.96  | 6.40  | 11.38 |
| 24    | Total         | no DGN   | 817     | 53.00    | 13.95 | 9.67  | 7.83  | 15.54 |

Naive T2 cohort. Data 28th December 2011



Table F.62: Hospitalizations and secondary care visits due to severe hypoglycemic coma events stratified by calendar year at start of follow-up and by insulin. The number of visits and the distribution of visit length (Days) described by the minimum, the 25% quantile, the median, the mean, the 75% quantile and the maximum.

| S.No. | Variables     |          | All (N) | Duration (Days) |     |        |       |      |     |
|-------|---------------|----------|---------|-----------------|-----|--------|-------|------|-----|
|       | Calender year | Insulin  | N       | Min             | 25% | Median | Mean  | 75%  | Max |
| 1     | 00-05         | glargine | 716     | 1               | 1.0 | 1.0    | 3.102 | 3.00 | 56  |
| 2     | 00-05         | detemir  | 72      | 1               | 1.0 | 1.0    | 3.097 | 2.00 | 51  |
| 3     | 00-05         | NPH      | 2874    | 1               | 1.0 | 1.0    | 3.709 | 4.00 | 486 |
| 4     | 00-05         | no DGN   | 698     | 1               | 1.0 | 1.0    | 4.650 | 5.00 | 176 |
| 5     | 06            | glargine | 75      | 1               | 1.0 | 1.0    | 5.080 | 4.00 | 99  |
| 6     | 06            | detemir  | 24      | 1               | 1.0 | 1.0    | 2.208 | 3.25 | 9   |
| 7     | 06            | NPH      | 251     | 1               | 1.0 | 1.0    | 2.873 | 4.00 | 35  |
| 8     | 06            | no DGN   | 62      | 1               | 1.0 | 1.0    | 5.484 | 5.75 | 102 |
| 9     | 07            | glargine | 174     | 1               | 1.0 | 1.0    | 3.305 | 3.00 | 79  |
| 10    | 07            | detemir  | 42      | 1               | 1.0 | 2.0    | 4.333 | 5.00 | 35  |
| 11    | 07            | NPH      | 117     | 1               | 1.0 | 1.0    | 2.641 | 3.00 | 19  |
| 12    | 07            | no DGN   | 46      | 1               | 1.0 | 1.0    | 3.565 | 2.00 | 40  |
| 13    | 08            | glargine | 131     | 1               | 1.0 | 1.0    | 4.351 | 4.00 | 110 |
| 14    | 08            | detemir  | 57      | 1               | 1.0 | 1.0    | 4.088 | 4.00 | 38  |
| 15    | 08            | NPH      | 56      | 1               | 1.0 | 1.0    | 3.625 | 6.00 | 25  |
| 16    | 08            | no DGN   | 8       | 1               | 1.0 | 1.0    | 2.375 | 3.00 | 6   |
| 17    | 09            | glargine | 33      | 1               | 1.0 | 1.0    | 3.758 | 7.00 | 13  |
| 18    | 09            | detemir  | 22      | 1               | 1.0 | 2.5    | 3.909 | 5.00 | 16  |
| 19    | 09            | NPH      | 16      | 1               | 1.0 | 1.0    | 4.500 | 5.25 | 29  |
| 20    | 09            | no DGN   | 3       | 3               | 3.5 | 4.0    | 5.000 | 6.00 | 8   |
| 21    | Total         | glargine | 1129    | 1               | 1.0 | 1.0    | 3.429 | 4.00 | 110 |
| 22    | Total         | detemir  | 217     | 1               | 1.0 | 1.0    | 3.581 | 4.00 | 51  |
| 23    | Total         | NPH      | 3314    | 1               | 1.0 | 1.0    | 3.610 | 4.00 | 486 |
| 24    | Total         | no DGN   | 817     | 1               | 1.0 | 1.0    | 4.632 | 5.00 | 176 |

Naive T2 cohort. Data 28th December 2011

Table F.63: Hospitalizations and secondary care visits due to severe hypoglycemic coma events stratified by time (Years) from year of diagnose (first reimbursement decision or purchase) at start of follow-up. The number of visits and the distribution of the length of the visits.

| S.No. | Variables | All (N)  | Days (%) |       |       |       |       | 7-    |
|-------|-----------|----------|----------|-------|-------|-------|-------|-------|
|       |           |          | N        | 0-1   | 2-3   | 4-5   | 6-7   |       |
| 1     | -1        | glargine | 254      | 70.87 | 12.60 | 4.72  | 3.15  | 8.66  |
| 2     | -1        | detemir  | 49       | 77.55 | 8.16  | 10.20 | 2.04  | 2.04  |
| 3     | -1        | NPH      | 1015     | 69.56 | 9.46  | 5.91  | 5.71  | 9.36  |
| 4     | -1        | no DGN   | 272      | 57.72 | 12.50 | 9.93  | 6.62  | 13.24 |
| 5     | 1-2       | glargine | 112      | 68.75 | 11.61 | 0.89  | 4.46  | 14.29 |
| 6     | 1-2       | detemir  | 17       | 64.71 | 11.76 | 5.88  | 5.88  | 11.76 |
| 7     | 1-2       | NPH      | 312      | 53.85 | 16.35 | 9.94  | 7.69  | 12.18 |
| 8     | 1-2       | no DGN   | 80       | 45.00 | 16.25 | 10.00 | 12.50 | 16.25 |
| 9     | 2-5       | glargine | 292      | 56.16 | 13.70 | 8.22  | 9.59  | 12.33 |
| 10    | 2-5       | detemir  | 60       | 43.33 | 18.33 | 18.33 | 6.67  | 13.33 |
| 11    | 2-5       | NPH      | 858      | 55.13 | 14.80 | 10.72 | 6.41  | 12.94 |
| 12    | 2-5       | no DGN   | 188      | 44.15 | 17.02 | 9.04  | 11.17 | 18.62 |
| 13    | 5-10      | glargine | 322      | 50.31 | 13.98 | 13.98 | 9.01  | 12.73 |
| 14    | 5-10      | detemir  | 60       | 63.33 | 11.67 | 6.67  | 5.00  | 13.33 |
| 15    | 5-10      | NPH      | 974      | 57.91 | 12.22 | 11.09 | 6.88  | 11.91 |
| 16    | 5-10      | no DGN   | 241      | 54.77 | 13.28 | 9.13  | 6.22  | 16.60 |
| 17    | 10-       | glargine | 149      | 75.17 | 10.74 | 4.70  | 3.36  | 6.04  |
| 18    | 10-       | detemir  | 31       | 22.58 | 32.26 | 25.81 | 9.68  | 9.68  |
| 19    | 10-       | NPH      | 155      | 70.97 | 9.03  | 3.87  | 5.16  | 10.97 |
| 20    | 10-       | no DGN   | 36       | 69.44 | 8.33  | 13.89 | 0.00  | 8.33  |
| 21    | Total     | glargine | 1129     | 61.56 | 12.93 | 7.88  | 6.64  | 10.98 |
| 22    | Total     | detemir  | 217      | 55.30 | 15.67 | 13.36 | 5.53  | 10.14 |
| 23    | Total     | NPH      | 3314     | 60.98 | 12.28 | 8.96  | 6.40  | 11.38 |
| 24    | Total     | no DGN   | 817      | 53.00 | 13.95 | 9.67  | 7.83  | 15.54 |

Naive T2 cohort. Data 28th December 2011

Table F.64: Hospitalizations and secondary care visits due to severe hypoglycemic coma events stratified by time (Years) from year of diagnose (first reimbursement decision or purchase) at start of follow-up. The number of visits and the distribution of visit length (Days) described by the minimum, the 25% quantile, the median, the mean, the 75% quantile and the maximum.

| S.No. | Variables | All (N)  | Duration (Days) |     |     |        |       |      |     |
|-------|-----------|----------|-----------------|-----|-----|--------|-------|------|-----|
|       |           |          | N               | Min | 25% | Median | Mean  | 75%  | Max |
| 1     | -1        | glargine | 254             | 1   | 1   | 1      | 2.980 | 2.00 | 56  |
| 2     | -1        | detemir  | 49              | 1   | 1   | 1      | 2.143 | 1.00 | 29  |
| 3     | -1        | NPH      | 1015            | 1   | 1   | 1      | 3.559 | 3.00 | 486 |
| 4     | -1        | no DGN   | 272             | 1   | 1   | 1      | 4.397 | 4.00 | 176 |
| 5     | 1-2       | glargine | 112             | 1   | 1   | 1      | 3.911 | 2.00 | 110 |
| 6     | 1-2       | detemir  | 17              | 1   | 1   | 1      | 5.882 | 2.00 | 38  |
| 7     | 1-2       | NPH      | 312             | 1   | 1   | 1      | 3.596 | 5.00 | 42  |
| 8     | 1-2       | no DGN   | 80              | 1   | 1   | 2      | 4.300 | 6.00 | 29  |
| 9     | 2-5       | glargine | 292             | 1   | 1   | 1      | 3.432 | 4.25 | 51  |
| 10    | 2-5       | detemir  | 60              | 1   | 1   | 2      | 4.267 | 5.00 | 51  |
| 11    | 2-5       | NPH      | 858             | 1   | 1   | 1      | 3.619 | 4.00 | 95  |
| 12    | 2-5       | no DGN   | 188             | 1   | 1   | 2      | 4.840 | 6.25 | 55  |
| 13    | 5-10      | glargine | 322             | 1   | 1   | 1      | 3.941 | 5.00 | 99  |
| 14    | 5-10      | detemir  | 60              | 1   | 1   | 1      | 3.267 | 3.25 | 31  |
| 15    | 5-10      | NPH      | 974             | 1   | 1   | 1      | 3.772 | 4.00 | 134 |
| 16    | 5-10      | no DGN   | 241             | 1   | 1   | 1      | 5.087 | 5.00 | 102 |
| 17    | 10-       | glargine | 149             | 1   | 1   | 1      | 2.718 | 1.00 | 79  |
| 18    | 10-       | detemir  | 31              | 1   | 2   | 2      | 3.871 | 5.00 | 16  |
| 19    | 10-       | NPH      | 155             | 1   | 1   | 1      | 2.910 | 2.00 | 21  |
| 20    | 10-       | no DGN   | 36              | 1   | 1   | 1      | 3.000 | 2.25 | 30  |
| 21    | Total     | glargine | 1129            | 1   | 1   | 1      | 3.429 | 4.00 | 110 |
| 22    | Total     | detemir  | 217             | 1   | 1   | 1      | 3.581 | 4.00 | 51  |
| 23    | Total     | NPH      | 3314            | 1   | 1   | 1      | 3.610 | 4.00 | 486 |
| 24    | Total     | no DGN   | 817             | 1   | 1   | 1      | 4.632 | 5.00 | 176 |

Naive T2 cohort. Data 28th December 2011

Table F.65: Hospitalizations and secondary care visits due to severe hypoglycemic coma events stratified by hospital district at start of follow-up and by insulin.

| S.No. | Variables         |          | All (N) | Days (%) |       |       |       |        |
|-------|-------------------|----------|---------|----------|-------|-------|-------|--------|
|       | Hosp. District    | Insulin  |         | 0-1      | 2-3   | 4-5   | 6-7   | 7-     |
| 1     | Unknown           | glargine | 152     | 59.21    | 13.16 | 9.21  | 5.26  | 13.16  |
| 2     | Unknown           | detemir  | 27      | 66.67    | 18.52 | 7.41  | 0.00  | 7.41   |
| 3     | Unknown           | NPH      | 1005    | 55.72    | 13.03 | 9.85  | 6.37  | 15.02  |
| 4     | Unknown           | no DGN   | 270     | 46.30    | 17.78 | 11.11 | 9.26  | 15.56  |
| 5     | HUS               | glargine | 358     | 65.64    | 12.29 | 6.42  | 5.59  | 10.06  |
| 6     | HUS               | detemir  | 54      | 51.85    | 18.52 | 12.96 | 9.26  | 7.41   |
| 7     | HUS               | NPH      | 601     | 62.56    | 10.32 | 8.15  | 7.15  | 11.81  |
| 8     | HUS               | no DGN   | 163     | 57.06    | 14.72 | 12.88 | 5.52  | 9.82   |
| 9     | Varsinais-Suomi   | glargine | 90      | 76.67    | 8.89  | 7.78  | 2.22  | 4.44   |
| 10    | Varsinais-Suomi   | detemir  | 21      | 80.95    | 9.52  | 4.76  | 4.76  | 0.00   |
| 11    | Varsinais-Suomi   | NPH      | 198     | 71.72    | 10.61 | 7.58  | 1.52  | 8.59   |
| 12    | Varsinais-Suomi   | no DGN   | 52      | 59.62    | 11.54 | 7.69  | 1.92  | 19.23  |
| 13    | Satakunta         | glargine | 18      | 66.67    | 22.22 | 0.00  | 0.00  | 11.11  |
| 14    | Satakunta         | detemir  | 15      | 73.33    | 13.33 | 6.67  | 6.67  | 0.00   |
| 15    | Satakunta         | NPH      | 98      | 61.22    | 16.33 | 9.18  | 9.18  | 4.08   |
| 16    | Satakunta         | no DGN   | 17      | 47.06    | 11.76 | 0.00  | 11.76 | 29.41  |
| 17    | Kantahame         | glargine | 50      | 60.00    | 6.00  | 6.00  | 18.00 | 10.00  |
| 18    | Kantahame         | detemir  | 3       | 66.67    | 0.00  | 0.00  | 0.00  | 33.33  |
| 19    | Kantahame         | NPH      | 141     | 75.89    | 6.38  | 5.67  | 5.67  | 6.38   |
| 20    | Kantahame         | no DGN   | 31      | 64.52    | 6.45  | 9.68  | 6.45  | 12.90  |
| 21    | Pirkanmaa         | glargine | 40      | 50.00    | 10.00 | 12.50 | 10.00 | 17.50  |
| 22    | Pirkanmaa         | detemir  | 7       | 85.71    | 0.00  | 0.00  | 14.29 | 0.00   |
| 23    | Pirkanmaa         | NPH      | 42      | 59.52    | 14.29 | 4.76  | 7.14  | 14.29  |
| 24    | Pirkanmaa         | no DGN   | 12      | 33.33    | 8.33  | 16.67 | 16.67 | 25.00  |
| 25    | Paijat-Hame       | glargine | 32      | 81.25    | 9.38  | 0.00  | 0.00  | 9.38   |
| 26    | Paijat-Hame       | detemir  | 7       | 42.86    | 0.00  | 28.57 | 14.29 | 14.29  |
| 27    | Paijat-Hame       | NPH      | 301     | 84.05    | 4.65  | 3.99  | 2.33  | 4.98   |
| 28    | Paijat-Hame       | no DGN   | 40      | 77.50    | 7.50  | 2.50  | 5.00  | 7.50   |
| 29    | Kymenlaakso       | glargine | 25      | 56.00    | 20.00 | 12.00 | 4.00  | 8.00   |
| 30    | Kymenlaakso       | detemir  | 4       | 50.00    | 0.00  | 0.00  | 0.00  | 50.00  |
| 31    | Kymenlaakso       | NPH      | 83      | 48.19    | 19.28 | 10.84 | 7.23  | 14.46  |
| 32    | Kymenlaakso       | no DGN   | 29      | 44.83    | 27.59 | 6.90  | 10.34 | 10.34  |
| 33    | Etela-Karjala     | glargine | 26      | 42.31    | 11.54 | 23.08 | 11.54 | 11.54  |
| 34    | Etela-Karjala     | detemir  | 5       | 40.00    | 0.00  | 20.00 | 0.00  | 40.00  |
| 35    | Etela-Karjala     | NPH      | 39      | 30.77    | 28.21 | 5.13  | 17.95 | 17.95  |
| 36    | Etela-Karjala     | no DGN   | 13      | 46.15    | 15.38 | 15.38 | 0.00  | 23.08  |
| 37    | Etela-Savo        | glargine | 7       | 42.86    | 28.57 | 14.29 | 0.00  | 14.29  |
| 38    | Etela-Savo        | detemir  | 2       | 50.00    | 50.00 | 0.00  | 0.00  | 0.00   |
| 39    | Etela-Savo        | NPH      | 41      | 34.15    | 31.71 | 21.95 | 4.88  | 7.32   |
| 40    | Etela-Savo        | no DGN   | 14      | 85.71    | 0.00  | 7.14  | 7.14  | 0.00   |
| 41    | Ita-Savo          | glargine | 11      | 72.73    | 9.09  | 9.09  | 0.00  | 9.09   |
| 42    | Ita-Savo          | detemir  | 0       | NaN      | NaN   | NaN   | NaN   | NaN    |
| 43    | Ita-Savo          | NPH      | 15      | 73.33    | 0.00  | 6.67  | 6.67  | 13.33  |
| 44    | Ita-Savo          | no DGN   | 10      | 60.00    | 0.00  | 20.00 | 0.00  | 20.00  |
| 45    | Pohjois-Karjala   | glargine | 7       | 100.00   | 0.00  | 0.00  | 0.00  | 0.00   |
| 46    | Pohjois-Karjala   | detemir  | 1       | 100.00   | 0.00  | 0.00  | 0.00  | 0.00   |
| 47    | Pohjois-Karjala   | NPH      | 34      | 97.06    | 0.00  | 0.00  | 0.00  | 2.94   |
| 48    | Pohjois-Karjala   | no DGN   | 0       | NaN      | NaN   | NaN   | NaN   | NaN    |
| 49    | Pohjois-Savo      | glargine | 58      | 58.62    | 8.62  | 5.17  | 12.07 | 15.52  |
| 50    | Pohjois-Savo      | detemir  | 11      | 36.36    | 18.18 | 36.36 | 9.09  | 0.00   |
| 51    | Pohjois-Savo      | NPH      | 83      | 62.65    | 10.84 | 6.02  | 12.05 | 8.43   |
| 52    | Pohjois-Savo      | no DGN   | 26      | 65.38    | 7.69  | 3.85  | 11.54 | 11.54  |
| 53    | Keski-Suomi       | glargine | 46      | 65.22    | 17.39 | 6.52  | 8.70  | 2.17   |
| 54    | Keski-Suomi       | detemir  | 14      | 85.71    | 7.14  | 7.14  | 0.00  | 0.00   |
| 55    | Keski-Suomi       | NPH      | 121     | 66.94    | 12.40 | 7.44  | 5.79  | 7.44   |
| 56    | Keski-Suomi       | no DGN   | 25      | 68.00    | 0.00  | 8.00  | 0.00  | 24.00  |
| 57    | Etela-Pohjanmaa   | glargine | 48      | 41.67    | 20.83 | 18.75 | 12.50 | 6.25   |
| 58    | Etela-Pohjanmaa   | detemir  | 14      | 7.14     | 35.71 | 28.57 | 7.14  | 21.43  |
| 59    | Etela-Pohjanmaa   | NPH      | 159     | 35.22    | 19.50 | 20.13 | 15.09 | 10.06  |
| 60    | Etela-Pohjanmaa   | no DGN   | 32      | 31.25    | 15.62 | 12.50 | 18.75 | 21.88  |
| 61    | Vaasa             | glargine | 28      | 82.14    | 10.71 | 0.00  | 3.57  | 3.57   |
| 62    | Vaasa             | detemir  | 6       | 33.33    | 16.67 | 16.67 | 0.00  | 33.33  |
| 63    | Vaasa             | NPH      | 51      | 74.51    | 13.73 | 1.96  | 0.00  | 9.80   |
| 64    | Vaasa             | no DGN   | 17      | 52.94    | 17.65 | 0.00  | 5.88  | 23.53  |
| 65    | Keski-Pohjanmaa   | glargine | 7       | 71.43    | 14.29 | 0.00  | 0.00  | 14.29  |
| 66    | Keski-Pohjanmaa   | detemir  | 3       | 66.67    | 33.33 | 0.00  | 0.00  | 0.00   |
| 67    | Keski-Pohjanmaa   | NPH      | 6       | 50.00    | 0.00  | 0.00  | 0.00  | 50.00  |
| 68    | Keski-Pohjanmaa   | no DGN   | 1       | 100.00   | 0.00  | 0.00  | 0.00  | 0.00   |
| 69    | Pohjois-Pohjanmaa | glargine | 61      | 52.46    | 13.11 | 6.56  | 8.20  | 19.67  |
| 70    | Pohjois-Pohjanmaa | detemir  | 12      | 41.67    | 25.00 | 16.67 | 0.00  | 16.67  |
| 71    | Pohjois-Pohjanmaa | NPH      | 154     | 69.48    | 14.94 | 5.84  | 3.25  | 6.49   |
| 72    | Pohjois-Pohjanmaa | no DGN   | 29      | 65.52    | 6.90  | 6.90  | 3.45  | 17.24  |
| 73    | Kainuu            | glargine | 14      | 57.14    | 21.43 | 14.29 | 0.00  | 7.14   |
| 74    | Kainuu            | detemir  | 0       | NaN      | NaN   | NaN   | NaN   | NaN    |
| 75    | Kainuu            | NPH      | 24      | 50.00    | 8.33  | 16.67 | 8.33  | 16.67  |
| 76    | Kainuu            | no DGN   | 4       | 25.00    | 50.00 | 0.00  | 0.00  | 25.00  |
| 77    | Lansi-Pohja       | glargine | 36      | 38.89    | 25.00 | 8.33  | 8.33  | 19.44  |
| 78    | Lansi-Pohja       | detemir  | 6       | 33.33    | 16.67 | 16.67 | 16.67 | 16.67  |
| 79    | Lansi-Pohja       | NPH      | 76      | 34.21    | 13.16 | 18.42 | 10.53 | 23.68  |
| 80    | Lansi-Pohja       | no DGN   | 22      | 31.82    | 13.64 | 9.09  | 9.09  | 36.36  |
| 81    | Lappi             | glargine | 15      | 26.67    | 13.33 | 13.33 | 13.33 | 33.33  |
| 82    | Lappi             | detemir  | 5       | 20.00    | 0.00  | 40.00 | 0.00  | 40.00  |
| 83    | Lappi             | NPH      | 40      | 32.50    | 25.00 | 20.00 | 7.50  | 15.00  |
| 84    | Lappi             | no DGN   | 9       | 33.33    | 11.11 | 0.00  | 44.44 | 11.11  |
| 85    | Ahvenanmaa        | glargine | 0       | NaN      | NaN   | NaN   | NaN   | NaN    |
| 86    | Ahvenanmaa        | detemir  | 0       | NaN      | NaN   | NaN   | NaN   | NaN    |
| 87    | Ahvenanmaa        | NPH      | 2       | 0.00     | 50.00 | 0.00  | 0.00  | 50.00  |
| 88    | Ahvenanmaa        | no DGN   | 1       | 0.00     | 0.00  | 0.00  | 0.00  | 100.00 |
| 89    | Total             | glargine | 1129    | 61.56    | 12.93 | 7.88  | 6.64  | 10.98  |
| 90    | Total             | detemir  | 217     | 55.30    | 15.67 | 13.36 | 5.53  | 10.14  |
| 91    | Total             | NPH      | 3314    | 60.98    | 12.28 | 8.96  | 6.40  | 11.38  |
| 92    | Total             | no DGN   | 817     | 53.00    | 13.95 | 9.67  | 7.83  | 15.54  |

Naive T2 cohort. Data 28th December 2011

Table F.66: Hospitalizations and secondary care visits due to severe hypoglycemic coma events stratified by hospital district at start of follow-up and by insulin.

| S.No. | Variables         |          | All (N) | Duration (Days) |       |        |        |       |     |
|-------|-------------------|----------|---------|-----------------|-------|--------|--------|-------|-----|
|       | Hosp. District    | Insulin  |         | Min             | 25%   | Median | Mean   | 75%   | Max |
| 1     | Unknown           | glargine | 152     | 1               | 1.00  | 1.0    | 3.691  | 4.00  | 56  |
| 2     | Unknown           | detemir  | 27      | 1               | 1.00  | 1.0    | 4.333  | 2.00  | 51  |
| 3     | Unknown           | NPH      | 1005    | 1               | 1.00  | 1.0    | 4.543  | 5.00  | 486 |
| 4     | Unknown           | no DGN   | 270     | 1               | 1.00  | 2.0    | 5.581  | 5.00  | 176 |
| 5     | HUS               | glargine | 358     | 1               | 1.00  | 1.0    | 3.425  | 3.00  | 110 |
| 6     | HUS               | detemir  | 54      | 1               | 1.00  | 1.0    | 3.037  | 4.00  | 17  |
| 7     | HUS               | NPH      | 601     | 1               | 1.00  | 1.0    | 3.649  | 4.00  | 105 |
| 8     | HUS               | no DGN   | 163     | 1               | 1.00  | 1.0    | 3.049  | 4.00  | 29  |
| 9     | Varsinais-Suomi   | glargine | 90      | 1               | 1.00  | 1.0    | 2.056  | 1.00  | 17  |
| 10    | Varsinais-Suomi   | detemir  | 21      | 1               | 1.00  | 1.0    | 1.524  | 1.00  | 6   |
| 11    | Varsinais-Suomi   | NPH      | 198     | 1               | 1.00  | 1.0    | 2.611  | 2.00  | 27  |
| 12    | Varsinais-Suomi   | no DGN   | 52      | 1               | 1.00  | 1.0    | 4.058  | 4.25  | 29  |
| 13    | Satakunta         | glargine | 18      | 1               | 1.00  | 1.0    | 4.611  | 2.75  | 52  |
| 14    | Satakunta         | detemir  | 15      | 1               | 1.00  | 1.0    | 1.867  | 1.50  | 7   |
| 15    | Satakunta         | NPH      | 98      | 1               | 1.00  | 1.0    | 2.429  | 3.00  | 11  |
| 16    | Satakunta         | no DGN   | 17      | 1               | 1.00  | 2.0    | 4.941  | 8.00  | 18  |
| 17    | Kantahame         | glargine | 50      | 1               | 1.00  | 1.0    | 3.580  | 6.00  | 24  |
| 18    | Kantahame         | detemir  | 3       | 1               | 1.00  | 1.0    | 4.667  | 6.50  | 12  |
| 19    | Kantahame         | NPH      | 141     | 1               | 1.00  | 1.0    | 2.695  | 1.00  | 34  |
| 20    | Kantahame         | no DGN   | 31      | 1               | 1.00  | 1.0    | 3.323  | 4.00  | 21  |
| 21    | Pirkanmaa         | glargine | 40      | 1               | 1.00  | 1.5    | 4.475  | 6.00  | 27  |
| 22    | Pirkanmaa         | detemir  | 7       | 1               | 1.00  | 1.0    | 1.857  | 1.00  | 7   |
| 23    | Pirkanmaa         | NPH      | 42      | 1               | 1.00  | 1.0    | 4.071  | 3.75  | 26  |
| 24    | Pirkanmaa         | no DGN   | 12      | 1               | 1.00  | 4.0    | 7.833  | 7.75  | 40  |
| 25    | Paijat-Hame       | glargine | 32      | 1               | 1.00  | 1.0    | 1.969  | 1.00  | 13  |
| 26    | Paijat-Hame       | detemir  | 7       | 1               | 1.00  | 4.0    | 3.857  | 5.50  | 9   |
| 27    | Paijat-Hame       | NPH      | 301     | 1               | 1.00  | 1.0    | 1.887  | 1.00  | 34  |
| 28    | Paijat-Hame       | no DGN   | 40      | 1               | 1.00  | 1.0    | 2.175  | 1.00  | 12  |
| 29    | Kymenlaakso       | glargine | 25      | 1               | 1.00  | 1.0    | 2.520  | 3.00  | 9   |
| 30    | Kymenlaakso       | detemir  | 4       | 1               | 1.00  | 4.5    | 5.500  | 9.00  | 12  |
| 31    | Kymenlaakso       | NPH      | 83      | 1               | 1.00  | 2.0    | 4.169  | 4.00  | 56  |
| 32    | Kymenlaakso       | no DGN   | 29      | 1               | 1.00  | 2.0    | 3.552  | 4.00  | 16  |
| 33    | Etela-Karjala     | glargine | 26      | 1               | 1.00  | 3.0    | 3.769  | 5.00  | 13  |
| 34    | Etela-Karjala     | detemir  | 5       | 1               | 1.00  | 5.0    | 10.400 | 10.00 | 35  |
| 35    | Etela-Karjala     | NPH      | 39      | 1               | 1.00  | 2.0    | 6.410  | 7.00  | 95  |
| 36    | Etela-Karjala     | no DGN   | 13      | 1               | 1.00  | 2.0    | 3.769  | 5.00  | 11  |
| 37    | Etela-Savo        | glargine | 7       | 1               | 1.00  | 2.0    | 4.000  | 4.00  | 15  |
| 38    | Etela-Savo        | detemir  | 2       | 1               | 1.50  | 2.0    | 2.000  | 2.50  | 3   |
| 39    | Etela-Savo        | NPH      | 41      | 1               | 1.00  | 2.0    | 3.463  | 5.00  | 18  |
| 40    | Etela-Savo        | no DGN   | 14      | 1               | 1.00  | 1.0    | 1.571  | 1.00  | 6   |
| 41    | Ita-Savo          | glargine | 11      | 1               | 1.00  | 1.0    | 2.091  | 2.00  | 8   |
| 42    | Ita-Savo          | detemir  | 0       | NA              | NA    | NA     | NaN    | NA    | NA  |
| 43    | Ita-Savo          | NPH      | 15      | 1               | 1.00  | 1.0    | 4.267  | 2.50  | 35  |
| 44    | Ita-Savo          | no DGN   | 10      | 1               | 1.00  | 1.0    | 3.500  | 4.75  | 10  |
| 45    | Pohjois-Karjala   | glargine | 7       | 1               | 1.00  | 1.0    | 1.000  | 1.00  | 1   |
| 46    | Pohjois-Karjala   | detemir  | 1       | 1               | 1.00  | 1.0    | 1.000  | 1.00  | 1   |
| 47    | Pohjois-Karjala   | NPH      | 34      | 1               | 1.00  | 1.0    | 1.206  | 1.00  | 8   |
| 48    | Pohjois-Karjala   | no DGN   | 0       | NA              | NA    | NA     | NaN    | NA    | NA  |
| 49    | Pohjois-Savo      | glargine | 58      | 1               | 1.00  | 1.0    | 3.379  | 6.00  | 15  |
| 50    | Pohjois-Savo      | detemir  | 11      | 1               | 1.00  | 3.0    | 3.091  | 5.00  | 6   |
| 51    | Pohjois-Savo      | NPH      | 83      | 1               | 1.00  | 1.0    | 3.880  | 4.00  | 56  |
| 52    | Pohjois-Savo      | no DGN   | 26      | 1               | 1.00  | 1.0    | 3.654  | 3.75  | 21  |
| 53    | Keski-Suomi       | glargine | 46      | 1               | 1.00  | 1.0    | 2.152  | 2.00  | 10  |
| 54    | Keski-Suomi       | detemir  | 14      | 1               | 1.00  | 1.0    | 1.357  | 1.00  | 5   |
| 55    | Keski-Suomi       | NPH      | 121     | 1               | 1.00  | 1.0    | 2.504  | 3.00  | 22  |
| 56    | Keski-Suomi       | no DGN   | 25      | 1               | 1.00  | 1.0    | 10.840 | 4.00  | 102 |
| 57    | Etela-Pohjanmaa   | glargine | 48      | 1               | 1.00  | 3.0    | 3.542  | 5.00  | 23  |
| 58    | Etela-Pohjanmaa   | detemir  | 14      | 1               | 2.25  | 4.0    | 6.929  | 6.50  | 38  |
| 59    | Etela-Pohjanmaa   | NPH      | 159     | 1               | 1.00  | 3.0    | 4.031  | 5.50  | 25  |
| 60    | Etela-Pohjanmaa   | no DGN   | 32      | 1               | 1.00  | 4.0    | 5.312  | 7.00  | 22  |
| 61    | Vaasa             | glargine | 28      | 1               | 1.00  | 1.0    | 1.571  | 1.00  | 8   |
| 62    | Vaasa             | detemir  | 6       | 1               | 1.25  | 3.0    | 9.000  | 12.25 | 31  |
| 63    | Vaasa             | NPH      | 51      | 1               | 1.00  | 1.0    | 2.706  | 1.50  | 22  |
| 64    | Vaasa             | no DGN   | 17      | 1               | 1.00  | 1.0    | 4.176  | 7.00  | 14  |
| 65    | Keski-Pohjanmaa   | glargine | 7       | 1               | 1.00  | 1.0    | 2.286  | 2.00  | 8   |
| 66    | Keski-Pohjanmaa   | detemir  | 3       | 1               | 1.00  | 1.0    | 1.333  | 1.50  | 2   |
| 67    | Keski-Pohjanmaa   | NPH      | 6       | 1               | 1.00  | 5.5    | 6.333  | 10.00 | 15  |
| 68    | Keski-Pohjanmaa   | no DGN   | 1       | 1               | 1.00  | 1.0    | 1.000  | 1.00  | 1   |
| 69    | Pohjois-Pohjanmaa | glargine | 61      | 1               | 1.00  | 1.0    | 6.443  | 6.00  | 99  |
| 70    | Pohjois-Pohjanmaa | detemir  | 12      | 1               | 1.00  | 2.0    | 3.583  | 4.00  | 15  |
| 71    | Pohjois-Pohjanmaa | NPH      | 154     | 1               | 1.00  | 1.0    | 2.279  | 2.00  | 28  |
| 72    | Pohjois-Pohjanmaa | no DGN   | 29      | 1               | 1.00  | 1.0    | 5.034  | 4.00  | 53  |
| 73    | Kainuu            | glargine | 14      | 1               | 1.00  | 1.0    | 2.286  | 3.00  | 8   |
| 74    | Kainuu            | detemir  | 0       | NA              | NA    | NA     | NaN    | NA    | NA  |
| 75    | Kainuu            | NPH      | 24      | 1               | 1.00  | 1.5    | 3.542  | 5.25  | 13  |
| 76    | Kainuu            | no DGN   | 4       | 1               | 1.75  | 2.5    | 3.750  | 4.50  | 9   |
| 77    | Lansi-Pohja       | glargine | 36      | 1               | 1.00  | 2.5    | 3.833  | 6.25  | 14  |
| 78    | Lansi-Pohja       | detemir  | 6       | 1               | 1.25  | 3.0    | 4.000  | 5.50  | 10  |
| 79    | Lansi-Pohja       | NPH      | 76      | 1               | 1.00  | 4.0    | 5.447  | 7.00  | 25  |
| 80    | Lansi-Pohja       | no DGN   | 22      | 1               | 1.00  | 4.5    | 7.182  | 8.00  | 50  |
| 81    | Lappi             | glargine | 15      | 1               | 1.50  | 4.0    | 5.867  | 9.50  | 14  |
| 82    | Lappi             | detemir  | 5       | 1               | 4.00  | 5.0    | 5.600  | 9.00  | 9   |
| 83    | Lappi             | NPH      | 40      | 1               | 1.00  | 3.0    | 4.300  | 5.00  | 29  |
| 84    | Lappi             | no DGN   | 9       | 1               | 1.00  | 6.0    | 5.333  | 6.00  | 18  |
| 85    | Ahvenanmaa        | glargine | 0       | NA              | NA    | NA     | NaN    | NA    | NA  |
| 86    | Ahvenanmaa        | detemir  | 0       | NA              | NA    | NA     | NaN    | NA    | NA  |
| 87    | Ahvenanmaa        | NPH      | 2       | 3               | 7.50  | 12.0   | 12.000 | 16.50 | 21  |
| 88    | Ahvenanmaa        | no DGN   | 1       | 17              | 17.00 | 17.0   | 17.000 | 17.00 | 17  |
| 89    | Total             | glargine | 1129    | 1               | 1.00  | 1.0    | 3.429  | 4.00  | 110 |
| 90    | Total             | detemir  | 217     | 1               | 1.00  | 1.0    | 3.581  | 4.00  | 51  |
| 91    | Total             | NPH      | 3314    | 1               | 1.00  | 1.0    | 3.610  | 4.00  | 486 |
| 92    | Total             | no DGN   | 817     | 1               | 1.00  | 1.0    | 4.632  | 5.00  | 176 |

Naive T2 cohort. Data 28th December 2011

## G Appendix 7: All-cause mortality analysis

### G.1 Crude estimates for risk of all-cause mortality

Table G.67: The number/risk time/incidence rate (95% CI) for all-cause mortality for detemir insulin, glargine insulin, and NPH-insulin stratified by gender.

| S.No. | Gender | Insulin  | Npat  | Events | Years  | Rate   | lower limit | upper limit |
|-------|--------|----------|-------|--------|--------|--------|-------------|-------------|
| 1     | Male   | glargine | 11955 | 672    | 20943  | 32.09  | 29.75       | 34.61       |
| 2     | Male   | detemir  | 5504  | 137    | 6044   | 22.67  | 19.17       | 26.80       |
| 3     | Male   | NPH      | 17121 | 2206   | 56240  | 39.22  | 37.62       | 40.90       |
| 4     | Male   | no DGN   | 19413 | 1539   | 15189  | 101.32 | 96.38       | 106.51      |
| 5     | Female | glargine | 8687  | 419    | 15008  | 27.92  | 25.37       | 30.72       |
| 6     | Female | detemir  | 4126  | 90     | 4565   | 19.71  | 16.03       | 24.24       |
| 7     | Female | NPH      | 13601 | 1583   | 44556  | 35.53  | 33.82       | 37.32       |
| 8     | Female | no DGN   | 15142 | 1538   | 14096  | 109.11 | 103.79      | 114.70      |
| 9     | Total  | glargine | 20642 | 1091   | 35951  | 30.35  | 28.60       | 32.20       |
| 10    | Total  | detemir  | 9630  | 227    | 10609  | 21.40  | 18.79       | 24.37       |
| 11    | Total  | NPH      | 30722 | 3789   | 100796 | 37.59  | 36.41       | 38.81       |
| 12    | Total  | no DGN   | 34555 | 3077   | 29285  | 105.07 | 101.42      | 108.85      |

Naive T2 cohort. Data 28th December 2011

Table G.68: The number/risk time/incidence rate (95% CI) for all-cause mortality for detemir insulin, glargine insulin, and NPH-insulin stratified by age at start of follow up.

| S.No. | Age group | Insulin  | Npat  | Events | Years  | Rate   | lower limit | upper limit |
|-------|-----------|----------|-------|--------|--------|--------|-------------|-------------|
| 1     | 0-9       | glargine | 23    | 0      | 49     | NA     | NA          | NA          |
| 2     | 0-9       | detemir  | 28    | 0      | 47     | NA     | NA          | NA          |
| 3     | 0-9       | NPH      | 37    | 0      | 106    | NA     | NA          | NA          |
| 4     | 0-9       | no DGN   | 39    | 0      | 29     | NA     | NA          | NA          |
| 5     | 10-19     | glargine | 54    | 0      | 161    | NA     | NA          | NA          |
| 6     | 10-19     | detemir  | 37    | 0      | 56     | NA     | NA          | NA          |
| 7     | 10-19     | NPH      | 54    | 1      | 144    | 6.96   | 0.98        | 49.43       |
| 8     | 10-19     | no DGN   | 79    | 0      | 106    | NA     | NA          | NA          |
| 9     | 20-29     | glargine | 152   | 0      | 287    | NA     | NA          | NA          |
| 10    | 20-29     | detemir  | 90    | 0      | 124    | NA     | NA          | NA          |
| 11    | 20-29     | NPH      | 239   | 3      | 565    | 5.31   | 1.71        | 16.46       |
| 12    | 20-29     | no DGN   | 286   | 2      | 609    | 3.28   | 0.82        | 13.13       |
| 13    | 30-39     | glargine | 646   | 11     | 1242   | 8.86   | 4.90        | 15.99       |
| 14    | 30-39     | detemir  | 377   | 4      | 476    | 8.40   | 3.15        | 22.38       |
| 15    | 30-39     | NPH      | 1065  | 24     | 3130   | 7.67   | 5.14        | 11.44       |
| 16    | 30-39     | no DGN   | 1257  | 13     | 2197   | 5.92   | 3.44        | 10.19       |
| 17    | 40-49     | glargine | 2183  | 38     | 4180   | 9.09   | 6.61        | 12.49       |
| 18    | 40-49     | detemir  | 1226  | 12     | 1523   | 7.88   | 4.47        | 13.87       |
| 19    | 40-49     | NPH      | 2970  | 146    | 10200  | 14.31  | 12.17       | 16.83       |
| 20    | 40-49     | no DGN   | 3609  | 101    | 3465   | 29.14  | 23.98       | 35.42       |
| 21    | 50-59     | glargine | 5543  | 172    | 10634  | 16.17  | 13.93       | 18.78       |
| 22    | 50-59     | detemir  | 2820  | 45     | 3314   | 13.58  | 10.14       | 18.19       |
| 23    | 50-59     | NPH      | 7990  | 579    | 29455  | 19.66  | 18.12       | 21.33       |
| 24    | 50-59     | no DGN   | 9146  | 293    | 7405   | 39.57  | 35.29       | 44.37       |
| 25    | 60-69     | glargine | 5543  | 234    | 9668   | 24.20  | 21.29       | 27.51       |
| 26    | 60-69     | detemir  | 2710  | 53     | 2908   | 18.22  | 13.92       | 23.85       |
| 27    | 60-69     | NPH      | 8254  | 933    | 29120  | 32.04  | 30.05       | 34.16       |
| 28    | 60-69     | no DGN   | 9163  | 574    | 6700   | 85.67  | 78.94       | 92.97       |
| 29    | 70-79     | glargine | 4187  | 318    | 6703   | 47.44  | 42.50       | 52.95       |
| 30    | 70-79     | detemir  | 1636  | 63     | 1584   | 39.77  | 31.07       | 50.91       |
| 31    | 70-79     | NPH      | 6692  | 1223   | 20787  | 58.83  | 55.63       | 62.22       |
| 32    | 70-79     | no DGN   | 7215  | 1027   | 5898   | 174.13 | 163.80      | 185.12      |
| 33    | 80+       | glargine | 2311  | 318    | 3025   | 105.11 | 94.17       | 117.33      |
| 34    | 80+       | detemir  | 706   | 50     | 577    | 86.61  | 65.64       | 114.28      |
| 35    | 80+       | NPH      | 3421  | 880    | 7289   | 120.73 | 113.01      | 128.98      |
| 36    | 80+       | no DGN   | 3761  | 1067   | 2875   | 371.14 | 349.52      | 394.09      |
| 37    | Total     | glargine | 20642 | 1091   | 35951  | 30.35  | 28.60       | 32.20       |
| 38    | Total     | detemir  | 9630  | 227    | 10609  | 21.40  | 18.79       | 24.37       |
| 39    | Total     | NPH      | 30722 | 3789   | 100796 | 37.59  | 36.41       | 38.81       |
| 40    | Total     | no DGN   | 34555 | 3077   | 29285  | 105.07 | 101.42      | 108.85      |

Naive T2 cohort. Data 28th December 2011

Table G.69: The number/risk time/incidence rate (95% CI) for all-cause mortality for detemir insulin, glargine insulin, and NPH-insulin stratified by calendar year at start of follow-up.

| S.No. | Calender year | Insulin  | Npat  | Events | Years  | Rate   | lower limit | upper limit |
|-------|---------------|----------|-------|--------|--------|--------|-------------|-------------|
| 1     | 00-05         | glargine | 7756  | 529    | 19452  | 27.20  | 24.97       | 29.61       |
| 2     | 00-05         | detemir  | 3155  | 76     | 4143   | 18.35  | 14.65       | 22.97       |
| 3     | 00-05         | NPH      | 21752 | 3106   | 86259  | 36.01  | 34.76       | 37.30       |
| 4     | 00-05         | no DGN   | 21163 | 2385   | 24593  | 96.98  | 93.16       | 100.95      |
| 5     | 06            | glargine | 1441  | 99     | 2749   | 36.01  | 29.57       | 43.85       |
| 6     | 06            | detemir  | 699   | 25     | 914    | 27.34  | 18.48       | 40.47       |
| 7     | 06            | NPH      | 3796  | 346    | 8138   | 42.52  | 38.26       | 47.24       |
| 8     | 06            | no DGN   | 3438  | 246    | 2103   | 116.96 | 103.22      | 132.53      |
| 9     | 07            | glargine | 3319  | 228    | 6397   | 35.64  | 31.30       | 40.58       |
| 10    | 07            | detemir  | 1257  | 55     | 1997   | 27.55  | 21.15       | 35.88       |
| 11    | 07            | NPH      | 2670  | 202    | 4357   | 46.37  | 40.39       | 53.22       |
| 12    | 07            | no DGN   | 4310  | 227    | 1553   | 146.12 | 128.30      | 166.43      |
| 13    | 08            | glargine | 4158  | 166    | 5416   | 30.65  | 26.32       | 35.68       |
| 14    | 08            | detemir  | 2057  | 52     | 2489   | 20.89  | 15.92       | 27.41       |
| 15    | 08            | NPH      | 1525  | 96     | 1639   | 58.57  | 47.95       | 71.54       |
| 16    | 08            | no DGN   | 3813  | 158    | 799    | 197.67 | 169.13      | 231.02      |
| 17    | 09            | glargine | 3968  | 69     | 1937   | 35.62  | 28.14       | 45.11       |
| 18    | 09            | detemir  | 2462  | 19     | 1067   | 17.82  | 11.36       | 27.93       |
| 19    | 09            | NPH      | 979   | 39     | 403    | 96.81  | 70.73       | 132.50      |
| 20    | 09            | no DGN   | 1831  | 61     | 236    | 258.75 | 201.33      | 332.56      |
| 21    | Total         | glargine | 20642 | 1091   | 35951  | 30.35  | 28.60       | 32.20       |
| 22    | Total         | detemir  | 9630  | 227    | 10609  | 21.40  | 18.79       | 24.37       |
| 23    | Total         | NPH      | 30722 | 3789   | 100796 | 37.59  | 36.41       | 38.81       |
| 24    | Total         | no DGN   | 34555 | 3077   | 29285  | 105.07 | 101.42      | 108.85      |

Naive T2 cohort. Data 28th December 2011



Table G.70: The number/risk time/incidence rate (95% CI) for all-cause mortality for detemir insulin, glargine insulin, and NPH-insulin stratified by calendar time since diagnose (first reimbursement decision or purchase).

| S.No.                                    | Time since diag | Insulin  | Npat  | Events | Years  | Rate   | lower limit | upper limit |
|------------------------------------------|-----------------|----------|-------|--------|--------|--------|-------------|-------------|
| 1                                        | -1              | glargine | 4809  | 195    | 8004   | 24.36  | 21.17       | 28.03       |
| 2                                        | -1              | detemir  | 2439  | 47     | 2720   | 17.28  | 12.98       | 23.00       |
| 3                                        | -1              | NPH      | 8609  | 924    | 26475  | 34.90  | 32.72       | 37.23       |
| 4                                        | -1              | no DGN   | 9284  | 691    | 11822  | 58.45  | 54.25       | 62.97       |
| 5                                        | 1-2             | glargine | 1623  | 83     | 2981   | 27.84  | 22.45       | 34.52       |
| 6                                        | 1-2             | detemir  | 785   | 16     | 957    | 16.72  | 10.25       | 27.30       |
| 7                                        | 1-2             | NPH      | 2613  | 335    | 9168   | 36.54  | 32.83       | 40.67       |
| 8                                        | 1-2             | no DGN   | 2855  | 240    | 2426   | 98.92  | 87.17       | 112.26      |
| 9                                        | 2-5             | glargine | 5382  | 282    | 10256  | 27.50  | 24.47       | 30.90       |
| 10                                       | 2-5             | detemir  | 2564  | 57     | 2880   | 19.79  | 15.27       | 25.66       |
| 11                                       | 2-5             | NPH      | 8852  | 1155   | 32566  | 35.47  | 33.48       | 37.57       |
| 12                                       | 2-5             | no DGN   | 9819  | 882    | 7290   | 120.98 | 113.26      | 129.24      |
| 13                                       | 5-10            | glargine | 6827  | 401    | 12025  | 33.35  | 30.24       | 36.78       |
| 14                                       | 5-10            | detemir  | 3043  | 81     | 3288   | 24.64  | 19.81       | 30.63       |
| 15                                       | 5-10            | NPH      | 9209  | 1205   | 29759  | 40.49  | 38.27       | 42.84       |
| 16                                       | 5-10            | no DGN   | 10631 | 1065   | 6914   | 154.03 | 145.06      | 163.57      |
| 17                                       | 10-             | glargine | 2001  | 130    | 2685   | 48.41  | 40.76       | 57.49       |
| 18                                       | 10-             | detemir  | 799   | 26     | 764    | 34.01  | 23.16       | 49.95       |
| 19                                       | 10-             | NPH      | 1439  | 170    | 2828   | 60.11  | 51.72       | 69.86       |
| 20                                       | 10-             | no DGN   | 1966  | 199    | 832    | 239.15 | 208.13      | 274.79      |
| 21                                       | Total           | glargine | 20642 | 1091   | 35951  | 30.35  | 28.60       | 32.20       |
| 22                                       | Total           | detemir  | 9630  | 227    | 10609  | 21.40  | 18.79       | 24.37       |
| 23                                       | Total           | NPH      | 30722 | 3789   | 100796 | 37.59  | 36.41       | 38.81       |
| 24                                       | Total           | no DGN   | 34555 | 3077   | 29285  | 105.07 | 101.42      | 108.85      |
| Naive T2 cohort. Data 28th December 2011 |                 |          |       |        |        |        |             |             |

Table G.71: The number/risk time/incidence rate (95% CI) for all-cause mortality for detemir insulin, glargine insulin, and NPH-insulin stratified by history use of oral diabetes medication (A10BB) at start of follow-up.

| S.No. | A10BB hist | Insulin  | Npat  | Events | Years  | Rate   | lower limit | upper limit |
|-------|------------|----------|-------|--------|--------|--------|-------------|-------------|
| 1     | No         | glargine | 5514  | 208    | 8276   | 25.13  | 21.94       | 28.79       |
| 2     | No         | detemir  | 2989  | 52     | 3098   | 16.78  | 12.79       | 22.03       |
| 3     | No         | NPH      | 8435  | 802    | 24704  | 32.46  | 30.29       | 34.79       |
| 4     | No         | no DGN   | 9480  | 622    | 10936  | 56.88  | 52.58       | 61.53       |
| 5     | Yes        | glargine | 15128 | 883    | 27674  | 31.91  | 29.87       | 34.08       |
| 6     | Yes        | detemir  | 6641  | 175    | 7511   | 23.30  | 20.09       | 27.02       |
| 7     | Yes        | NPH      | 22287 | 2987   | 76091  | 39.26  | 37.87       | 40.69       |
| 8     | Yes        | no DGN   | 25075 | 2455   | 18349  | 133.80 | 128.61      | 139.19      |
| 9     | Total      | glargine | 20642 | 1091   | 35951  | 30.35  | 28.60       | 32.20       |
| 10    | Total      | detemir  | 9630  | 227    | 10609  | 21.40  | 18.79       | 24.37       |
| 11    | Total      | NPH      | 30722 | 3789   | 100796 | 37.59  | 36.41       | 38.81       |
| 12    | Total      | no DGN   | 34555 | 3077   | 29285  | 105.07 | 101.42      | 108.85      |

Naive T2 cohort. Data 28th December 2011

Table G.72: The number/risk time/incidence rate (95% CI) for all-cause mortality for detemir insulin, glargine insulin, and NPH-insulin stratified by history use of insulin medication (A10A) at start of follow-up.

| S.No. | A10A hist | Insulin  | Npat  | Events | Years  | Rate   | lower limit | upper limit |
|-------|-----------|----------|-------|--------|--------|--------|-------------|-------------|
| 1     | No        | glargine | 19616 | 1015   | 34132  | 29.74  | 27.96       | 31.62       |
| 2     | No        | detemir  | 9060  | 207    | 9919   | 20.87  | 18.21       | 23.92       |
| 3     | No        | NPH      | 29485 | 3604   | 97771  | 36.86  | 35.68       | 38.09       |
| 4     | No        | no DGN   | 33070 | 2886   | 27756  | 103.98 | 100.25      | 107.84      |
| 5     | Yes       | glargine | 1026  | 76     | 1819   | 41.78  | 33.37       | 52.31       |
| 6     | Yes       | detemir  | 570   | 20     | 691    | 28.96  | 18.68       | 44.89       |
| 7     | Yes       | NPH      | 1237  | 185    | 3025   | 61.16  | 52.95       | 70.64       |
| 8     | Yes       | no DGN   | 1485  | 191    | 1529   | 124.92 | 108.40      | 143.96      |
| 9     | Total     | glargine | 20642 | 1091   | 35951  | 30.35  | 28.60       | 32.20       |
| 10    | Total     | detemir  | 9630  | 227    | 10609  | 21.40  | 18.79       | 24.37       |
| 11    | Total     | NPH      | 30722 | 3789   | 100796 | 37.59  | 36.41       | 38.81       |
| 12    | Total     | no DGN   | 34555 | 3077   | 29285  | 105.07 | 101.42      | 108.85      |

Naive T2 cohort. Data 28th December 2011

Table G.73: The number/risk time/incidence rate (95% CI) for all-cause mortality for detemir insulin, glargine insulin, and NPH-insulin stratified by hospitalization history at start of follow-up.

| S.No. | Hosp hist | Insulin  | Npat  | Events | Years  | Rate   | lower limit | upper limit |
|-------|-----------|----------|-------|--------|--------|--------|-------------|-------------|
| 1     | No        | glargine | 19079 | 986    | 33335  | 29.58  | 27.79       | 31.48       |
| 2     | No        | detemir  | 9024  | 198    | 10028  | 19.74  | 17.18       | 22.69       |
| 3     | No        | NPH      | 28643 | 3447   | 95097  | 36.25  | 35.06       | 37.48       |
| 4     | No        | no DGN   | 32220 | 2821   | 27419  | 102.89 | 99.16       | 106.75      |
| 5     | Yes       | glargine | 1563  | 105    | 2616   | 40.14  | 33.15       | 48.60       |
| 6     | Yes       | detemir  | 606   | 29     | 581    | 49.90  | 34.68       | 71.81       |
| 7     | Yes       | NPH      | 2079  | 342    | 5699   | 60.01  | 53.98       | 66.72       |
| 8     | Yes       | no DGN   | 2335  | 256    | 1866   | 137.18 | 121.37      | 155.06      |
| 9     | Total     | glargine | 20642 | 1091   | 35951  | 30.35  | 28.60       | 32.20       |
| 10    | Total     | detemir  | 9630  | 227    | 10609  | 21.40  | 18.79       | 24.37       |
| 11    | Total     | NPH      | 30722 | 3789   | 100796 | 37.59  | 36.41       | 38.81       |
| 12    | Total     | no DGN   | 34555 | 3077   | 29285  | 105.07 | 101.42      | 108.85      |

Naive T2 cohort. Data 28th December 2011

Table G.74: The number/risk time/incidence rate (95% CI) for all-cause mortality for detemir insulin, glargine insulin, and NPH-insulin stratified by hospital district at start of follow-up.

| S.No. | Hosp. District    | Insulin  | Npat  | Events | Years  | Rate   | lower limit | upper limit |
|-------|-------------------|----------|-------|--------|--------|--------|-------------|-------------|
| 1     | Unknown           | glargine | 1743  | 86     | 4181   | 20.57  | 16.65       | 25.41       |
| 2     | Unknown           | detemir  | 796   | 17     | 1098   | 15.48  | 9.63        | 24.91       |
| 3     | Unknown           | NPH      | 6289  | 1143   | 31631  | 36.14  | 34.10       | 38.29       |
| 4     | Unknown           | no DGN   | 5896  | 921    | 9384   | 98.15  | 92.01       | 104.69      |
| 5     | HUS               | glargine | 4568  | 225    | 7947   | 28.31  | 24.85       | 32.27       |
| 6     | HUS               | detemir  | 1962  | 52     | 2213   | 23.50  | 17.91       | 30.84       |
| 7     | HUS               | NPH      | 5538  | 561    | 15344  | 36.56  | 33.66       | 39.72       |
| 8     | HUS               | no DGN   | 6811  | 447    | 4856   | 92.05  | 83.90       | 100.99      |
| 9     | Varsinais-Suomi   | glargine | 1626  | 90     | 2954   | 30.46  | 24.78       | 37.46       |
| 10    | Varsinais-Suomi   | detemir  | 619   | 11     | 679    | 16.19  | 8.97        | 29.24       |
| 11    | Varsinais-Suomi   | NPH      | 1499  | 156    | 4355   | 35.82  | 30.62       | 41.90       |
| 12    | Varsinais-Suomi   | no DGN   | 2003  | 145    | 1260   | 115.11 | 97.82       | 135.46      |
| 13    | Satakunta         | glargine | 675   | 25     | 1047   | 23.87  | 16.13       | 35.32       |
| 14    | Satakunta         | detemir  | 568   | 18     | 603    | 29.83  | 18.79       | 47.35       |
| 15    | Satakunta         | NPH      | 1170  | 126    | 2988   | 42.17  | 35.41       | 50.21       |
| 16    | Satakunta         | no DGN   | 1291  | 122    | 1019   | 119.68 | 100.22      | 142.92      |
| 17    | Kantahame         | glargine | 757   | 34     | 1351   | 25.17  | 17.98       | 35.23       |
| 18    | Kantahame         | detemir  | 219   | 7      | 223    | 31.35  | 14.95       | 65.76       |
| 19    | Kantahame         | NPH      | 832   | 108    | 2481   | 43.54  | 36.05       | 52.57       |
| 20    | Kantahame         | no DGN   | 1024  | 70     | 677    | 103.37 | 81.78       | 130.65      |
| 21    | Pirkanmaa         | glargine | 1790  | 71     | 2809   | 25.28  | 20.03       | 31.90       |
| 22    | Pirkanmaa         | detemir  | 736   | 14     | 825    | 16.98  | 10.06       | 28.67       |
| 23    | Pirkanmaa         | NPH      | 2329  | 218    | 6765   | 32.23  | 28.22       | 36.80       |
| 24    | Pirkanmaa         | no DGN   | 2659  | 200    | 1808   | 110.61 | 96.29       | 127.05      |
| 25    | Paijat-Hame       | glargine | 708   | 41     | 1201   | 34.13  | 25.13       | 46.35       |
| 26    | Paijat-Hame       | detemir  | 346   | 10     | 375    | 26.65  | 14.34       | 49.54       |
| 27    | Paijat-Hame       | NPH      | 1147  | 147    | 3391   | 43.36  | 36.88       | 50.96       |
| 28    | Paijat-Hame       | no DGN   | 1199  | 102    | 781    | 130.65 | 107.60      | 158.63      |
| 29    | Kymenlaakso       | glargine | 708   | 29     | 1147   | 25.27  | 17.56       | 36.37       |
| 30    | Kymenlaakso       | detemir  | 321   | 5      | 325    | 15.37  | 6.40        | 36.93       |
| 31    | Kymenlaakso       | NPH      | 1004  | 117    | 2998   | 39.03  | 32.56       | 46.78       |
| 32    | Kymenlaakso       | no DGN   | 1158  | 107    | 746    | 143.52 | 118.75      | 173.46      |
| 33    | Etela-Karjala     | glargine | 559   | 48     | 989    | 48.54  | 36.58       | 64.42       |
| 34    | Etela-Karjala     | detemir  | 197   | 5      | 213    | 23.43  | 9.75        | 56.27       |
| 35    | Etela-Karjala     | NPH      | 641   | 71     | 1843   | 38.52  | 30.53       | 48.61       |
| 36    | Etela-Karjala     | no DGN   | 747   | 53     | 513    | 103.28 | 78.90       | 135.19      |
| 37    | Etela-Savo        | glargine | 342   | 17     | 503    | 33.77  | 20.99       | 54.32       |
| 38    | Etela-Savo        | detemir  | 202   | 4      | 215    | 18.63  | 6.99        | 49.62       |
| 39    | Etela-Savo        | NPH      | 646   | 91     | 1829   | 49.76  | 40.52       | 61.11       |
| 40    | Etela-Savo        | no DGN   | 684   | 48     | 482    | 99.61  | 75.07       | 132.18      |
| 41    | Ita-Savo          | glargine | 292   | 14     | 430    | 32.54  | 19.27       | 54.95       |
| 42    | Ita-Savo          | detemir  | 120   | 2      | 98     | 20.45  | 5.11        | 81.74       |
| 43    | Ita-Savo          | NPH      | 440   | 67     | 1253   | 53.46  | 42.08       | 67.92       |
| 44    | Ita-Savo          | no DGN   | 476   | 39     | 393    | 99.33  | 72.57       | 135.95      |
| 45    | Pohjois-Karjala   | glargine | 617   | 35     | 911    | 38.42  | 27.59       | 53.52       |
| 46    | Pohjois-Karjala   | detemir  | 405   | 10     | 366    | 27.29  | 14.68       | 50.72       |
| 47    | Pohjois-Karjala   | NPH      | 1157  | 135    | 3470   | 38.90  | 32.86       | 46.05       |
| 48    | Pohjois-Karjala   | no DGN   | 1169  | 92     | 843    | 109.15 | 88.98       | 133.90      |
| 49    | Pohjois-Savo      | glargine | 1191  | 75     | 2160   | 34.72  | 27.69       | 43.54       |
| 50    | Pohjois-Savo      | detemir  | 438   | 8      | 494    | 16.19  | 8.10        | 32.37       |
| 51    | Pohjois-Savo      | NPH      | 1154  | 123    | 3093   | 39.76  | 33.32       | 47.45       |
| 52    | Pohjois-Savo      | no DGN   | 1531  | 115    | 1059   | 108.62 | 90.47       | 130.40      |
| 53    | Keski-Suomi       | glargine | 870   | 43     | 1485   | 28.96  | 21.48       | 39.05       |
| 54    | Keski-Suomi       | detemir  | 528   | 13     | 586    | 22.20  | 12.89       | 38.23       |
| 55    | Keski-Suomi       | NPH      | 1268  | 124    | 3465   | 35.78  | 30.01       | 42.67       |
| 56    | Keski-Suomi       | no DGN   | 1450  | 111    | 1026   | 108.19 | 89.83       | 130.32      |
| 57    | Etela-Pohjanmaa   | glargine | 984   | 64     | 1539   | 41.58  | 32.54       | 53.12       |
| 58    | Etela-Pohjanmaa   | detemir  | 739   | 17     | 736    | 23.09  | 14.35       | 37.14       |
| 59    | Etela-Pohjanmaa   | NPH      | 1266  | 134    | 3604   | 37.18  | 31.39       | 44.04       |
| 60    | Etela-Pohjanmaa   | no DGN   | 1535  | 129    | 1064   | 121.23 | 102.02      | 144.07      |
| 61    | Vaasa             | glargine | 254   | 8      | 401    | 19.94  | 9.97        | 39.87       |
| 62    | Vaasa             | detemir  | 293   | 3      | 284    | 10.57  | 3.41        | 32.77       |
| 63    | Vaasa             | NPH      | 498   | 41     | 1477   | 27.77  | 20.45       | 37.71       |
| 64    | Vaasa             | no DGN   | 574   | 49     | 456    | 107.52 | 81.26       | 142.26      |
| 65    | Keski-Pohjanmaa   | glargine | 237   | 14     | 303    | 46.28  | 27.41       | 78.14       |
| 66    | Keski-Pohjanmaa   | detemir  | 200   | 5      | 195    | 25.64  | 10.67       | 61.59       |
| 67    | Keski-Pohjanmaa   | NPH      | 441   | 40     | 1414   | 28.28  | 20.74       | 38.55       |
| 68    | Keski-Pohjanmaa   | no DGN   | 472   | 32     | 325    | 98.54  | 69.69       | 139.34      |
| 69    | Pohjois-Pohjanmaa | glargine | 1506  | 92     | 2633   | 34.95  | 28.49       | 42.87       |
| 70    | Pohjois-Pohjanmaa | detemir  | 502   | 11     | 585    | 18.81  | 10.42       | 33.96       |
| 71    | Pohjois-Pohjanmaa | NPH      | 1593  | 173    | 4329   | 39.97  | 34.43       | 46.39       |
| 72    | Pohjois-Pohjanmaa | no DGN   | 1968  | 159    | 1346   | 118.15 | 101.14      | 138.02      |
| 73    | Kainuu            | glargine | 399   | 23     | 660    | 34.85  | 23.16       | 52.45       |
| 74    | Kainuu            | detemir  | 183   | 9      | 208    | 43.24  | 22.50       | 83.11       |
| 75    | Kainuu            | NPH      | 623   | 85     | 1722   | 49.35  | 39.90       | 61.04       |
| 76    | Kainuu            | no DGN   | 647   | 46     | 367    | 125.23 | 93.80       | 167.19      |
| 77    | Lansi-Pohja       | glargine | 374   | 19     | 575    | 33.06  | 21.08       | 51.82       |
| 78    | Lansi-Pohja       | detemir  | 96    | 2      | 98     | 20.32  | 5.08        | 81.26       |
| 79    | Lansi-Pohja       | NPH      | 421   | 46     | 1140   | 40.37  | 30.24       | 53.89       |
| 80    | Lansi-Pohja       | no DGN   | 482   | 43     | 370    | 116.22 | 86.20       | 156.71      |
| 81    | Lappi             | glargine | 427   | 37     | 704    | 52.54  | 38.07       | 72.52       |
| 82    | Lappi             | detemir  | 154   | 4      | 180    | 22.23  | 8.34        | 59.22       |
| 83    | Lappi             | NPH      | 689   | 77     | 2012   | 38.28  | 30.62       | 47.86       |
| 84    | Lappi             | no DGN   | 712   | 43     | 465    | 92.57  | 68.65       | 124.81      |
| 85    | Ahvenanmaa        | glargine | 15    | 1      | 20     | 48.98  | 6.90        | 347.73      |
| 86    | Ahvenanmaa        | detemir  | 6     | 0      | 8      | NA     | NA          | NA          |
| 87    | Ahvenanmaa        | NPH      | 77    | 6      | 193    | 31.13  | 13.99       | 69.30       |
| 88    | Ahvenanmaa        | no DGN   | 67    | 4      | 47     | 85.79  | 32.20       | 228.60      |
| 89    | Total             | glargine | 20642 | 1091   | 35951  | 30.35  | 28.60       | 32.20       |
| 90    | Total             | detemir  | 9630  | 227    | 10609  | 21.40  | 18.79       | 24.37       |
| 91    | Total             | NPH      | 30722 | 3789   | 100796 | 37.59  | 36.41       | 38.81       |
| 92    | Total             | no DGN   | 34555 | 3077   | 29285  | 105.07 | 101.42      | 108.85      |

Naive T2 cohort. Data 28th December 2011

## G.2 Cox's proportional hazards model for risk of all-cause mortality analysis

Table G.75: The risk for all-cause mortality estimated by the Cox's proportional hazards model. Hospital district as strata. Glargine insulin as reference

| S.No. | Variables       | parameter est | std   | Hazard ratio | lower | upper  | P-value |
|-------|-----------------|---------------|-------|--------------|-------|--------|---------|
| 1     | insulin detemir | -0.241        | 0.074 | 0.786        | 0.68  | 0.908  | 0.001   |
| 2     | insulin NPH     | 0.447         | 0.042 | 1.564        | 1.44  | 1.699  | <0.001  |
| 3     | insulin no DGN  | 1.44          | 0.042 | 4.22         | 3.888 | 4.579  | <0.001  |
| 4     | gender Female   | -0.4          | 0.023 | 0.67         | 0.64  | 0.701  | <0.001  |
| 5     | agegroupD 40-49 | 0.99          | 0.144 | 2.691        | 2.029 | 3.569  | <0.001  |
| 6     | agegroupD 50-59 | 1.391         | 0.136 | 4.02         | 3.082 | 5.245  | <0.001  |
| 7     | agegroupD 60-69 | 1.968         | 0.135 | 7.159        | 5.499 | 9.319  | <0.001  |
| 8     | agegroupD 70-79 | 2.681         | 0.134 | 14.605       | 11.23 | 18.994 | <0.001  |
| 9     | agegroupD 80+   | 3.48          | 0.135 | 32.452       | 24.93 | 42.243 | <0.001  |
| 10    | BB.stfup Yes    | 0.243         | 0.04  | 1.275        | 1.18  | 1.378  | <0.001  |
| 11    | useBB Yes       | -0.481        | 0.027 | 0.618        | 0.587 | 0.652  | <0.001  |
| 12    | A10A.stfup Yes  | 0.43          | 0.049 | 1.537        | 1.397 | 1.692  | <0.001  |
| 13    | useA10A Yes     | -0.343        | 0.03  | 0.71         | 0.668 | 0.753  | <0.001  |
| 14    | hosph.stfup Yes | -0.304        | 0.054 | 0.738        | 0.664 | 0.82   | <0.001  |
| 15    | nhosph2 1-2     | 0.668         | 0.041 | 1.95         | 1.798 | 2.115  | <0.001  |
| 16    | nhosph2 3+      | 1.071         | 0.079 | 2.918        | 2.5   | 3.405  | <0.001  |
| 17    | Switch YES      | 0.307         | 0.045 | 1.359        | 1.245 | 1.483  | <0.001  |
| 18    | time2diag 1-2   | 0.006         | 0.051 | 1.006        | 0.911 | 1.111  | 0.901   |
| 19    | time2diag 2-5   | -0.035        | 0.04  | 0.966        | 0.893 | 1.045  | 0.387   |
| 20    | time2diag 5-10  | -0.095        | 0.041 | 0.909        | 0.839 | 0.985  | 0.02    |
| 21    | time2diag 10-   | 0.012         | 0.06  | 1.012        | 0.901 | 1.138  | 0.839   |
| 22    | calyear2 06     | 0.004         | 0.043 | 1.004        | 0.923 | 1.092  | 0.927   |
| 23    | calyear2 07     | 0.149         | 0.046 | 1.161        | 1.061 | 1.27   | 0.001   |
| 24    | calyear2 08     | 0.09          | 0.057 | 1.094        | 0.979 | 1.224  | 0.114   |
| 25    | calyear2 09     | 0.183         | 0.084 | 1.201        | 1.018 | 1.417  | 0.03    |

Naive T2 cohort. Data 28th December 2011

Table G.76: The risk for all-cause mortality estimated by the Cox's proportional hazards model. Hospital district as strata. NPH insulin as reference

| S.No. | Variables           | parameter est | std   | Hazard ratio | lower | upper  | P-value |
|-------|---------------------|---------------|-------|--------------|-------|--------|---------|
| 1     | insulinNPH detemir  | -0.688        | 0.076 | 0.503        | 0.433 | 0.583  | <0.001  |
| 2     | insulinNPH glargine | -0.447        | 0.042 | 0.639        | 0.588 | 0.694  | <0.001  |
| 3     | insulinNPH no DGN   | 0.992         | 0.025 | 2.697        | 2.566 | 2.836  | <0.001  |
| 4     | gender Female       | -0.4          | 0.023 | 0.67         | 0.64  | 0.701  | <0.001  |
| 5     | agegroupD 40-49     | 0.99          | 0.144 | 2.691        | 2.029 | 3.569  | <0.001  |
| 6     | agegroupD 50-59     | 1.391         | 0.136 | 4.02         | 3.082 | 5.245  | <0.001  |
| 7     | agegroupD 60-69     | 1.968         | 0.135 | 7.159        | 5.499 | 9.319  | <0.001  |
| 8     | agegroupD 70-79     | 2.681         | 0.134 | 14.605       | 11.23 | 18.994 | <0.001  |
| 9     | agegroupD 80+       | 3.48          | 0.135 | 32.452       | 24.93 | 42.243 | <0.001  |
| 10    | BB.stfup Yes        | 0.243         | 0.04  | 1.275        | 1.18  | 1.378  | <0.001  |
| 11    | useBB Yes           | -0.481        | 0.027 | 0.618        | 0.587 | 0.652  | <0.001  |
| 12    | A10A.stfup Yes      | 0.43          | 0.049 | 1.537        | 1.397 | 1.692  | <0.001  |
| 13    | useA10A Yes         | -0.343        | 0.03  | 0.71         | 0.668 | 0.753  | <0.001  |
| 14    | hosph.stfup Yes     | -0.304        | 0.054 | 0.738        | 0.664 | 0.82   | <0.001  |
| 15    | nhosph2 1-2         | 0.668         | 0.041 | 1.95         | 1.798 | 2.115  | <0.001  |
| 16    | nhosph2 3+          | 1.071         | 0.079 | 2.918        | 2.5   | 3.405  | <0.001  |
| 17    | Switch YES          | 0.307         | 0.045 | 1.359        | 1.245 | 1.483  | <0.001  |
| 18    | time2diag 1-2       | 0.006         | 0.051 | 1.006        | 0.911 | 1.111  | 0.901   |
| 19    | time2diag 2-5       | -0.035        | 0.04  | 0.966        | 0.893 | 1.045  | 0.387   |
| 20    | time2diag 5-10      | -0.095        | 0.041 | 0.909        | 0.839 | 0.985  | 0.02    |
| 21    | time2diag 10-       | 0.012         | 0.06  | 1.012        | 0.901 | 1.138  | 0.839   |
| 22    | calyear2 06         | 0.004         | 0.043 | 1.004        | 0.923 | 1.092  | 0.927   |
| 23    | calyear2 07         | 0.149         | 0.046 | 1.161        | 1.061 | 1.27   | 0.001   |
| 24    | calyear2 08         | 0.09          | 0.057 | 1.094        | 0.979 | 1.224  | 0.114   |
| 25    | calyear2 09         | 0.183         | 0.084 | 1.201        | 1.018 | 1.417  | 0.03    |

Naive T2 cohort. Data 28th December 2011

Table G.77: Sensitivity analysis for all-cause mortality estimated by the Cox's proportional hazards model. Hospital district as strata. NPH insulin as reference. I) Original estimates, II-IV) Inverse propensity score weighting (IPW). Individuals weighted by the inverse of the probability to start on their insulin conditional on covariates (gender, typedm, agegroup2, calyear2, BB.stfup, A10A.stfup, hosph.stfup, time2diag), truncation points given in paranthesis, III) IPW-weights with no truncation.

| S.No. | Variables           | I      |       | II [0.1/0.9] |        | III [0.01/0.99] |        | IV [0.001/0.999] |        | V [0/1] |        |        |        |        |        |
|-------|---------------------|--------|-------|--------------|--------|-----------------|--------|------------------|--------|---------|--------|--------|--------|--------|--------|
|       |                     | HR     | lower | upper        | HR     | lower           | upper  | HR               | lower  | upper   | HR     | lower  | upper  |        |        |
| 1     | insulinNPH detemir  | 0.503  | 0.433 | 0.583        | 0.489  | 0.576           | 0.581  | 0.478            | 0.705  | 0.596   | 0.491  | 0.723  | 0.412  | 0.339  | 0.5    |
| 2     | insulinNPH glargine | 0.639  | 0.588 | 0.694        | 0.677  | 0.74            | 0.734  | 0.66             | 0.816  | 0.736   | 0.663  | 0.819  | 0.735  | 0.661  | 0.817  |
| 3     | insulinNPH no DGN   | 2.697  | 2.566 | 2.836        | 2.758  | 2.919           | 2.684  | 2.483            | 2.901  | 2.676   | 2.475  | 2.892  | 2.69   | 2.488  | 2.908  |
| 4     | gender Female       | 0.67   | 0.64  | 0.701        | 0.675  | 0.641           | 0.711  | 0.684            | 0.738  | 0.687   | 0.636  | 0.742  | 0.691  | 0.64   | 0.746  |
| 5     | agegroupD 40-49     | 2.691  | 2.029 | 3.569        | 2.757  | 2.019           | 3.098  | 1.947            | 4.929  | 3.258   | 2.048  | 5.183  | 4.945  | 3.108  | 7.867  |
| 6     | agegroupD 50-59     | 4.02   | 3.082 | 5.245        | 4.08   | 3.045           | 4.65   | 3.009            | 7.186  | 4.699   | 3.04   | 7.262  | 8.289  | 5.344  | 12.764 |
| 7     | agegroupD 60-69     | 7.159  | 5.499 | 9.319        | 7.336  | 5.488           | 9.807  | 5.499            | 13.016 | 8.397   | 5.458  | 12.919 | 12.673 | 8.237  | 19.498 |
| 8     | agegroupD 70-79     | 14.605 | 11.23 | 18.994       | 14.769 | 11.06           | 19.721 | 16.824           | 25.86  | 17.246  | 11.22  | 26.508 | 28.634 | 18.629 | 44.013 |
| 9     | agegroupD 80+       | 32.452 | 24.93 | 42.243       | 32.026 | 23.964          | 42.799 | 35.477           | 54.592 | 36.205  | 23.528 | 55.713 | 59.236 | 38.495 | 91.154 |
| 10    | BB.stfup Yes        | 1.275  | 1.18  | 1.378        | 1.29   | 1.177           | 1.413  | 1.309            | 1.507  | 1.331   | 1.156  | 1.533  | 1.329  | 1.154  | 1.531  |
| 11    | useBB Yes           | 0.618  | 0.587 | 0.652        | 0.612  | 0.577           | 0.65   | 0.583            | 0.638  | 0.58    | 0.529  | 0.635  | 0.6    | 0.548  | 0.657  |
| 12    | A10A.stfup Yes      | 1.537  | 1.397 | 1.692        | 1.57   | 1.4             | 1.76   | 1.669            | 1.429  | 1.739   | 1.488  | 2.031  | 1.738  | 1.487  | 2.03   |
| 13    | useA10A Yes         | 0.71   | 0.668 | 0.753        | 0.711  | 0.662           | 0.764  | 0.671            | 0.603  | 0.747   | 0.651  | 0.585  | 0.725  | 0.61   | 0.548  |
| 14    | hosph.stfup Yes     | 0.738  | 0.664 | 0.82         | 0.724  | 0.637           | 0.823  | 0.708            | 0.579  | 0.867   | 0.691  | 0.564  | 0.845  | 0.728  | 0.595  |
| 15    | hosph2 1-2          | 1.95   | 1.798 | 2.115        | 1.977  | 1.789           | 2.186  | 1.977            | 1.685  | 2.319   | 1.984  | 2.327  | 1.937  | 1.651  | 2.272  |
| 16    | hosph2 3+           | 2.918  | 2.5   | 3.405        | 3.085  | 2.538           | 3.749  | 3.307            | 2.432  | 4.515   | 3.205  | 2.347  | 4.375  | 3.177  | 4.338  |
| 17    | Switch YES          | 1.359  | 1.245 | 1.483        | 1.317  | 1.191           | 1.457  | 1.141            | 0.992  | 1.124   | 0.977  | 1.294  | 1.043  | 0.906  | 1.2    |
| 18    | time2diag 1-2       | 1.006  | 0.911 | 1.111        | 1.014  | 0.903           | 1.138  | 1.033            | 0.858  | 1.244   | 1.012  | 0.841  | 1.218  | 0.911  | 1.097  |
| 19    | time2diag 2-5       | 0.966  | 0.893 | 1.045        | 0.987  | 0.901           | 1.082  | 1.009            | 0.872  | 1.168   | 1.001  | 0.865  | 1.158  | 0.875  | 1.013  |
| 20    | time2diag 5-10      | 0.909  | 0.839 | 0.985        | 0.917  | 0.835           | 1.006  | 0.926            | 0.8    | 1.071   | 0.9    | 0.777  | 1.041  | 0.803  | 0.694  |
| 21    | time2diag 10+       | 1.012  | 0.901 | 1.138        | 1.012  | 0.886           | 1.156  | 1.008            | 0.831  | 1.223   | 1.013  | 0.835  | 1.228  | 0.94   | 0.775  |
| 22    | calyear2 06         | 1.004  | 0.923 | 1.092        | 1.042  | 0.947           | 1.146  | 1.084            | 0.938  | 1.253   | 1.076  | 0.931  | 1.243  | 1.238  | 1.071  |
| 23    | calyear2 07         | 1.161  | 1.061 | 1.27         | 1.156  | 1.051           | 1.271  | 1.153            | 1.019  | 1.304   | 1.158  | 1.023  | 1.31   | 1.387  | 1.226  |
| 24    | calyear2 08         | 1.094  | 0.979 | 1.224        | 1.1    | 0.974           | 1.242  | 1.119            | 0.966  | 1.295   | 1.133  | 0.978  | 1.311  | 1.389  | 1.2    |
| 25    | calyear2 09         | 1.201  | 1.018 | 1.417        | 1.244  | 1.041           | 1.488  | 1.432            | 1.148  | 1.788   | 1.449  | 1.161  | 1.808  | 1.785  | 2.228  |

Naive T2 cohort. Data 28th December 2011
